# Supplementary material
Source: PubMed Central journal article supplement (PMC10543610)

Full unedited gel blots

The Protein ladder used for the manuscript was: Bio Rad **Precision Plus Protein Dual Color Standards, #1610374**

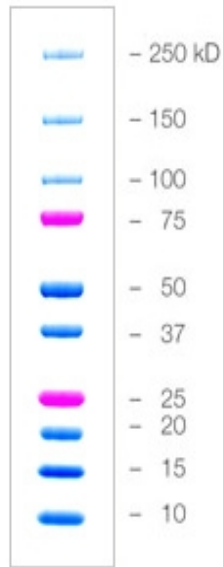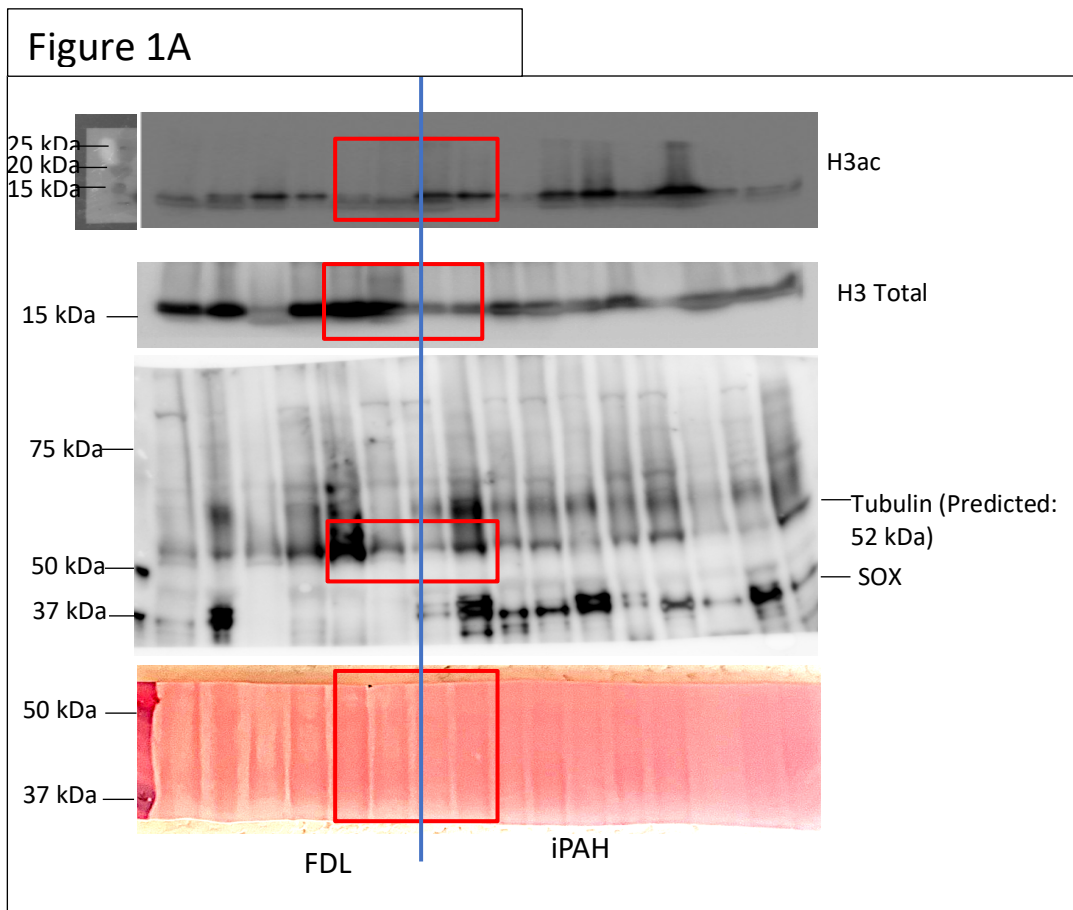

Figure 1E

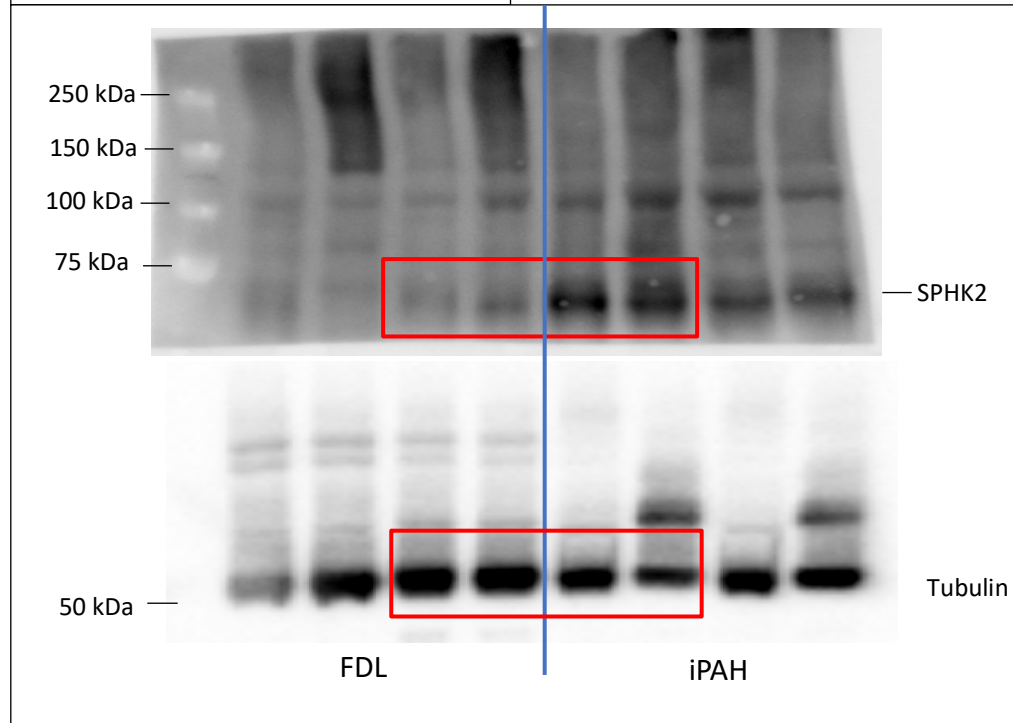

Figure 2E

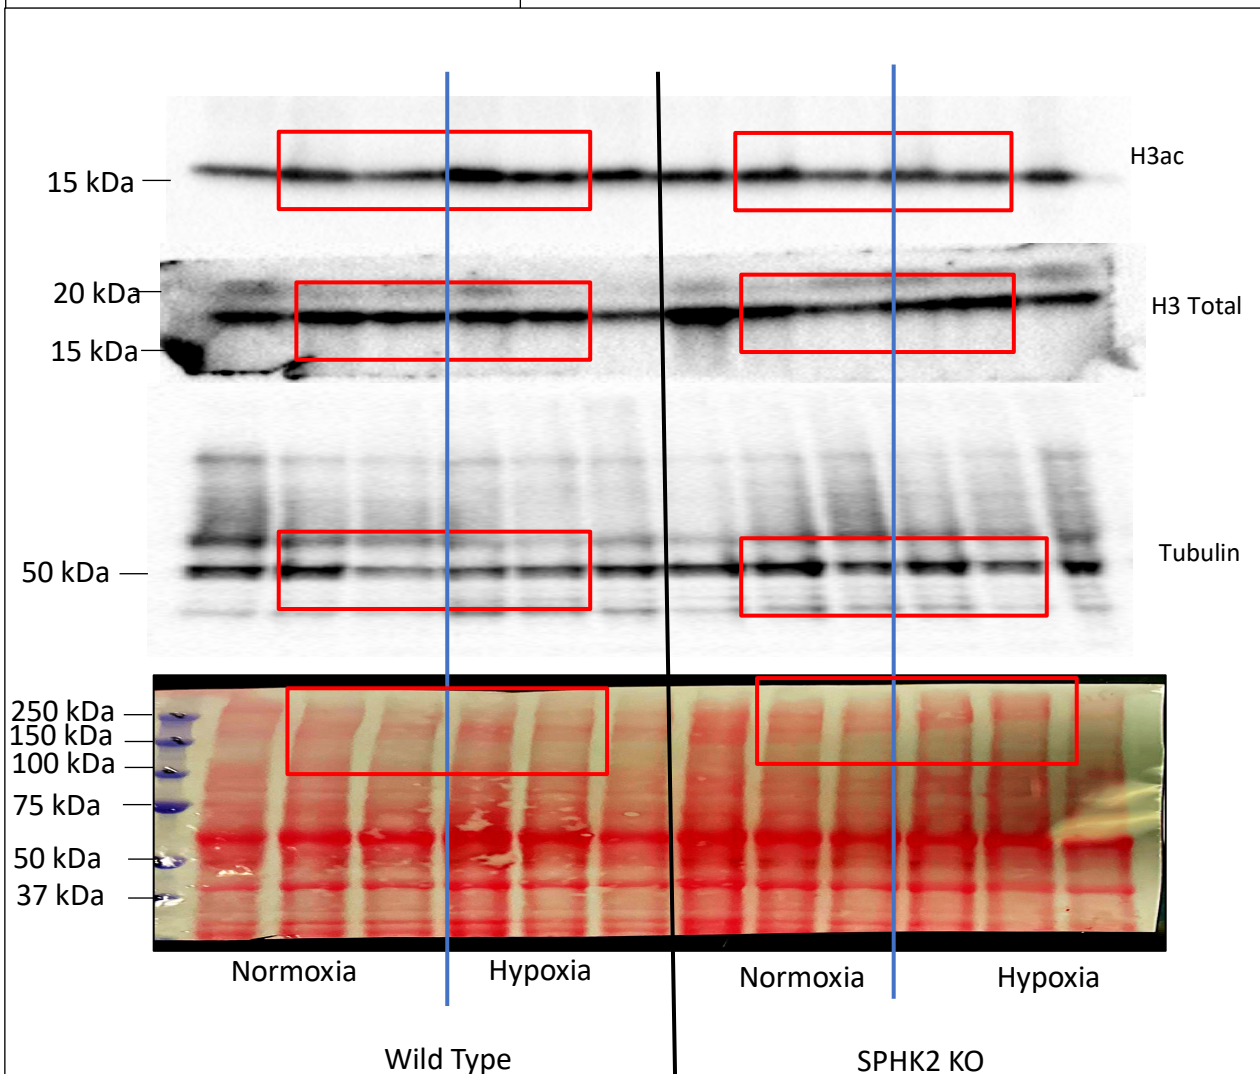

Figure 3A

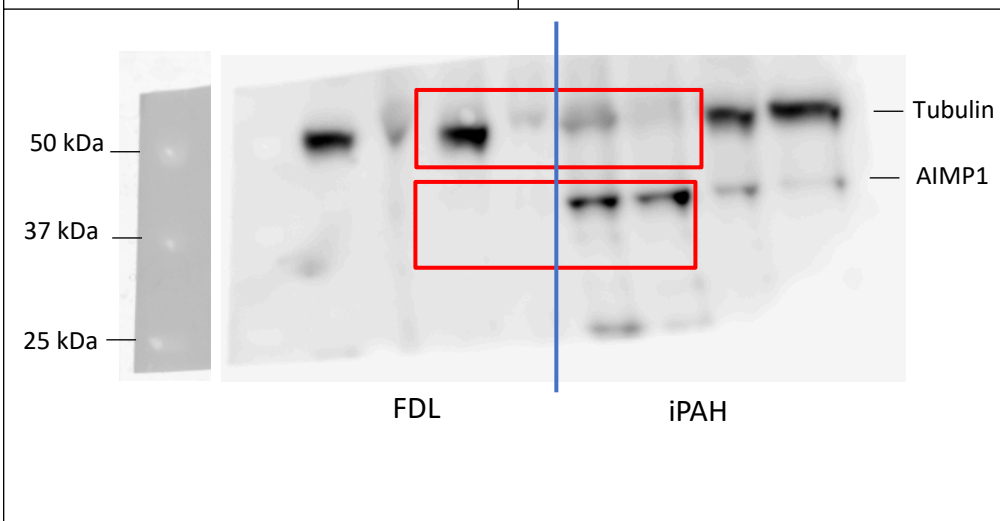

Figure 3C

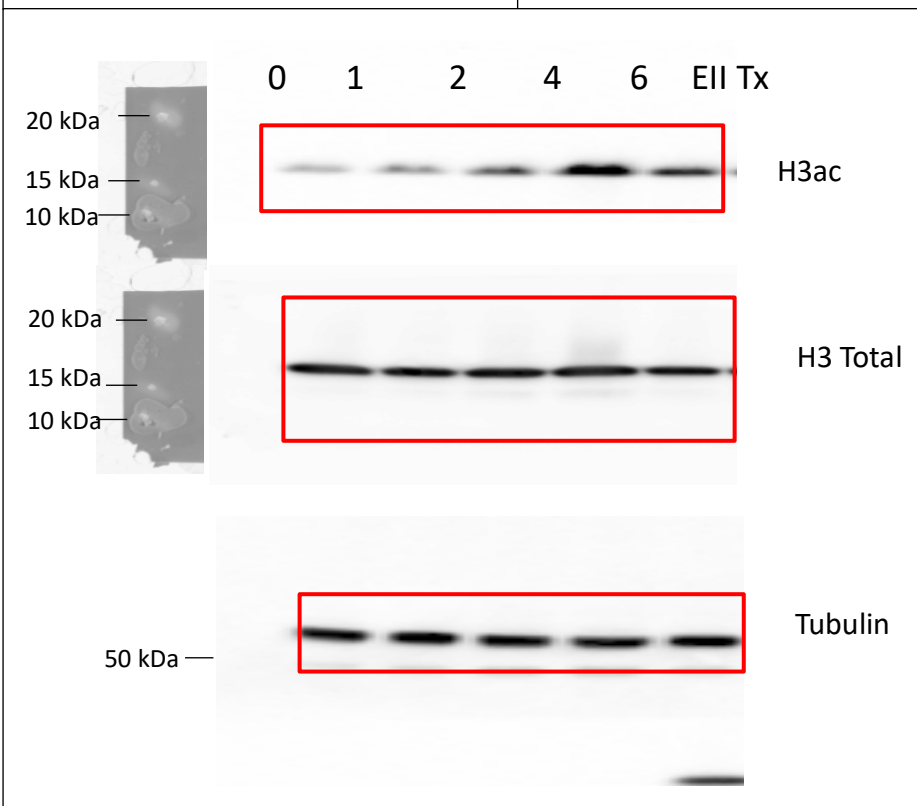

Figure 3E

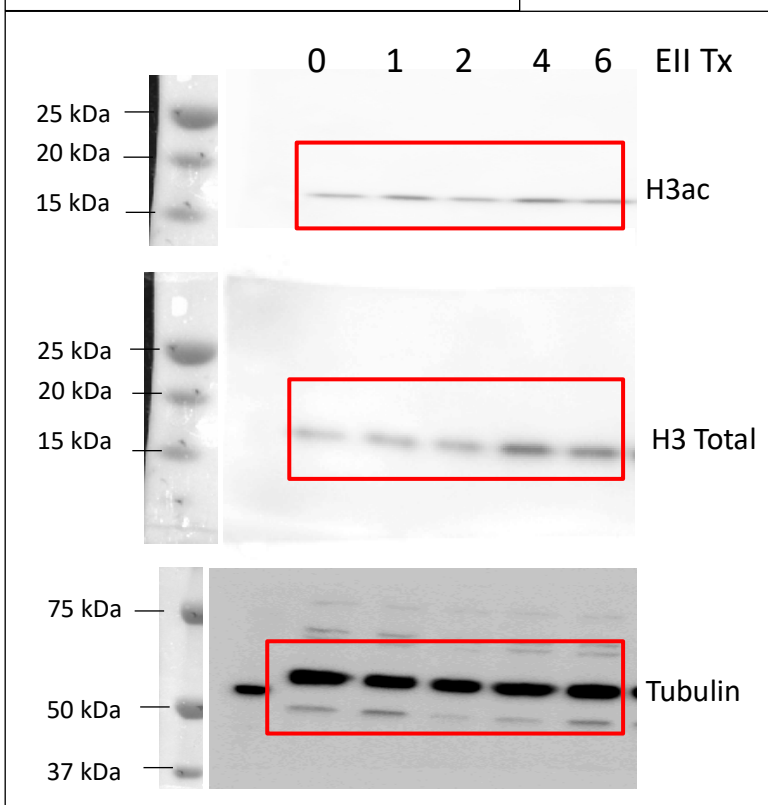

Figure 4B

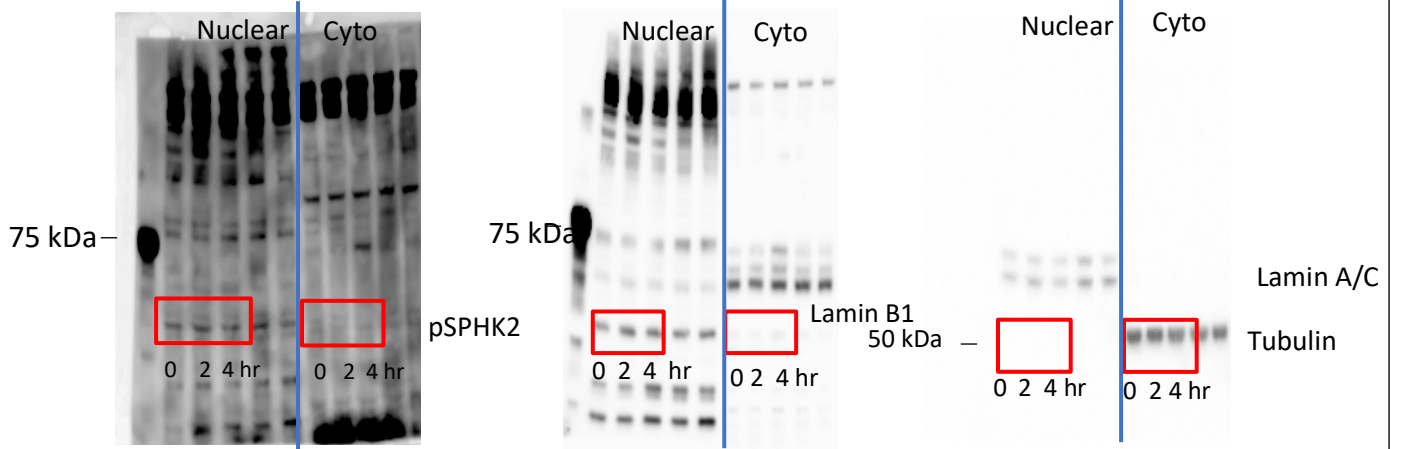

Figure 4C

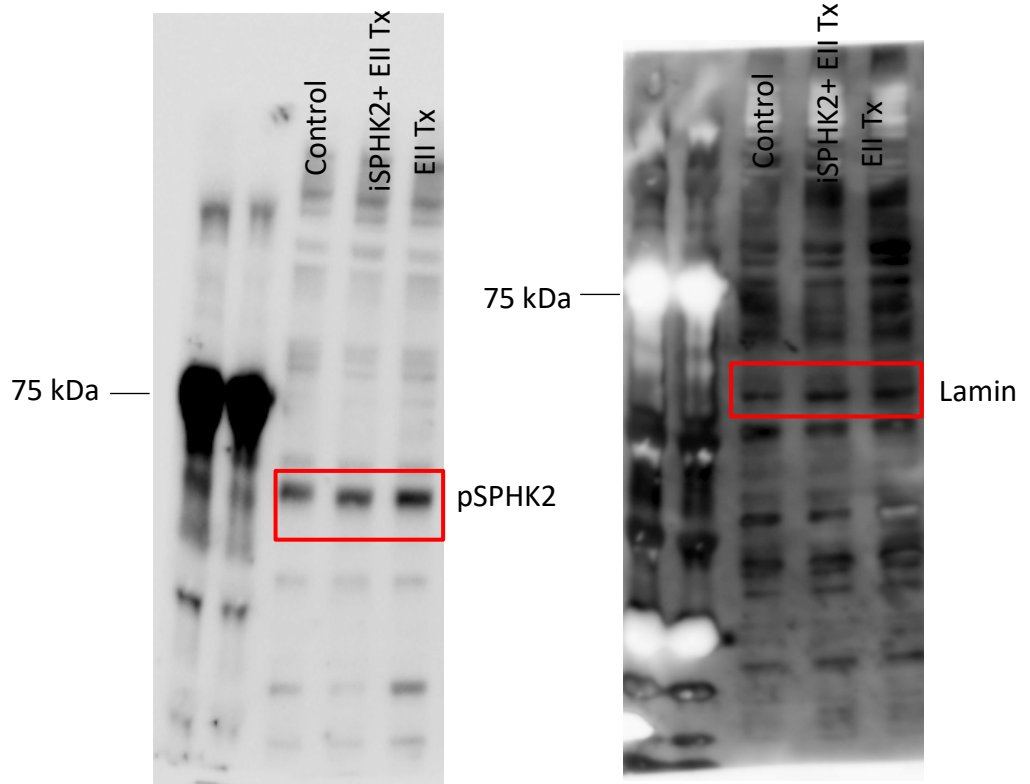

Figure 5A

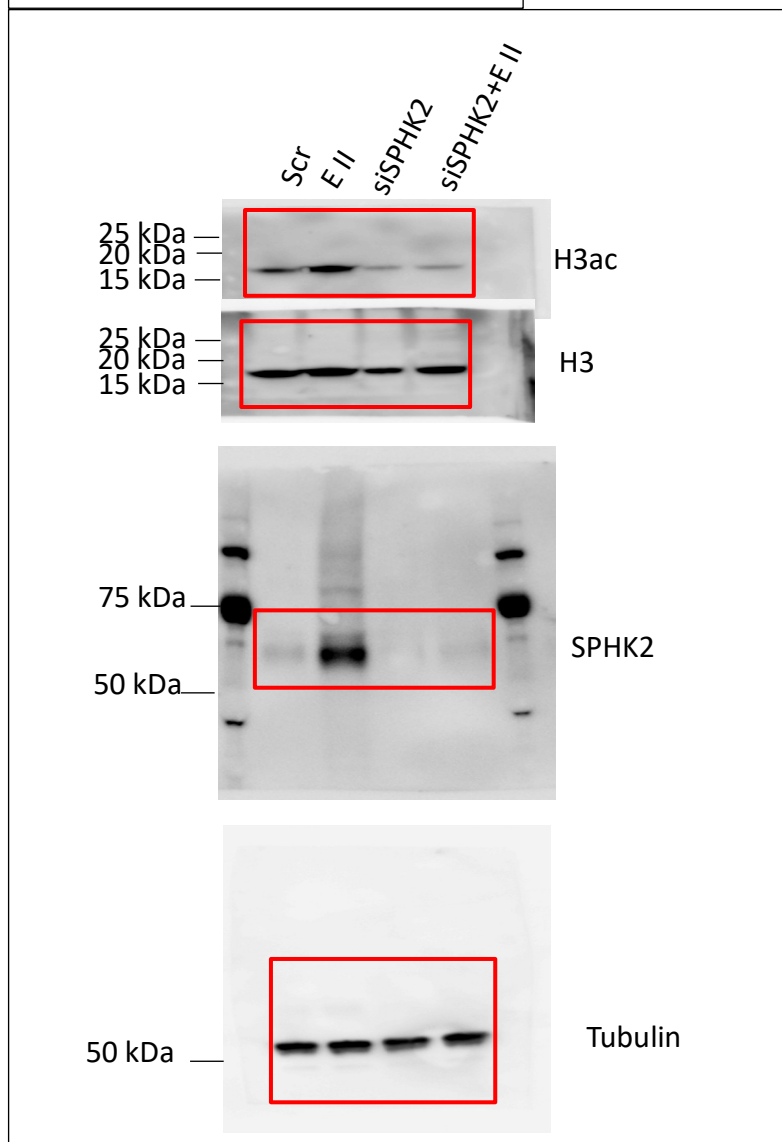

Figure 6C

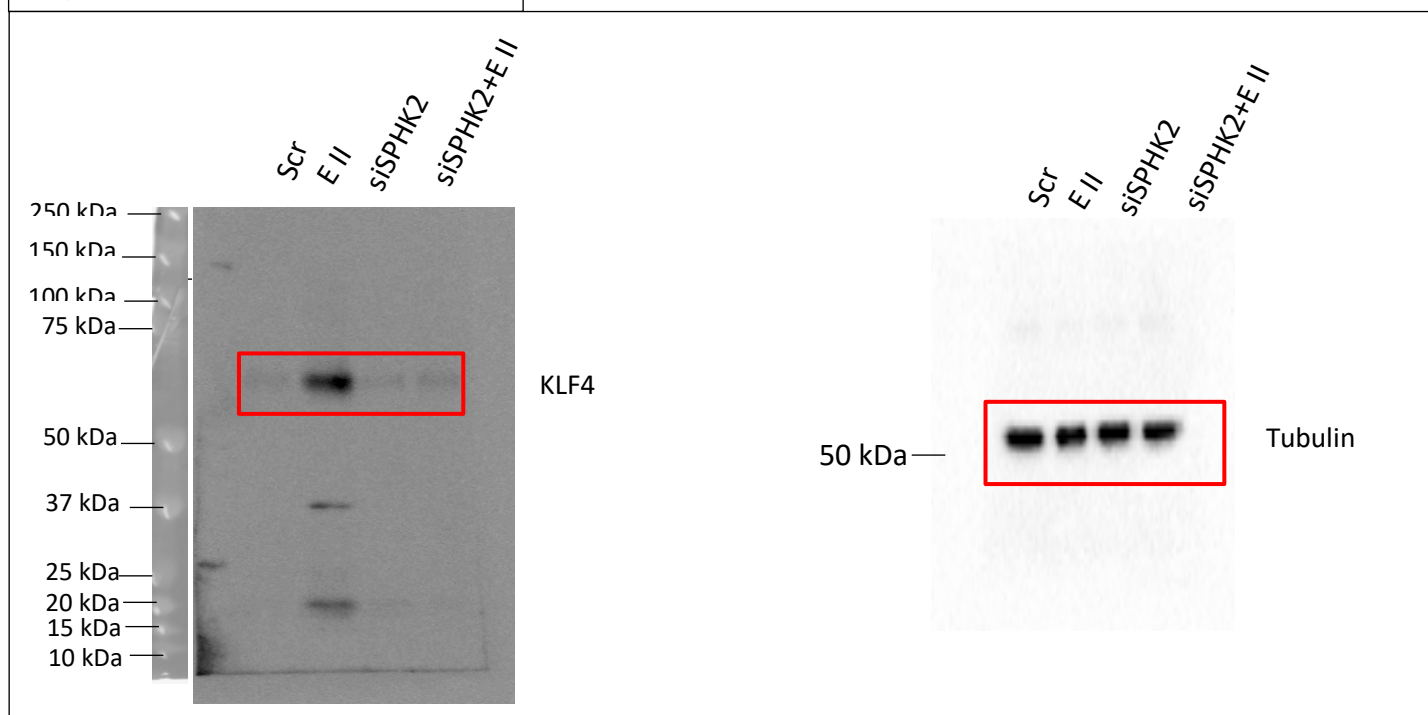

Figure 7C

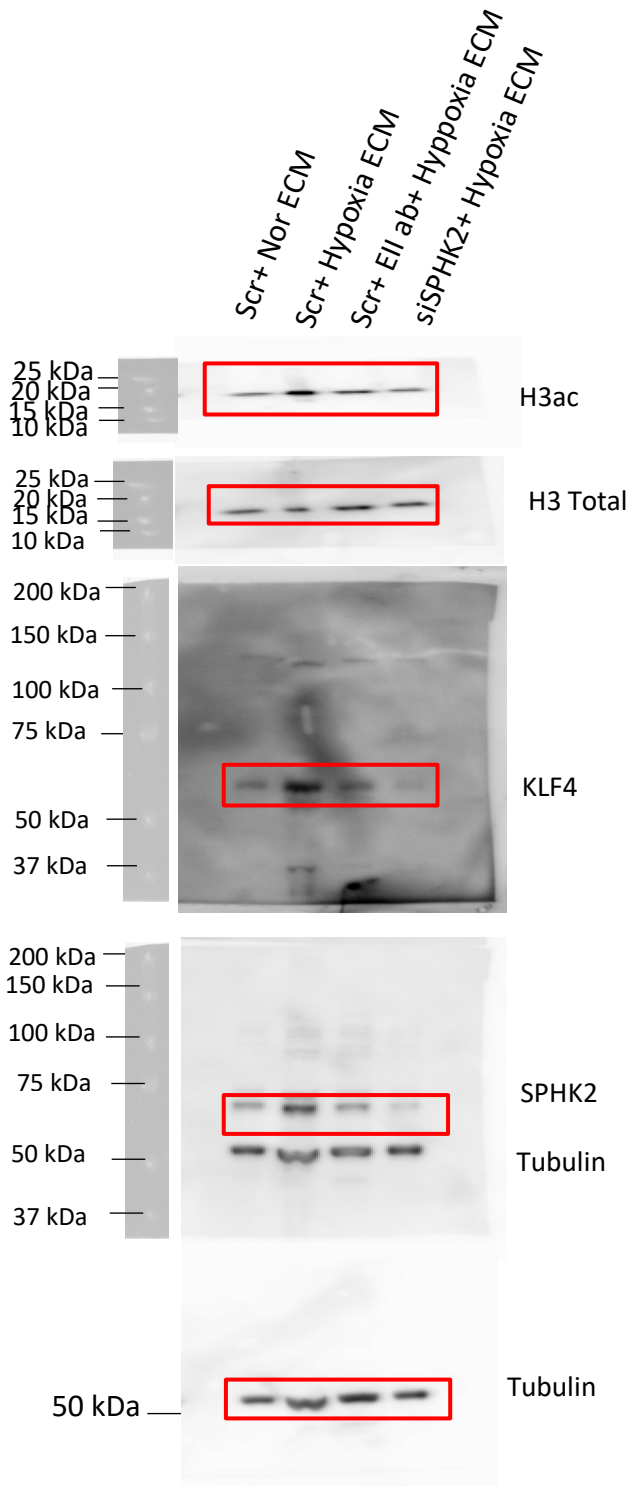

Figure 8B

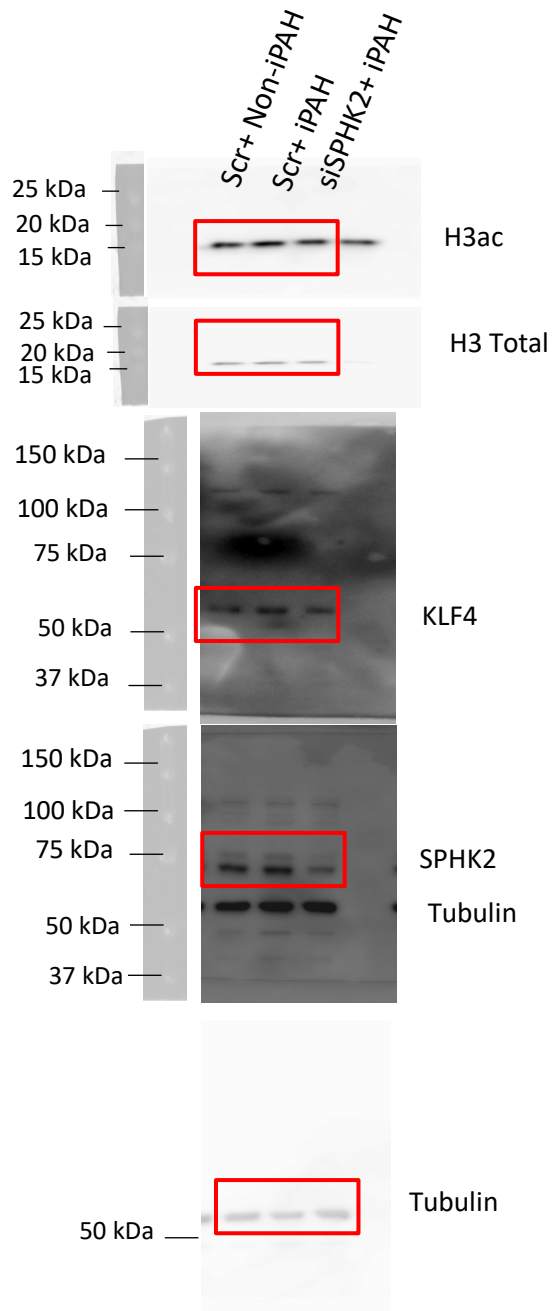



Figure S3C

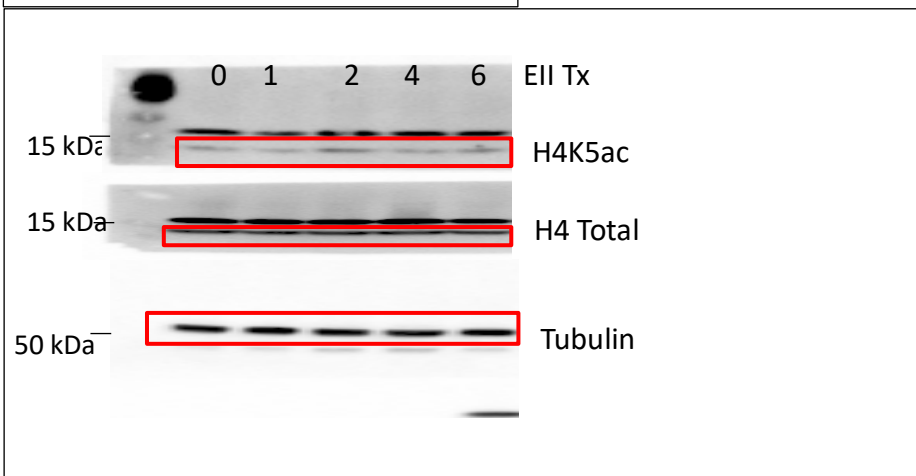

Figure S3D

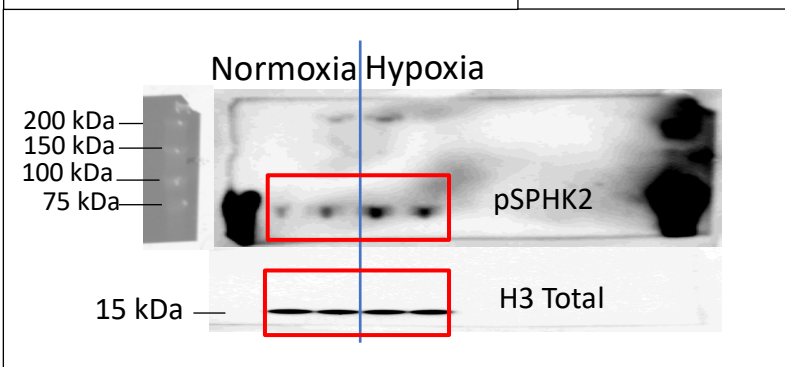

Figure S3E

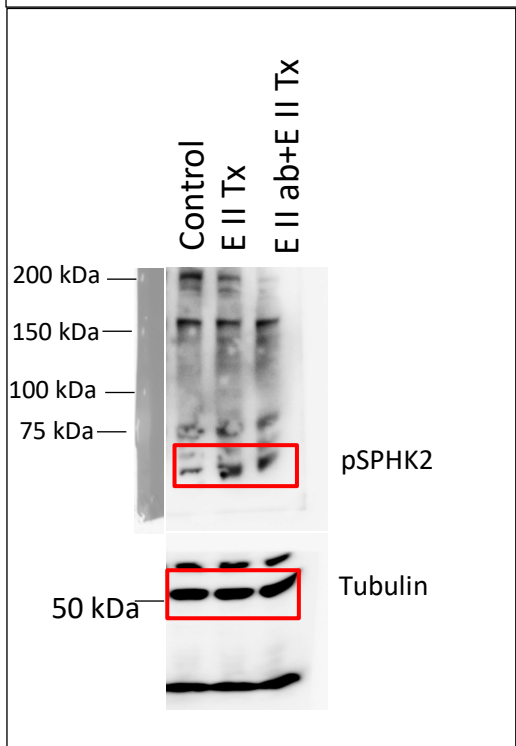

Figure S3F

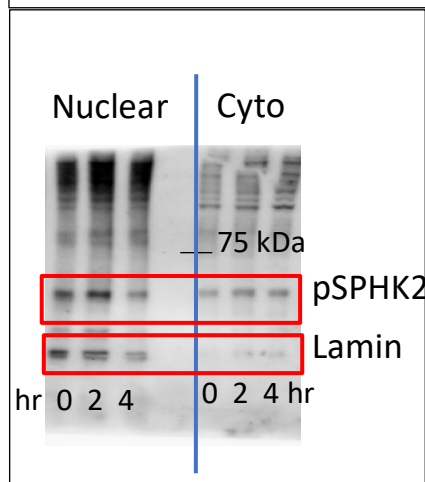

Figure S3H

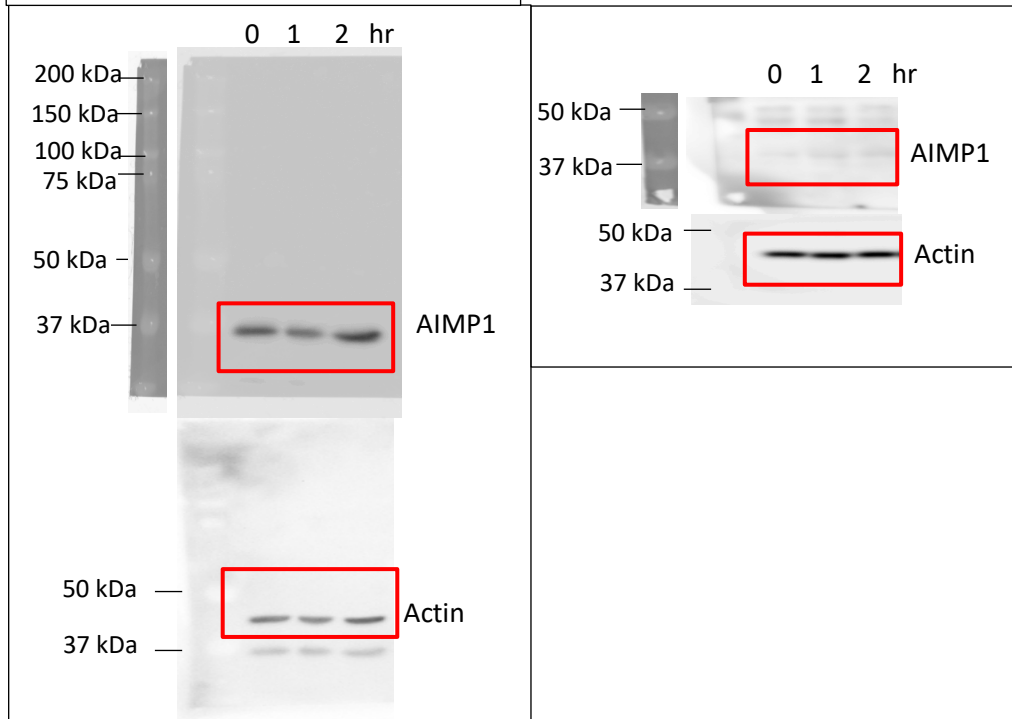

Figure S4B

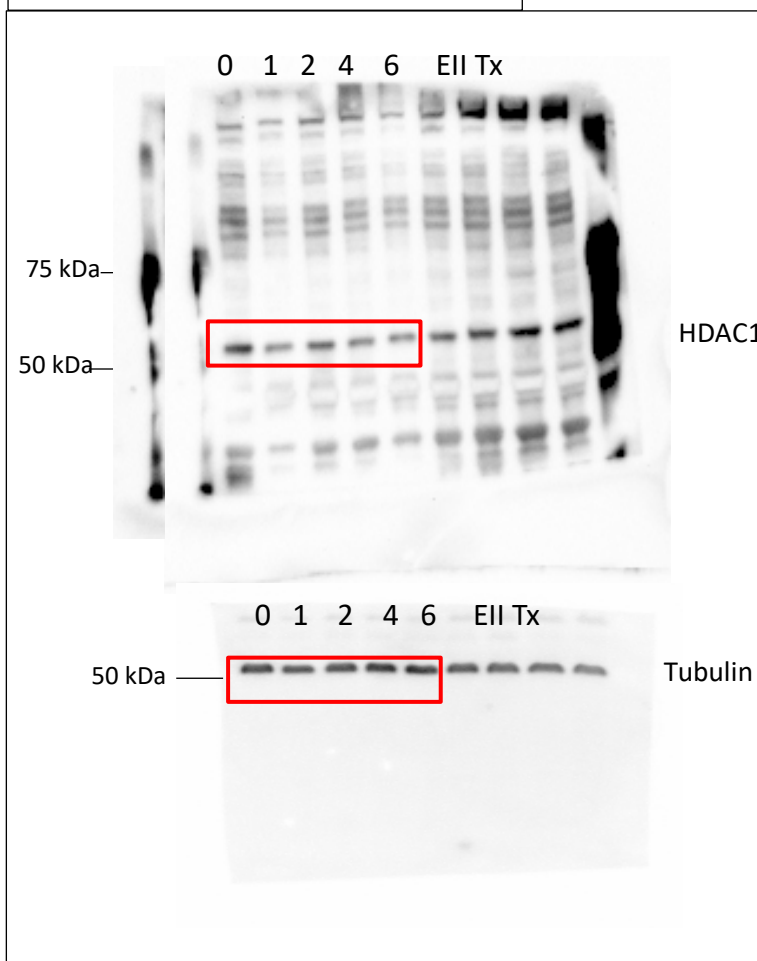

Figure S4C

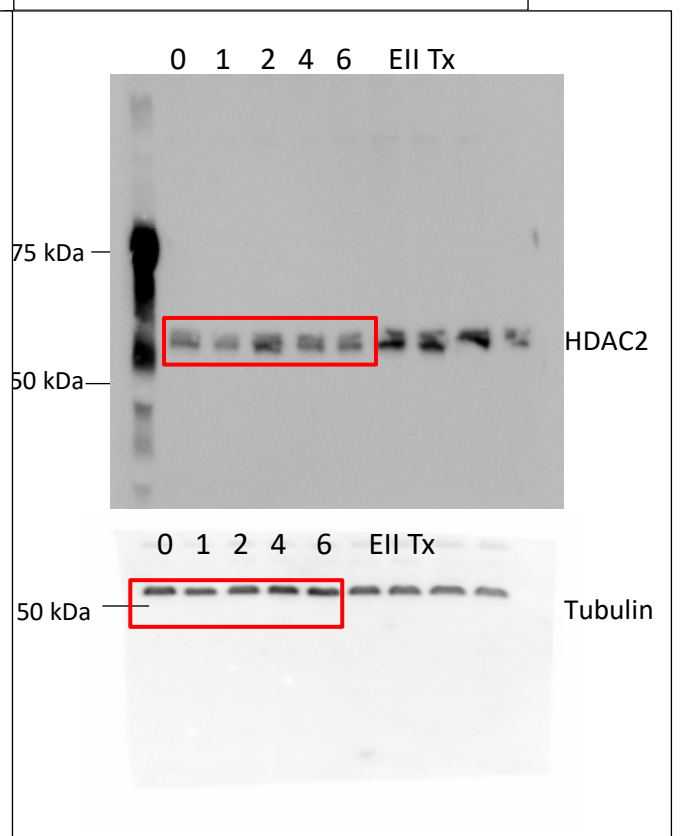

Figure S5B

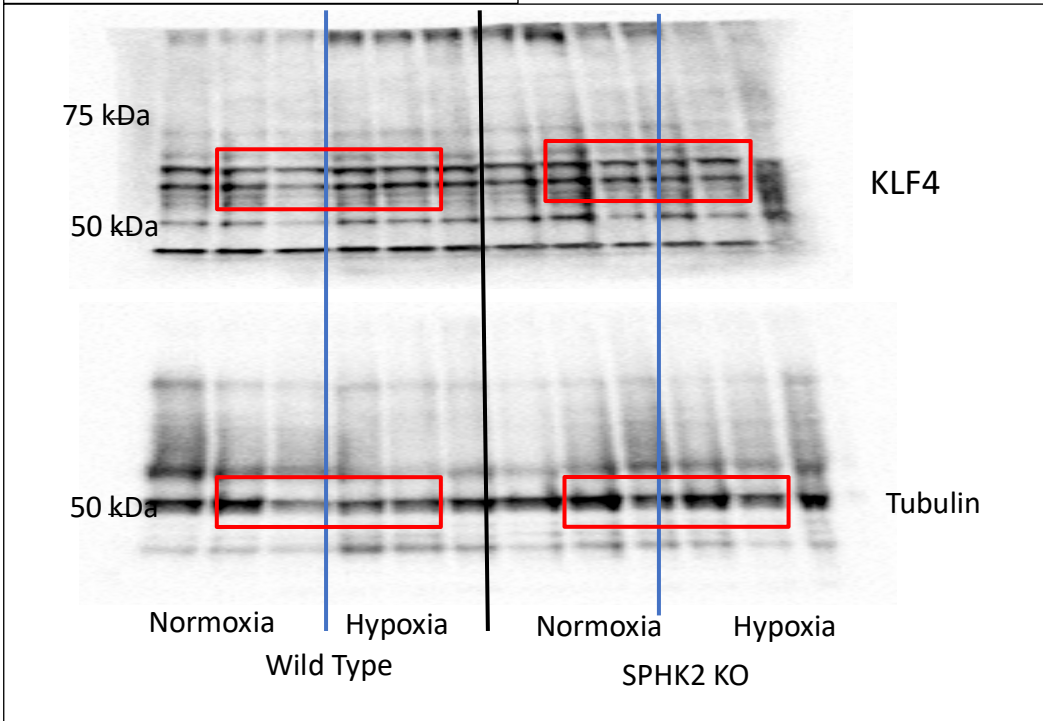

Figure S5F

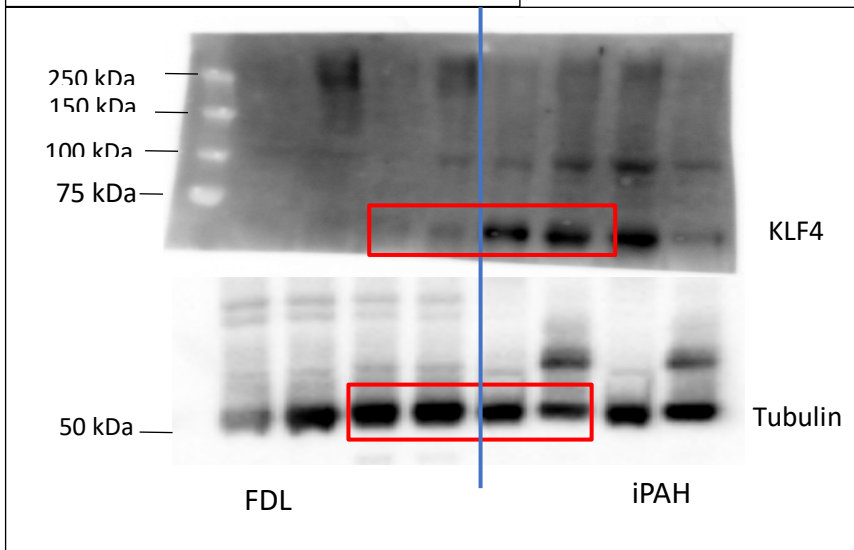

Figure S5H

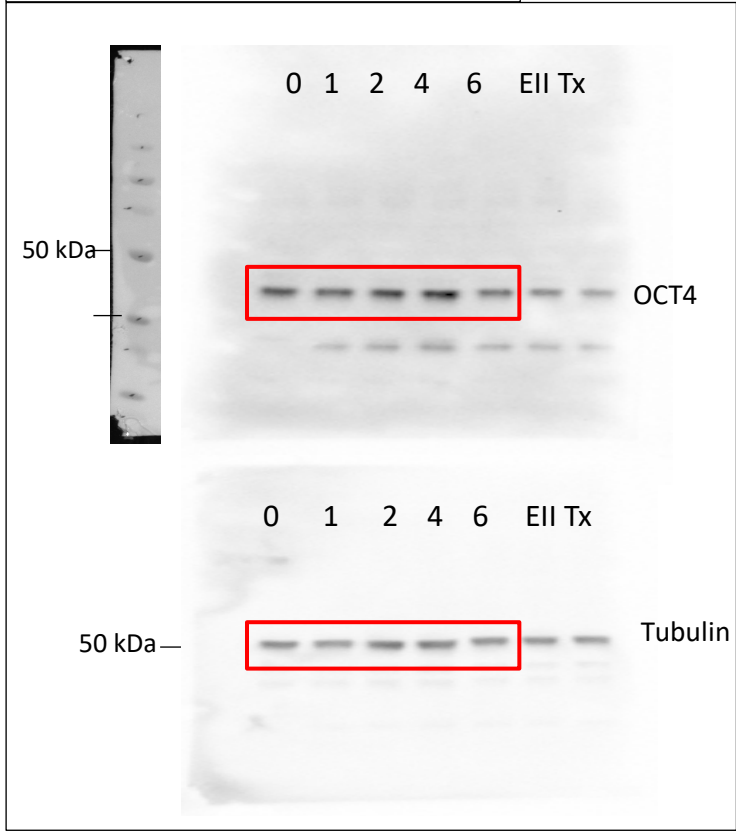

Figure S5I

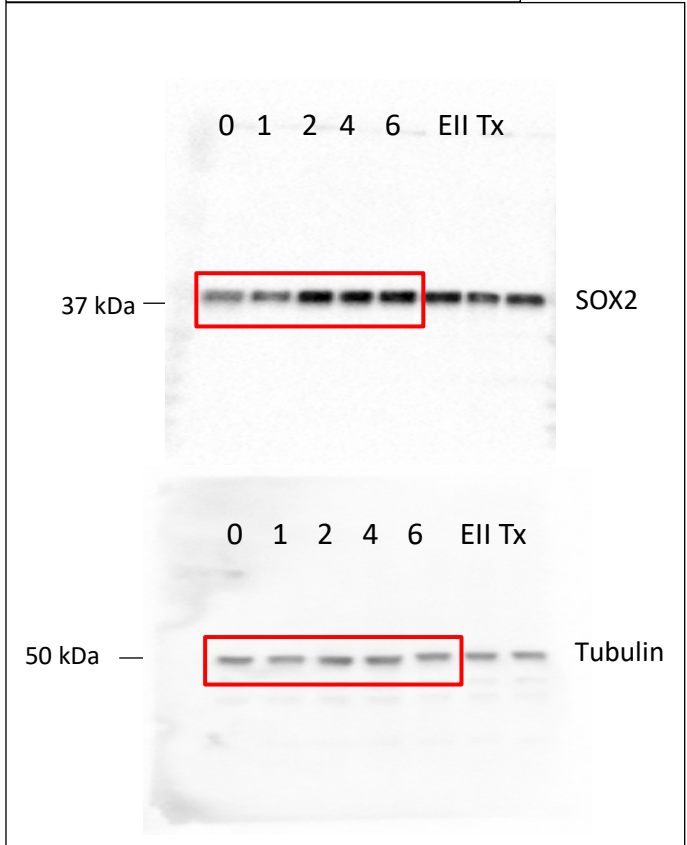

Supplement: NIHMS1928619-supplement-322740_Uncut_Gel_Blots.pdf [file NIHMS1928619-supplement-322740_Uncut_Gel_Blots.pdf]
