# Supplementary material
Source: PubMed Central journal article supplement (PMC10543610)
Supplement: NIHMS1928619-supplement-322740_Data_Set.pdf [file NIHMS1928619-supplement-322740_Data_Set.pdf]

## SUPPLEMENTARY TABLES: CUT&RUN-SEQUENCING DATA

Table 1. Differentially acetylated upstream loci with fold enrichment  $\geq 2$  in EMAPII treated PSMCs are tabulated. ChIPseeker for ChIP peak annotation and visualization (Galaxy Version 1.18.0+galaxy1) was used.

| Chromosome | Gene         | Start     | End       | Fold Enrichment | p value  | FDR      |
|------------|--------------|-----------|-----------|-----------------|----------|----------|
| chr3       | KPNA4        | 160565048 | 160565523 | 4.78            | 5.79E-10 | 3.53E-06 |
| chr5       | CNOT6        | 180494600 | 180494790 | 4.58            | 6.13E-06 | 0.000141 |
| chr1       | NOTCH2NLB    | 148677035 | 148679726 | 4.42            | 1.73E-05 | 0.00026  |
| chr1       | LOC100996720 | 120914148 | 120915301 | 4.36            | 0.00148  | 0.00433  |
| chr15      | CDAN1        | 42736690  | 42737070  | 4.29            | 1.49E-08 | 7.12E-06 |
| chr12      | NUDT4        | 93377901  | 93378124  | 4.24            | 7.23E-05 | 0.000598 |
| chr17      | MFSD11       | 76737619  | 76737864  | 4.24            | 3.65E-06 | 0.00011  |
| chr1       | COX20        | 244835365 | 244835549 | 4.16            | 2.40E-05 | 0.000315 |
| chr17      | LOC728392    | 5500879   | 5501122   | 4.12            | 7.95E-06 | 0.000165 |
| chr1       | LOC112268218 | 1744464   | 1745993   | 4.09            | 0.00349  | 0.00805  |
| chr10      | LOC101929234 | 75408424  | 75408878  | 4.07            | 6.93E-06 | 0.000151 |
| chr10      | SUFU         | 102504001 | 102504170 | 4.02            | 1.91E-05 | 0.000275 |
| chr22      | KLHDC7B      | 50548114  | 50548415  | 3.96            | 4.05E-05 | 0.000423 |
| chr7       | TRIM74       | 73005162  | 73005894  | 3.92            | 0.00493  | 0.0104   |
| chr9       | ANP32B       | 97983536  | 97983941  | 3.92            | 9.37E-07 | 5.29E-05 |
| chr12      | CD9          | 6199880   | 6200121   | 3.91            | 2.93E-05 | 0.000354 |
| chr17      | NR1D1        | 40100944  | 40101213  | 3.88            | 0.000414 | 0.00179  |
| chr22      | HIC2         | 21417897  | 21418281  | 3.86            | 0.000102 | 0.000731 |
| chr19      | ZNF787       | 56110680  | 56110923  | 3.83            | 3.12E-05 | 0.000369 |
| chr12      | ASIC1        | 50057222  | 50057502  | 3.79            | 2.33E-05 | 0.00031  |
| chr1       | LOC105378954 | 120341435 | 120342181 | 3.77            | 0.00765  | 0.0146   |
| chr17      | TAX1BP3      | 3668214   | 3668571   | 3.77            | 4.48E-06 | 0.000119 |
| chr20      | HELZ2        | 63570961  | 63571805  | 3.75            | 0.00902  | 0.0166   |

|       |              |           |           |      |          |          |
|-------|--------------|-----------|-----------|------|----------|----------|
| chr6  | ARID1B       | 156777888 | 156778174 | 3.74 | 5.48E-05 | 0.000507 |
| chr17 | CBX4         | 79838659  | 79838850  | 3.67 | 8.45E-05 | 0.00066  |
| chr8  | TMEM65       | 124372171 | 124372390 | 3.65 | 4.40E-05 | 0.000442 |
| chr2  | PLEKHH2      | 43637299  | 43637495  | 3.6  | 8.57E-05 | 0.000665 |
| chr17 | DDX52        | 37642714  | 37643369  | 3.57 | 0.0135   | 0.023    |
| chr11 | C11orf96     | 43942904  | 43943226  | 3.56 | 4.25E-05 | 0.000433 |
| chr3  | PRRT3-AS1    | 9947375   | 9947659   | 3.55 | 3.99E-05 | 0.000419 |
| chr19 | R3HDM4       | 912779    | 912991    | 3.54 | 3.10E-05 | 0.000368 |
| chr2  | LOC105377635 | 87348172  | 87348652  | 3.53 | 0.0151   | 0.0252   |
| chr3  | KPNA1        | 122514558 | 122514896 | 3.49 | 4.06E-06 | 0.000114 |
| chr1  | BCAR3        | 93847111  | 93847533  | 3.45 | 1.78E-06 | 7.69E-05 |
| chr3  | ATP1B3       | 141876694 | 141876973 | 3.45 | 6.05E-05 | 0.000538 |
| chr12 | DRAM1        | 101877126 | 101877465 | 3.44 | 2.47E-05 | 0.00032  |
| chr19 | UBA52        | 18571357  | 18571534  | 3.43 | 5.68E-05 | 0.000518 |
| chr2  | YPEL5        | 30146974  | 30147289  | 3.4  | 4.56E-08 | 1.06E-05 |
| chr6  | MARCKS       | 113859936 | 113860144 | 3.4  | 0.000259 | 0.00133  |
| chr2  | TMEM17       | 62505722  | 62506169  | 3.38 | 3.43E-05 | 0.000385 |
| chr3  | LINC02043    | 186827165 | 186827457 | 3.38 | 5.31E-06 | 0.000131 |
| chr4  | HAND2        | 173529579 | 173529855 | 3.34 | 3.95E-05 | 0.000416 |
| chr16 | EEF2KMT      | 5098449   | 5098815   | 3.33 | 0.000387 | 0.00171  |
| chr18 | PARD6G       | 80246699  | 80247329  | 3.33 | 2.17E-05 | 0.000296 |
| chr5  | RICTOR       | 39074151  | 39074343  | 3.32 | 6.34E-06 | 0.000144 |
| chr2  | LOC107985959 | 168247768 | 168248146 | 3.31 | 2.78E-05 | 0.000345 |
| chr12 | SRGAP1       | 63844056  | 63844302  | 3.29 | 9.55E-06 | 0.000184 |
| chr13 | PRECSIT      | 110869870 | 110870211 | 3.29 | 0.000184 | 0.00106  |
| chr17 | SOCS3        | 78359402  | 78359854  | 3.29 | 1.15E-05 | 0.000207 |
| chr6  | TAB2         | 149317131 | 149317436 | 3.29 | 0.000147 | 0.000926 |
| chr12 | CHD4         | 6607059   | 6607373   | 3.28 | 3.45E-05 | 0.000386 |
| chr17 | DBIL5P       | 752080    | 752841    | 3.28 | 3.04E-06 | 0.000102 |
| chr8  | ZBTB10       | 80486254  | 80486544  | 3.27 | 1.99E-05 | 0.00028  |
| chr11 | LUZP2        | 24497068  | 24497479  | 3.24 | 6.14E-06 | 0.000142 |

|       |              |           |           |      |          |          |
|-------|--------------|-----------|-----------|------|----------|----------|
| chr10 | LARP4B       | 932031    | 932384    | 3.23 | 7.84E-05 | 0.000631 |
| chr15 | LOC112267869 | 84499904  | 84500738  | 3.21 | 0.000261 | 0.00133  |
| chr17 | UBE2G1       | 4365648   | 4366582   | 3.2  | 3.29E-11 | 6.02E-07 |
| chr8  | PLEC         | 143952307 | 143952779 | 3.2  | 1.99E-05 | 0.00028  |
| chr14 | NFKBIA       | 35404447  | 35404643  | 3.19 | 8.04E-05 | 0.00064  |
| chr2  | ITM2C        | 230864948 | 230865501 | 3.19 | 2.67E-05 | 0.000336 |
| chr8  | SHARPIN      | 144103878 | 144104263 | 3.18 | 6.34E-05 | 0.000556 |
| chr12 | FBXW8        | 116910730 | 116910927 | 3.17 | 0.000203 | 0.00113  |
| chr13 | DOCK9-DT     | 99087285  | 99087635  | 3.17 | 8.41E-05 | 0.000658 |
| chr14 | FERMT2       | 52951404  | 52951699  | 3.17 | 0.000145 | 0.000919 |
| chr22 | DENND6B      | 50327176  | 50327818  | 3.17 | 1.32E-06 | 6.52E-05 |
| chr7  | EZH2         | 148883689 | 148884073 | 3.17 | 2.25E-06 | 8.51E-05 |
| chr15 | TLNRD1       | 81001105  | 81001330  | 3.16 | 0.000102 | 0.000731 |
| chr11 | MYO7A        | 77127092  | 77127475  | 3.15 | 0.000231 | 0.00123  |
| chr17 | FBXL20       | 39401859  | 39402514  | 3.15 | 1.26E-06 | 6.40E-05 |
| chr2  | STARD7       | 96208439  | 96208826  | 3.15 | 1.01E-05 | 0.000191 |
| chr4  | KLF3-AS1     | 38664353  | 38664630  | 3.15 | 6.33E-05 | 0.000555 |
| chrX  | ZXDB         | 57592236  | 57592971  | 3.13 | 7.00E-07 | 4.59E-05 |
| chr2  | EHD3         | 31234486  | 31234914  | 3.12 | 0.000111 | 0.000775 |
| chr5  | MAP3K1       | 56814918  | 56815217  | 3.1  | 0.000681 | 0.0025   |
| chrX  | ELK1         | 47650149  | 47650398  | 3.1  | 0.000436 | 0.00185  |
| chr1  | DUSP10       | 221742426 | 221743088 | 3.08 | 7.34E-07 | 4.70E-05 |
| chr19 | MIR935       | 53979750  | 53980253  | 3.07 | 7.76E-06 | 0.000163 |
| chr2  | VPS54        | 64019137  | 64019345  | 3.07 | 0.000275 | 0.00138  |
| chr3  | FNDC3B       | 172039613 | 172040247 | 3.07 | 4.82E-07 | 3.72E-05 |
| chr7  | RNF216P1     | 4974466   | 4974808   | 3.07 | 3.99E-05 | 0.000419 |
| chr10 | SLC25A28     | 99620821  | 99621286  | 3.06 | 0.00011  | 0.000768 |
| chr17 | TOB1         | 50866075  | 50866323  | 3.06 | 0.000114 | 0.000787 |
| chr19 | ZSCAN18      | 58097875  | 58098192  | 3.05 | 0.000198 | 0.00112  |
| chr20 | PYGB         | 25248183  | 25248419  | 3.05 | 0.000602 | 0.00231  |
| chr10 | COMTD1       | 75235207  | 75236023  | 3.04 | 3.79E-08 | 9.50E-06 |

|       |              |           |           |      |          |          |
|-------|--------------|-----------|-----------|------|----------|----------|
| chr12 | DAZAP2       | 51238876  | 51239114  | 3.04 | 0.000131 | 0.000858 |
| chr15 | SEMA7A       | 74433326  | 74433704  | 3.04 | 6.34E-06 | 0.000144 |
| chr20 | MAFB         | 40687344  | 40687818  | 3.04 | 0.000272 | 0.00137  |
| chr15 | DNM1P46      | 99806256  | 99806924  | 3.02 | 0.0205   | 0.0323   |
| chr16 | CRAMP1       | 1614564   | 1614761   | 3.02 | 0.000553 | 0.00216  |
| chr8  | PUF60        | 143827748 | 143829272 | 3.02 | 1.52E-06 | 7.09E-05 |
| chr14 | DHRS4L1      | 24036467  | 24036875  | 3    | 0.000115 | 0.000791 |
| chr22 | HIC2         | 21420218  | 21420415  | 3    | 0.0173   | 0.0281   |
| chrX  | LOC107985687 | 40105740  | 40106224  | 3    | 4.83E-05 | 0.000468 |
| chr6  | MDGA1        | 37697156  | 37697541  | 2.99 | 0.000372 | 0.00167  |
| chr11 | RNF169       | 74748834  | 74749095  | 2.98 | 0.000207 | 0.00115  |
| chr20 | LOC102723814 | 63519963  | 63520599  | 2.98 | 1.55E-06 | 7.17E-05 |
| chr12 | CDK17        | 96400684  | 96401370  | 2.97 | 4.92E-07 | 3.75E-05 |
| chr12 | ARHGEF25     | 57611375  | 57611759  | 2.96 | 4.23E-05 | 0.000433 |
| chr11 | DCPS         | 126303618 | 126303944 | 2.95 | 3.35E-05 | 0.000381 |
| chr14 | LOC107984638 | 77027555  | 77028433  | 2.95 | 0.0295   | 0.0439   |
| chr4  | SCD5         | 82798435  | 82799126  | 2.95 | 4.64E-07 | 3.66E-05 |
| chr8  | CSGALNACT1   | 19602437  | 19602703  | 2.95 | 0.00152  | 0.00441  |
| chr1  | SELENON      | 25799731  | 25800123  | 2.94 | 3.97E-05 | 0.000418 |
| chr11 | VWCE         | 61295129  | 61295736  | 2.94 | 1.37E-05 | 0.000228 |
| chr4  | FBXL5        | 15655137  | 15655331  | 2.94 | 0.000515 | 0.00207  |
| chr4  | N4BP2        | 40056185  | 40056765  | 2.94 | 1.67E-05 | 0.000255 |
| chr9  | FANCC        | 95316891  | 95317242  | 2.94 | 0.000258 | 0.00132  |
| chrX  | CDK16        | 47218243  | 47218937  | 2.94 | 3.09E-06 | 0.000103 |
| chr1  | H3-7         | 143905257 | 143905948 | 2.93 | 0.00152  | 0.00442  |
| chr15 | PDE8A        | 84980253  | 84980866  | 2.93 | 1.98E-05 | 0.000279 |
| chr7  | KMT2C        | 152435639 | 152435922 | 2.93 | 7.20E-05 | 0.000598 |
| chr1  | SLC50A1      | 155135377 | 155135745 | 2.92 | 0.000519 | 0.00208  |
| chr16 | CTCF         | 67562991  | 67563537  | 2.92 | 2.86E-08 | 8.21E-06 |
| chr3  | MSL2         | 136195941 | 136196316 | 2.92 | 0.000931 | 0.00313  |
| chr7  | ARL4A        | 12686895  | 12687401  | 2.92 | 0.000243 | 0.00127  |

|       |            |           |           |      |          |          |
|-------|------------|-----------|-----------|------|----------|----------|
| chr12 | LRP1       | 57127747  | 57128290  | 2.91 | 6.24E-07 | 4.32E-05 |
| chr15 | CDIN1      | 36579674  | 36580045  | 2.91 | 4.92E-05 | 0.000474 |
| chr12 | WNK1       | 752579    | 752967    | 2.9  | 1.59E-05 | 0.000249 |
| chr16 | TRP-TGG3-3 | 3159066   | 3159443   | 2.9  | 0.000468 | 0.00194  |
| chr19 | EPOR       | 11383993  | 11384327  | 2.9  | 0.000576 | 0.00223  |
| chrX  | SH3KBP1    | 19886384  | 19886851  | 2.9  | 2.74E-05 | 0.000342 |
| chr16 | CYLD       | 50742371  | 50742771  | 2.89 | 1.55E-05 | 0.000244 |
| chr22 | YDJC       | 21629222  | 21629996  | 2.89 | 1.41E-07 | 1.93E-05 |
| chr6  | MTHFD1L    | 150865348 | 150865633 | 2.89 | 4.00E-05 | 0.000419 |
| chr7  | CCDC71L    | 106660549 | 106661073 | 2.89 | 8.36E-05 | 0.000656 |
| chr7  | EZH2       | 148884503 | 148884820 | 2.89 | 0.000276 | 0.00138  |
| chr7  | SCRN1      | 29989196  | 29989726  | 2.89 | 3.90E-05 | 0.000413 |
| chr9  | VLDLR-AS1  | 2621983   | 2622770   | 2.89 | 3.35E-08 | 8.76E-06 |
| chr12 | DYRK2      | 67648049  | 67648280  | 2.88 | 0.000402 | 0.00175  |
| chr2  | TET3       | 74002785  | 74003280  | 2.88 | 1.60E-06 | 7.32E-05 |
| chr16 | USP10      | 84699555  | 84699869  | 2.87 | 0.000226 | 0.00122  |
| chr19 | CBARP      | 1237015   | 1237660   | 2.87 | 1.44E-07 | 1.93E-05 |
| chr2  | MTHFD2     | 74198625  | 74199130  | 2.87 | 7.94E-06 | 0.000165 |
| chr4  | MCUB       | 109560456 | 109560927 | 2.87 | 4.02E-05 | 0.00042  |
| chr7  | CCT6P3     | 65038389  | 65038577  | 2.86 | 0.000357 | 0.00163  |
| chr8  | UBR5-DT    | 102239412 | 102239880 | 2.86 | 9.94E-06 | 0.00019  |
| chr12 | ANKS1B     | 99984996  | 99985277  | 2.85 | 0.000293 | 0.00143  |
| chr15 | MIR7706    | 85379982  | 85380357  | 2.85 | 0.000201 | 0.00113  |
| chr16 | BBS2       | 56519220  | 56520044  | 2.85 | 2.03E-06 | 8.02E-05 |
| chr5  | CYSTM1     | 140174656 | 140174934 | 2.85 | 0.000137 | 0.00089  |
| chr16 | CHD9       | 53131575  | 53132064  | 2.84 | 6.91E-06 | 0.000151 |
| chr17 | VPS53      | 714071    | 714805    | 2.84 | 1.18E-06 | 6.13E-05 |
| chr17 | TRIM47     | 75877425  | 75877926  | 2.84 | 1.38E-06 | 6.69E-05 |
| chr18 | VAPA       | 9914015   | 9914425   | 2.84 | 5.22E-06 | 0.00013  |
| chr4  | GRPEL1     | 7068383   | 7068807   | 2.83 | 1.11E-05 | 0.000202 |
| chr9  | FAM27C     | 61854347  | 61855170  | 2.83 | 0.0162   | 0.0267   |

|       |           |           |           |      |          |          |
|-------|-----------|-----------|-----------|------|----------|----------|
| chr11 | PRDM10    | 130003372 | 130003862 | 2.82 | 0.000141 | 0.000905 |
| chr19 | ZBTB7A    | 4066805   | 4067029   | 2.82 | 9.45E-05 | 0.000705 |
| chr4  | HNRNPDL   | 82429640  | 82429986  | 2.82 | 4.80E-05 | 0.000467 |
| chr6  | PCMT1     | 149749365 | 149749560 | 2.82 | 0.0158   | 0.0262   |
| chr7  | HOXA1     | 27095643  | 27095970  | 2.82 | 0.00231  | 0.00594  |
| chr12 | RHOF      | 121793805 | 121794281 | 2.81 | 0.000107 | 0.000754 |
| chr2  | OLA1      | 174247843 | 174248539 | 2.81 | 7.75E-07 | 4.79E-05 |
| chr2  | CDC42EP3  | 37671891  | 37672242  | 2.81 | 0.000328 | 0.00154  |
| chr8  | NRG1      | 32548667  | 32549434  | 2.81 | 3.32E-06 | 0.000105 |
| chr9  | EDF1      | 136866094 | 136866312 | 2.81 | 5.27E-05 | 0.000495 |
| chr12 | TMPO      | 98515649  | 98516147  | 2.8  | 3.90E-06 | 0.000113 |
| chr14 | BRMS1L    | 35826372  | 35827067  | 2.8  | 1.50E-05 | 0.00024  |
| chr17 | MIF4GD-DT | 75271351  | 75271973  | 2.8  | 3.40E-06 | 0.000107 |
| chr4  | CNOT6L    | 77818898  | 77819505  | 2.8  | 2.54E-07 | 2.71E-05 |
| chr8  | ZHX1      | 123274844 | 123275493 | 2.8  | 2.31E-05 | 0.000308 |
| chrX  | PABIR3    | 134796642 | 134797129 | 2.8  | 1.39E-05 | 0.000229 |
| chr1  | PGD       | 10399092  | 10399317  | 2.79 | 1.29E-05 | 0.000219 |
| chr1  | SFPQ      | 35192359  | 35193114  | 2.79 | 0.0197   | 0.0313   |
| chr10 | JMJD1C    | 63521501  | 63521819  | 2.79 | 0.000107 | 0.000756 |
| chr8  | SLC25A37  | 23528959  | 23529252  | 2.79 | 0.000134 | 0.000875 |
| chr9  | NTNG2     | 132162231 | 132162539 | 2.79 | 0.000201 | 0.00113  |
| chr1  | THAP3     | 6624770   | 6625382   | 2.78 | 3.99E-06 | 0.000114 |
| chr2  | RFX8      | 101473810 | 101474130 | 2.78 | 0.000157 | 0.000963 |
| chr6  | MYLIP     | 16129130  | 16129457  | 2.78 | 6.03E-05 | 0.000537 |
| chr17 | RAC3      | 82032027  | 82032556  | 2.77 | 5.81E-06 | 0.000137 |
| chr18 | RNF138    | 32092665  | 32092876  | 2.77 | 0.000718 | 0.00259  |
| chr4  | RELL1     | 37685772  | 37686306  | 2.77 | 8.67E-06 | 0.000174 |
| chr4  | CCNI      | 77075525  | 77075784  | 2.77 | 0.000231 | 0.00123  |
| chr8  | CTSB      | 11868342  | 11868692  | 2.77 | 0.000344 | 0.00159  |
| chr10 | ZNF239    | 43573790  | 43574297  | 2.76 | 0.000101 | 0.000728 |
| chr5  | TRIM36    | 115169550 | 115169809 | 2.76 | 0.00189  | 0.00514  |

|                         |              |           |           |      |          |          |
|-------------------------|--------------|-----------|-----------|------|----------|----------|
| chr6                    | EZR          | 158818598 | 158818960 | 2.76 | 2.67E-05 | 0.000337 |
| chrX                    | DYNLT3       | 37846971  | 37847489  | 2.76 | 8.92E-06 | 0.000178 |
| chr1                    | CRYZ         | 74732157  | 74732493  | 2.75 | 0.00586  | 0.0119   |
| chr10                   | DNA2         | 68471555  | 68472150  | 2.75 | 4.31E-05 | 0.000437 |
| chr17                   | GNA13        | 65056321  | 65056586  | 2.75 | 4.53E-05 | 0.00045  |
| chr7                    | FAM126A      | 23013822  | 23014080  | 2.75 | 0.000559 | 0.00218  |
| chrX                    | GSPT2        | 51743472  | 51743991  | 2.75 | 0.000154 | 0.000949 |
| chr1                    | LOC107984913 | 6612655   | 6613128   | 2.74 | 5.32E-05 | 0.000498 |
| chr16                   | PDPK1        | 2537404   | 2537716   | 2.74 | 0.00184  | 0.00504  |
| chr1                    | TMCO4        | 19800026  | 19800425  | 2.73 | 0.000114 | 0.000788 |
| chr14                   | CDKN3        | 54397010  | 54397552  | 2.73 | 1.81E-05 | 0.000268 |
| chr5                    | ARRDC3       | 91383558  | 91383749  | 2.73 | 0.00113  | 0.00358  |
| chr9                    | ENDOG        | 128818487 | 128818668 | 2.73 | 0.00291  | 0.00703  |
| chr10                   | PLCE1        | 93994117  | 93994755  | 2.72 | 2.08E-06 | 8.13E-05 |
| chr11                   | LOC112267904 | 107591342 | 107592134 | 2.72 | 2.92E-08 | 8.21E-06 |
| chr14                   | AP4S1        | 31026610  | 31026818  | 2.72 | 0.00176  | 0.00488  |
| chr5                    | SQSTM1       | 179806014 | 179806304 | 2.72 | 0.000314 | 0.0015   |
| chr6                    | HMGA1        | 34237728  | 34238193  | 2.72 | 6.17E-06 | 0.000142 |
| chr6                    | ZFAND3       | 37820119  | 37820493  | 2.72 | 6.03E-06 | 0.00014  |
| chr7                    | DNAJB6       | 157337040 | 157337214 | 2.72 | 0.000672 | 0.00248  |
| chr10                   | PAOX         | 133379530 | 133379834 | 2.71 | 0.00229  | 0.00591  |
| chr11                   | STIM1-AS1    | 3855178   | 3855512   | 2.71 | 0.000945 | 0.00316  |
| chr17                   | INCA1        | 4997154   | 4997848   | 2.71 | 9.73E-05 | 0.000716 |
| chr19                   | KEAP1        | 10503018  | 10503550  | 2.71 | 1.80E-05 | 0.000267 |
| chr6_GL000255v<br>2_alt | HLA-A        | 1197521   | 1198052   | 2.71 | 0.00157  | 0.00452  |
| chr9                    | PHF19        | 120876664 | 120877004 | 2.71 | 0.000379 | 0.00169  |
| chrX                    | MED14        | 40735121  | 40735880  | 2.71 | 5.53E-05 | 0.000509 |
| chr2                    | LOC102724081 | 168456432 | 168457187 | 2.7  | 1.96E-06 | 7.92E-05 |
| chr2                    | DUSP28       | 240560377 | 240560746 | 2.7  | 6.88E-05 | 0.000583 |
| chr6                    | CEP43        | 166999445 | 167000022 | 2.7  | 0.03     | 0.0445   |

|       |            |           |           |      |          |          |
|-------|------------|-----------|-----------|------|----------|----------|
| chr6  | LINC00680  | 57960876  | 57961386  | 2.7  | 8.37E-06 | 0.00017  |
| chr1  | MAGI3      | 113390450 | 113390844 | 2.69 | 4.02E-05 | 0.00042  |
| chr1  | INTS11     | 1324242   | 1324596   | 2.69 | 1.04E-05 | 0.000195 |
| chr1  | HDGF       | 156746803 | 156747048 | 2.69 | 8.00E-04 | 0.0028   |
| chr11 | RHOG       | 3841184   | 3841726   | 2.69 | 1.10E-05 | 0.000201 |
| chr11 | GAB2       | 78417160  | 78417440  | 2.69 | 0.000166 | 0.000995 |
| chr2  | NOP58      | 202265239 | 202265559 | 2.69 | 7.42E-05 | 0.000609 |
| chr3  | VGLL4      | 11719658  | 11720178  | 2.69 | 4.11E-05 | 0.000427 |
| chr3  | ITGA9-AS1  | 37860856  | 37861443  | 2.69 | 2.88E-06 | 9.88E-05 |
| chr9  | TLE1       | 81688621  | 81689415  | 2.69 | 0.00016  | 0.000974 |
| chrX  | NDUFB11    | 47145299  | 47145519  | 2.69 | 0.00207  | 0.0055   |
| chr1  | TRV-CAC1-1 | 161399851 | 161400391 | 2.68 | 3.80E-06 | 0.000111 |
| chr10 | PCGF5      | 91162348  | 91162808  | 2.68 | 0.000622 | 0.00236  |
| chr19 | OAZ1       | 2269570   | 2270772   | 2.68 | 1.99E-08 | 7.84E-06 |
| chr2  | TBC1D8     | 101150540 | 101150974 | 2.68 | 4.62E-05 | 0.000455 |
| chr6  | GINM1      | 149566396 | 149567286 | 2.68 | 2.28E-07 | 2.53E-05 |
| chr7  | UBE2D4     | 43926072  | 43926365  | 2.68 | 0.00157  | 0.00452  |
| chr10 | ZNF32      | 43648104  | 43648763  | 2.67 | 4.37E-06 | 0.000118 |
| chr10 | SGMS1      | 50418280  | 50418729  | 2.67 | 0.000226 | 0.00122  |
| chr19 | PPP6R1     | 55258617  | 55259004  | 2.67 | 0.000278 | 0.00138  |
| chrX  | ATP11C     | 139932790 | 139932999 | 2.67 | 0.00084  | 0.0029   |
| chr1  | EFCAB2     | 244969699 | 244970609 | 2.66 | 6.21E-08 | 1.25E-05 |
| chr17 | MAP3K3     | 63621596  | 63621898  | 2.65 | 0.000213 | 0.00117  |
| chr2  | B3GNT2     | 62196343  | 62196914  | 2.65 | 3.79E-07 | 3.38E-05 |
| chr9  | TMEFF1     | 100473544 | 100473949 | 2.65 | 0.000221 | 0.0012   |
| chr1  | LMNA       | 156126130 | 156126346 | 2.64 | 0.00111  | 0.00355  |
| chr1  | EFCAB14    | 46719226  | 46719580  | 2.64 | 0.000207 | 0.00115  |
| chr12 | GLS2       | 56487818  | 56488414  | 2.64 | 4.56E-05 | 0.000451 |
| chr15 | DTWD1      | 49621031  | 49621289  | 2.64 | 0.000363 | 0.00164  |
| chr16 | ZNF821     | 71884345  | 71884657  | 2.64 | 0.000138 | 0.000894 |
| chr19 | REX1BD     | 18588804  | 18589492  | 2.64 | 4.22E-05 | 0.000433 |



|                     |              |           |           |      |          |          |
|---------------------|--------------|-----------|-----------|------|----------|----------|
| chr19               | SHANK1       | 50718758  | 50719299  | 2.64 | 4.78E-05 | 0.000465 |
| chr2                | CALM2        | 47175949  | 47176480  | 2.64 | 1.51E-05 | 0.000241 |
| chr22               | MIR6821      | 49961552  | 49962160  | 2.64 | 3.60E-06 | 0.000109 |
| chr5                | B4GALT7      | 177599684 | 177599997 | 2.64 | 0.000478 | 0.00197  |
| chr1                | COQ8A        | 226939425 | 226939909 | 2.63 | 0.000353 | 0.00161  |
| chr16               | WDR59        | 74984575  | 74985109  | 2.63 | 1.13E-05 | 0.000204 |
| chr17               | PPP1R9B      | 50150384  | 50150892  | 2.63 | 2.38E-05 | 0.000314 |
| chr8                | TRIB1        | 125430434 | 125430969 | 2.63 | 1.07E-05 | 0.000198 |
| chr8                | MROH1        | 144146770 | 144147575 | 2.63 | 7.44E-07 | 4.72E-05 |
| chr9                | CDK9         | 127786114 | 127786902 | 2.63 | 3.98E-08 | 9.71E-06 |
| chr4                | LOC105377496 | 153249501 | 153249947 | 2.62 | 4.00E-04 | 0.00175  |
| chr6                | LINC00240    | 26956758  | 26957222  | 2.62 | 0.00291  | 0.00703  |
| chr8                | SORBS3       | 22550972  | 22551638  | 2.62 | 5.97E-05 | 0.000534 |
| chrX                | FAM199X      | 104166713 | 104167065 | 2.62 | 0.000154 | 0.000949 |
| chr1                | C1orf159     | 1115883   | 1116099   | 2.61 | 0.00187  | 0.00511  |
| chr1                | NOTCH2NLA    | 146225603 | 146229004 | 2.61 | 0.000713 | 0.00258  |
| chr3                | GAP43        | 115658717 | 115659099 | 2.61 | 6.57E-05 | 0.000565 |
| chr4                | RAPGEF2      | 159102581 | 159102902 | 2.61 | 0.000125 | 0.000837 |
| chrX                | PJA1         | 69164975  | 69165394  | 2.61 | 1.28E-05 | 0.000218 |
| chr16               | ATXN2L       | 28823236  | 28824284  | 2.6  | 1.04E-07 | 1.65E-05 |
| chr19               | NOTCH3       | 15200310  | 15200805  | 2.6  | 2.74E-05 | 0.000342 |
| chr21               | LOC102724652 | 6497545   | 6498961   | 2.6  | 0.0134   | 0.0229   |
| chr3                | NRADDP       | 47009600  | 47009931  | 2.6  | 0.00139  | 0.00415  |
| chr6                | RRAGD        | 89411039  | 89412074  | 2.6  | 1.00E-05 | 0.000191 |
| chr8                | LOC105375630 | 88327696  | 88328750  | 2.6  | 9.22E-09 | 5.16E-06 |
| chrX_KI270880v1_alt | LINC00685    | 29        | 1270      | 2.6  | 0.0322   | 0.0471   |
| chr1                | LINC01635    | 22025530  | 22026025  | 2.59 | 1.02E-05 | 0.000193 |
| chr7                | MAFK         | 1537464   | 1538009   | 2.59 | 1.45E-05 | 0.000235 |
| chr1                | PIK3CD       | 9689922   | 9690461   | 2.58 | 2.62E-05 | 0.000333 |
| chr11               | DIXDC1       | 111937212 | 111937615 | 2.58 | 0.000801 | 0.0028   |

|       |              |           |           |      |          |          |
|-------|--------------|-----------|-----------|------|----------|----------|
| chr2  | TNS1         | 217858273 | 217858676 | 2.58 | 0.000728 | 0.00261  |
| chr20 | GNAS         | 58891759  | 58892362  | 2.58 | 9.06E-06 | 0.000178 |
| chr6  | FOXO3        | 108557358 | 108557817 | 2.58 | 4.00E-04 | 0.00175  |
| chr6  | SRF          | 43170348  | 43170697  | 2.58 | 0.000608 | 0.00232  |
| chr7  | GALNT11      | 152025193 | 152025560 | 2.58 | 0.000133 | 0.000869 |
| chr7  | POLD2        | 44123702  | 44124203  | 2.58 | 8.08E-05 | 0.000641 |
| chr9  | ZNF618       | 113876505 | 113876711 | 2.58 | 8.08E-05 | 0.000641 |
| chr10 | BLOC1S2      | 100286276 | 100286658 | 2.57 | 0.000193 | 0.0011   |
| chr14 | ARID4A       | 58298569  | 58299149  | 2.57 | 6.20E-06 | 0.000142 |
| chr19 | DNAJB1       | 14518032  | 14518378  | 2.57 | 0.000133 | 0.000867 |
| chr19 | CEBPG        | 33373039  | 33373509  | 2.57 | 1.28E-05 | 0.000218 |
| chr9  | PRRX2        | 129698798 | 129699166 | 2.57 | 0.00018  | 0.00105  |
| chr1  | MAP10        | 232805488 | 232805815 | 2.56 | 0.0014   | 0.00417  |
| chr10 | PRTFDC1      | 24952936  | 24953183  | 2.56 | 0.00106  | 0.00343  |
| chr11 | HARBI1       | 46616955  | 46617201  | 2.56 | 4.31E-05 | 0.000437 |
| chr13 | FGF14        | 102399961 | 102400825 | 2.56 | 8.28E-05 | 0.000651 |
| chr16 | CLCN7        | 1475163   | 1475704   | 2.56 | 1.18E-05 | 0.000209 |
| chr19 | GATAD2A      | 19405994  | 19406295  | 2.56 | 0.000178 | 0.00104  |
| chr2  | LOC100419920 | 95526580  | 95527438  | 2.56 | 6.11E-06 | 0.000141 |
| chr4  | KIAA0232     | 6782977   | 6783575   | 2.56 | 1.73E-06 | 7.67E-05 |
| chr6  | AMD1         | 110875018 | 110876405 | 2.56 | 1.57E-08 | 7.12E-06 |
| chr6  | LOC105374907 | 7727167   | 7727680   | 2.56 | 0.000138 | 0.000891 |
| chrX  | NKRF         | 119606072 | 119606383 | 2.56 | 0.00152  | 0.0044   |
| chr19 | PTOV1        | 49850756  | 49851054  | 2.55 | 0.000172 | 0.00102  |
| chr20 | ELMO2        | 46405961  | 46406624  | 2.55 | 8.28E-07 | 4.93E-05 |
| chr5  | MACROH2A1    | 135399342 | 135399841 | 2.55 | 0.000133 | 0.00087  |
| chr5  | SLC9A3-AS1   | 473576    | 474979    | 2.55 | 1.27E-07 | 1.80E-05 |
| chr6  | CEP85L       | 118651805 | 118652063 | 2.55 | 0.00109  | 0.0035   |
| chr8  | CSGALNACT1   | 19757396  | 19758054  | 2.55 | 0.000226 | 0.00122  |
| chr15 | FANCI        | 89243393  | 89243867  | 2.54 | 0.000262 | 0.00133  |
| chr16 | MMP25-AS1    | 3058491   | 3059339   | 2.54 | 2.50E-06 | 9.05E-05 |

|       |              |           |           |      |          |          |
|-------|--------------|-----------|-----------|------|----------|----------|
| chr16 | ZCCHC14      | 87491746  | 87492198  | 2.54 | 0.000842 | 0.0029   |
| chr18 | ZNF516-DT    | 76495495  | 76495991  | 2.54 | 0.000139 | 0.000897 |
| chr22 | H1-0         | 37804609  | 37804941  | 2.54 | 0.000249 | 0.00129  |
| chr4  | LOC101927259 | 128553213 | 128553442 | 2.54 | 0.00148  | 0.00434  |
| chr1  | FAM89A       | 231039224 | 231039841 | 2.53 | 5.71E-05 | 0.00052  |
| chr10 | FBH1         | 5889508   | 5889883   | 2.53 | 3.95E-05 | 0.000416 |
| chr11 | NUCB2        | 17276193  | 17276519  | 2.53 | 0.00333  | 0.00777  |
| chr16 | GSPT1        | 11915737  | 11915932  | 2.53 | 0.000672 | 0.00248  |
| chr2  | ERICH2       | 170771075 | 170771569 | 2.53 | 4.25E-05 | 0.000433 |
| chr5  | ADRB2        | 148825952 | 148826357 | 2.53 | 0.000113 | 0.000786 |
| chr6  | MOCS1        | 39933897  | 39934495  | 2.53 | 6.39E-05 | 0.000558 |
| chr9  | INPP5E       | 136439621 | 136439811 | 2.53 | 0.00126  | 0.00387  |
| chr1  | PTGFRN       | 116910505 | 116910908 | 2.52 | 0.000117 | 0.000799 |
| chr1  | HIVEP3       | 42035172  | 42035537  | 2.52 | 0.00138  | 0.00413  |
| chr1  | KLHL21       | 6602245   | 6602546   | 2.52 | 0.000997 | 0.00328  |
| chr11 | ATL3         | 63671052  | 63671658  | 2.52 | 1.24E-05 | 0.000214 |
| chr11 | FADD         | 70203321  | 70203587  | 2.52 | 0.00251  | 0.00633  |
| chr11 | TUB          | 8019335   | 8019594   | 2.52 | 0.0049   | 0.0103   |
| chr15 | ANP32A       | 68818260  | 68818644  | 2.52 | 1.24E-05 | 0.000214 |
| chr2  | SH3RF3       | 109128536 | 109129064 | 2.52 | 8.70E-05 | 0.00067  |
| chr2  | CREB1        | 207530138 | 207530349 | 2.52 | 0.000271 | 0.00137  |
| chrX  | ZFX          | 24149440  | 24149672  | 2.52 | 0.00327  | 0.00766  |
| chrX  | FGD1         | 54494881  | 54495372  | 2.52 | 2.05E-05 | 0.000285 |
| chr1  | EMBP1        | 121519087 | 121519580 | 2.51 | 0.00133  | 0.00403  |
| chr12 | STRAP        | 15881842  | 15882237  | 2.51 | 1.67E-05 | 0.000255 |
| chr15 | ANXA2        | 60398208  | 60398715  | 2.51 | 1.87E-05 | 0.000272 |
| chr16 | NAA60        | 3457319   | 3457894   | 2.51 | 6.68E-05 | 0.000572 |
| chr17 | FGF11        | 7438005   | 7438547   | 2.51 | 0.000696 | 0.00254  |
| chr1  | NTNG1        | 107141467 | 107141836 | 2.5  | 0.000176 | 0.00104  |
| chr1  | ZNF644       | 91021803  | 91022047  | 2.5  | 0.000127 | 0.000842 |
| chr11 | FAM86C2P     | 67804639  | 67805267  | 2.5  | 7.30E-06 | 0.000157 |

|       |              |           |           |      |          |          |
|-------|--------------|-----------|-----------|------|----------|----------|
| chr12 | ARID2        | 45729179  | 45729583  | 2.5  | 0.000197 | 0.00111  |
| chr15 | TCF12        | 56919163  | 56919434  | 2.5  | 0.000864 | 0.00296  |
| chr2  | TMEM131      | 97995737  | 97996151  | 2.5  | 0.000286 | 0.0014   |
| chr3  | CHST2        | 143119945 | 143120675 | 2.5  | 2.24E-05 | 0.000302 |
| chr3  | LOC101928234 | 38165265  | 38165700  | 2.5  | 0.000737 | 0.00264  |
| chr5  | ISL1-DT      | 51382679  | 51383212  | 2.5  | 0.000122 | 0.000821 |
| chr6  | PACRG        | 162727243 | 162727749 | 2.5  | 0.000104 | 0.000742 |
| chr8  | YWHAZ        | 100951428 | 100951976 | 2.5  | 1.05E-05 | 0.000195 |
| chr8  | DGAT1        | 144327065 | 144327243 | 2.5  | 0.00357  | 0.00817  |
| chr9  | IER5L        | 129177827 | 129178170 | 2.5  | 0.000218 | 0.00119  |
| chr9  | TLE4         | 79572746  | 79573047  | 2.5  | 0.000786 | 0.00277  |
| chrX  | RNF128       | 106726738 | 106727192 | 2.5  | 0.000272 | 0.00137  |
| chr11 | PRDX5        | 64318148  | 64318664  | 2.49 | 0.000205 | 0.00114  |
| chr19 | RAVER1       | 10333786  | 10334095  | 2.49 | 0.00259  | 0.00647  |
| chr19 | ILF3         | 10654370  | 10654683  | 2.49 | 0.000311 | 0.00149  |
| chr19 | ZNF14        | 19732350  | 19733076  | 2.49 | 1.22E-09 | 4.24E-06 |
| chr19 | VASP         | 45507078  | 45507716  | 2.49 | 2.33E-06 | 8.65E-05 |
| chr21 | PFKL         | 44299429  | 44299954  | 2.49 | 8.47E-05 | 0.000661 |
| chr8  | PDGFRL       | 17577192  | 17578059  | 2.49 | 1.98E-06 | 7.94E-05 |
| chr8  | PDE7A        | 65841750  | 65841928  | 2.49 | 0.00524  | 0.0109   |
| chrX  | CLCN5        | 49922715  | 49923484  | 2.49 | 2.33E-05 | 0.00031  |
| chr1  | FAM72D       | 145091370 | 145095313 | 2.48 | 0.0115   | 0.0203   |
| chr1  | RCOR3        | 211259454 | 211259769 | 2.48 | 0.000577 | 0.00223  |
| chr1  | AK4          | 65147858  | 65148261  | 2.48 | 0.0011   | 0.00353  |
| chr12 | FAR2         | 29149279  | 29149792  | 2.48 | 0.000151 | 0.000942 |
| chr13 | DLEU2        | 50124703  | 50125369  | 2.48 | 2.31E-05 | 0.000308 |
| chr17 | LASP1        | 38870097  | 38870628  | 2.48 | 4.24E-05 | 0.000433 |
| chr21 | BACE2        | 41168504  | 41168901  | 2.48 | 9.41E-05 | 0.000704 |
| chr7  | POM121       | 72925169  | 72925572  | 2.48 | 0.000245 | 0.00128  |
| chrX  | RPL10        | 154396990 | 154398082 | 2.48 | 1.65E-06 | 7.48E-05 |
| chr1  | CLIC4        | 24745382  | 24745702  | 2.47 | 0.000169 | 0.00101  |

|       |            |           |           |      |          |          |
|-------|------------|-----------|-----------|------|----------|----------|
| chr16 | JMJD8      | 683363    | 683953    | 2.47 | 3.47E-05 | 0.000387 |
| chr4  | SH3BP2     | 2818528   | 2818906   | 2.47 | 0.000483 | 0.00199  |
| chr5  | AFAP1L1    | 149272096 | 149272410 | 2.47 | 0.00265  | 0.00658  |
| chr8  | YWHAZ      | 100952279 | 100952638 | 2.47 | 0.00126  | 0.00387  |
| chr8  | INTS10     | 19816789  | 19817118  | 2.47 | 0.00162  | 0.00461  |
| chr1  | TMEM54     | 32901645  | 32901908  | 2.46 | 0.00367  | 0.00833  |
| chr10 | PWWP2B     | 132395627 | 132396037 | 2.46 | 0.000957 | 0.0032   |
| chr12 | ATP2A2     | 110280375 | 110281006 | 2.46 | 1.49E-05 | 0.00024  |
| chr14 | DPF3       | 72893886  | 72894095  | 2.46 | 0.00121  | 0.00376  |
| chr15 | RORA       | 60591997  | 60592187  | 2.46 | 0.00103  | 0.00337  |
| chr17 | PAFAH1B1   | 2593101   | 2593446   | 2.46 | 0.000345 | 0.00159  |
| chr17 | CDC42EP4   | 73308194  | 73308497  | 2.46 | 0.00114  | 0.00362  |
| chr2  | PASK       | 241149616 | 241150293 | 2.46 | 0.000121 | 0.000819 |
| chr21 | ADARB1     | 45075155  | 45075465  | 2.46 | 0.000525 | 0.00209  |
| chr3  | CRTAP      | 33113580  | 33114012  | 2.46 | 3.55E-05 | 0.000392 |
| chr7  | CUX1       | 101814972 | 101815612 | 2.46 | 5.08E-06 | 0.000128 |
| chr7  | FAM185A    | 102748953 | 102749781 | 2.46 | 0.000449 | 0.00189  |
| chr8  | EXTL3      | 28701836  | 28702505  | 2.46 | 1.01E-07 | 1.64E-05 |
| chr1  | LINC01135  | 58784398  | 58785203  | 2.45 | 4.67E-07 | 3.66E-05 |
| chr10 | DENND10    | 119104146 | 119104335 | 2.45 | 0.00188  | 0.00513  |
| chr18 | TTC39C-AS1 | 24014997  | 24015502  | 2.45 | 7.70E-05 | 0.000624 |
| chr19 | ZNF77      | 2944418   | 2944933   | 2.45 | 4.12E-06 | 0.000114 |
| chr19 | ZNF780B    | 40055495  | 40056455  | 2.45 | 1.75E-06 | 7.67E-05 |
| chr19 | IRF2BP1    | 45885049  | 45885841  | 2.45 | 4.94E-05 | 0.000475 |
| chr19 | CDC34      | 530852    | 531553    | 2.45 | 3.19E-05 | 0.000373 |
| chr2  | CDPF1P1    | 55223509  | 55223791  | 2.45 | 0.00329  | 0.0077   |
| chr22 | PPM1F      | 21952635  | 21952829  | 2.45 | 0.000885 | 0.00302  |
| chr22 | CCDC134    | 41800094  | 41800535  | 2.45 | 0.000266 | 0.00135  |
| chr4  | NR3C2      | 148442724 | 148443182 | 2.45 | 2.44E-05 | 0.000318 |
| chr5  | APC        | 112737532 | 112737740 | 2.45 | 0.00382  | 0.00858  |
| chr5  | RASGRF2    | 80960646  | 80961202  | 2.45 | 0.0019   | 0.00515  |

|       |              |           |           |      |          |          |
|-------|--------------|-----------|-----------|------|----------|----------|
| chr7  | SUN1         | 812822    | 813198    | 2.45 | 0.0049   | 0.0104   |
| chr8  | PLEC         | 143940728 | 143941667 | 2.45 | 4.86E-05 | 0.00047  |
| chr9  | DUX4L50      | 63817847  | 63818283  | 2.45 | 0.00913  | 0.0168   |
| chr1  | CKS1B        | 154975014 | 154975221 | 2.44 | 0.000645 | 0.00242  |
| chr1  | MTMR9LP      | 32240363  | 32241871  | 2.44 | 3.62E-09 | 4.24E-06 |
| chr18 | CCBE1        | 59696237  | 59696632  | 2.44 | 0.000192 | 0.00109  |
| chr3  | CHST2        | 143119089 | 143119432 | 2.44 | 0.000345 | 0.00159  |
| chr3  | LOC107986031 | 196317219 | 196318221 | 2.44 | 1.99E-05 | 0.00028  |
| chr6  | RREB1        | 7107770   | 7107935   | 2.44 | 0.00519  | 0.0108   |
| chr1  | EGLN1        | 231421674 | 231422131 | 2.43 | 0.000542 | 0.00214  |
| chr11 | WEE1         | 9572895   | 9573417   | 2.43 | 0.000127 | 0.000842 |
| chr13 | MPHOSPH8     | 19633186  | 19633513  | 2.43 | 0.000614 | 0.00234  |
| chr15 | CRTC3        | 90529310  | 90529811  | 2.43 | 0.000683 | 0.0025   |
| chr17 | MYBBP1A      | 4555520   | 4555866   | 2.43 | 0.00021  | 0.00116  |
| chr2  | LBH          | 30231545  | 30231744  | 2.43 | 0.00427  | 0.00933  |
| chr1  | SLC22A15     | 115975992 | 115976402 | 2.42 | 0.000315 | 0.0015   |
| chr11 | LTBP3        | 65558505  | 65559098  | 2.42 | 0.000642 | 0.00241  |
| chr12 | CPNE8        | 38906482  | 38906726  | 2.42 | 0.00604  | 0.0122   |
| chr13 | ATP7B        | 52011058  | 52012167  | 2.42 | 4.75E-07 | 3.68E-05 |
| chr15 | DUT          | 48331133  | 48331559  | 2.42 | 6.17E-06 | 0.000142 |
| chr16 | ITPRIPL2     | 19114305  | 19114942  | 2.42 | 1.88E-05 | 0.000273 |
| chr16 | FBXL19       | 30923855  | 30924230  | 2.42 | 3.07E-05 | 0.000366 |
| chr16 | TFAP4        | 4271685   | 4271868   | 2.42 | 0.00678  | 0.0133   |
| chr17 | EIF1         | 41688937  | 41689293  | 2.42 | 0.000274 | 0.00137  |
| chr18 | CNDP2        | 74495662  | 74496041  | 2.42 | 0.000635 | 0.00239  |
| chr2  | SPRED2       | 65431475  | 65432178  | 2.42 | 2.19E-07 | 2.45E-05 |
| chr3  | KLHL24       | 183635674 | 183636528 | 2.42 | 7.01E-07 | 4.59E-05 |
| chr3  | IGF2BP2      | 185825596 | 185826577 | 2.42 | 3.54E-06 | 0.000108 |
| chr5  | LARP1        | 154755363 | 154755880 | 2.42 | 4.17E-06 | 0.000115 |
| chr7  | RSBN1L       | 77696495  | 77697047  | 2.42 | 3.26E-06 | 0.000105 |
| chr8  | ERI1         | 8891822   | 8893076   | 2.42 | 2.61E-07 | 2.73E-05 |

|       |              |           |           |      |          |          |
|-------|--------------|-----------|-----------|------|----------|----------|
| chr11 | KDM2A        | 67119302  | 67119544  | 2.41 | 0.000121 | 0.000818 |
| chr11 | FAM86C1P     | 71787569  | 71788225  | 2.41 | 0.000263 | 0.00134  |
| chr11 | CHID1        | 911132    | 911724    | 2.41 | 0.000649 | 0.00243  |
| chr12 | CPNE8        | 38905228  | 38905591  | 2.41 | 0.00158  | 0.00454  |
| chr13 | GAS6         | 113862829 | 113863273 | 2.41 | 0.000488 | 0.002    |
| chr14 | ACOT1        | 73537157  | 73537704  | 2.41 | 0.000547 | 0.00215  |
| chr14 | CALM1        | 90397105  | 90397579  | 2.41 | 2.17E-05 | 0.000296 |
| chr2  | ITGA6        | 172428235 | 172428517 | 2.41 | 0.0019   | 0.00515  |
| chr20 | ZNF341       | 33732502  | 33732754  | 2.41 | 0.00203  | 0.00541  |
| chr20 | CSE1L        | 49046365  | 49046696  | 2.41 | 0.000126 | 0.000838 |
| chr3  | SCHIP1       | 159762899 | 159763564 | 2.41 | 0.000122 | 0.000824 |
| chr6  | HIVEP2       | 142945252 | 142946258 | 2.41 | 3.89E-07 | 3.39E-05 |
| chr8  | TRY-GTA5-2   | 66113581  | 66113933  | 2.41 | 4.84E-05 | 0.000468 |
| chr9  | ANKRD18B     | 33524368  | 33524814  | 2.41 | 0.000341 | 0.00158  |
| chr9  | IARS1        | 92293920  | 92294111  | 2.41 | 0.00115  | 0.00364  |
| chrX  | TIMM17B      | 48897315  | 48897707  | 2.41 | 0.00503  | 0.0105   |
| chr1  | AHCTF1       | 246931632 | 246931863 | 2.4  | 0.000565 | 0.0022   |
| chr11 | FADS1        | 61817118  | 61817460  | 2.4  | 0.000529 | 0.0021   |
| chr12 | KITLG        | 88580601  | 88580848  | 2.4  | 0.00252  | 0.00635  |
| chr16 | MIR193BHG    | 14302573  | 14303226  | 2.4  | 7.39E-05 | 0.000608 |
| chr16 | CHD9         | 53129954  | 53130325  | 2.4  | 0.000901 | 0.00306  |
| chr17 | LGALS3BP     | 78978071  | 78978533  | 2.4  | 0.000478 | 0.00197  |
| chr19 | ZNF83        | 52638581  | 52638954  | 2.4  | 0.000846 | 0.00291  |
| chr2  | IMP4         | 130342936 | 130343718 | 2.4  | 3.31E-07 | 3.11E-05 |
| chr2  | MSH6         | 47783187  | 47783742  | 2.4  | 0.000471 | 0.00195  |
| chr4  | SETD7        | 139556020 | 139557353 | 2.4  | 2.49E-08 | 7.98E-06 |
| chr4  | ZNF827       | 145937193 | 145937457 | 2.4  | 0.000326 | 0.00153  |
| chr4  | SEL1L3       | 25861720  | 25862637  | 2.4  | 7.87E-06 | 0.000165 |
| chr6  | HMGA1        | 34236910  | 34237185  | 2.4  | 0.00589  | 0.0119   |
| chr6  | SMIM29       | 34249291  | 34249574  | 2.4  | 0.00184  | 0.00505  |
| chr7  | LOC107986767 | 10940589  | 10940926  | 2.4  | 0.00052  | 0.00208  |

|       |           |           |           |      |          |          |
|-------|-----------|-----------|-----------|------|----------|----------|
| chr1  | NIBAN1    | 184974225 | 184974702 | 2.39 | 8.25E-05 | 0.00065  |
| chr11 | STX3      | 59755550  | 59756240  | 2.39 | 8.10E-05 | 0.000643 |
| chr13 | ING1      | 110714081 | 110715228 | 2.39 | 3.13E-07 | 3.00E-05 |
| chr16 | MIR3178   | 2532381   | 2532895   | 2.39 | 5.02E-05 | 0.00048  |
| chr17 | SREBF1    | 17836393  | 17837466  | 2.39 | 2.90E-08 | 8.21E-06 |
| chr17 | HELZ      | 67245412  | 67245953  | 2.39 | 0.000101 | 0.000727 |
| chr18 | ZNF521    | 25351956  | 25352169  | 2.39 | 0.0018   | 0.00497  |
| chr19 | PCSK4     | 1490003   | 1490345   | 2.39 | 0.00114  | 0.00361  |
| chr2  | PXDN      | 1743207   | 1743546   | 2.39 | 0.00463  | 0.00992  |
| chr20 | PYGB      | 25247067  | 25247946  | 2.39 | 6.82E-06 | 0.00015  |
| chr22 | PLXNB2    | 50306124  | 50307357  | 2.39 | 7.86E-09 | 5.14E-06 |
| chr5  | LARP1     | 154756055 | 154756942 | 2.39 | 1.32E-05 | 0.000222 |
| chr6  | DNPH1     | 43229249  | 43229420  | 2.39 | 0.0136   | 0.0232   |
| chr8  | PHYHIP    | 22231762  | 22232085  | 2.39 | 0.0015   | 0.00438  |
| chr9  | PTCH1     | 95506257  | 95506590  | 2.39 | 0.000865 | 0.00296  |
| chr1  | KIF26B    | 245155595 | 245156534 | 2.38 | 2.11E-06 | 8.21E-05 |
| chr1  | SCMH1     | 41241247  | 41241588  | 2.38 | 0.0012   | 0.00374  |
| chr13 | INTS6     | 51452429  | 51453010  | 2.38 | 1.36E-05 | 0.000226 |
| chr18 | KCTD1     | 26549410  | 26550099  | 2.38 | 6.92E-05 | 0.000585 |
| chr19 | ATP13A1   | 19663768  | 19664039  | 2.38 | 0.00201  | 0.00537  |
| chr20 | ZNF341    | 33731734  | 33731961  | 2.38 | 0.00517  | 0.0108   |
| chr3  | PPM1L     | 160755652 | 160756262 | 2.38 | 0.000131 | 0.000858 |
| chr3  | IGF2BP2   | 185823893 | 185825038 | 2.38 | 5.29E-08 | 1.13E-05 |
| chr9  | AJM1      | 136842489 | 136843516 | 2.38 | 0.000156 | 0.000961 |
| chr12 | HIP1R     | 122834714 | 122835063 | 2.37 | 0.000471 | 0.00195  |
| chr14 | TEX22     | 105398325 | 105399691 | 2.37 | 9.32E-07 | 5.29E-05 |
| chr14 | MAPK1IP1L | 55051688  | 55052024  | 2.37 | 0.000994 | 0.00328  |
| chr14 | GALC      | 87992469  | 87992842  | 2.37 | 0.00225  | 0.00584  |
| chr16 | PKMYT1    | 2980643   | 2980989   | 2.37 | 0.000136 | 0.000883 |
| chr17 | TP53I13   | 29567199  | 29567379  | 2.37 | 0.00458  | 0.00983  |
| chr4  | GAB1      | 143335623 | 143336617 | 2.37 | 6.23E-06 | 0.000142 |



|       |            |           |           |      |          |          |
|-------|------------|-----------|-----------|------|----------|----------|
| chr5  | AFF4       | 132963720 | 132964156 | 2.37 | 0.00018  | 0.00105  |
| chr9  | CDKN2A     | 21995058  | 21996082  | 2.37 | 1.97E-05 | 0.000279 |
| chr10 | ZNF33A     | 38011126  | 38011484  | 2.36 | 0.000722 | 0.0026   |
| chr12 | NR4A1      | 52037377  | 52037905  | 2.36 | 1.64E-05 | 0.000253 |
| chr14 | RPS6KL1    | 74922621  | 74923237  | 2.36 | 0.000645 | 0.00242  |
| chr16 | PDPR2P     | 74368383  | 74369363  | 2.36 | 0.000426 | 0.00182  |
| chr16 | TMEM231    | 75555355  | 75556199  | 2.36 | 1.00E-05 | 0.000191 |
| chr17 | LINC02875  | 61412609  | 61413152  | 2.36 | 0.000342 | 0.00158  |
| chr2  | UBXN2A     | 23940010  | 23940348  | 2.36 | 0.000328 | 0.00154  |
| chr22 | CYB5R3     | 42649515  | 42650008  | 2.36 | 0.000295 | 0.00143  |
| chr3  | PIGZ       | 196968064 | 196968624 | 2.36 | 0.000522 | 0.00209  |
| chr4  | SETD7      | 139555329 | 139555832 | 2.36 | 0.000101 | 0.000728 |
| chr5  | MAP3K1     | 56816036  | 56817150  | 2.36 | 0.0327   | 0.0476   |
| chr8  | NRG1       | 32547552  | 32547904  | 2.36 | 0.000879 | 0.003    |
| chrX  | MAMLD1     | 150363561 | 150364828 | 2.36 | 2.22E-05 | 3.00E-04 |
| chr12 | CACNB3     | 48818093  | 48819233  | 2.35 | 4.16E-06 | 0.000115 |
| chr15 | LOC145783  | 56917889  | 56918883  | 2.35 | 0.000101 | 0.000726 |
| chr16 | SETD6      | 58515537  | 58516073  | 2.35 | 0.000883 | 0.00301  |
| chr17 | CDC42EP4   | 73310854  | 73311975  | 2.35 | 6.85E-07 | 4.57E-05 |
| chr2  | ARL6IP6    | 152717688 | 152718488 | 2.35 | 5.02E-05 | 0.00048  |
| chr6  | TRQ-CTG1-2 | 27519079  | 27519418  | 2.35 | 0.00154  | 0.00446  |
| chr9  | ABL1       | 130834474 | 130835163 | 2.35 | 1.69E-06 | 7.58E-05 |
| chr1  | CAP1       | 40039757  | 40040452  | 2.34 | 6.99E-05 | 0.000587 |
| chr10 | DIP2C      | 688726    | 689281    | 2.34 | 1.84E-05 | 0.00027  |
| chr11 | TRV-TAC1-1 | 59550052  | 59550385  | 2.34 | 0.0067   | 0.0132   |
| chr11 | AIP        | 67464818  | 67465289  | 2.34 | 0.0011   | 0.00352  |
| chr14 | NIN        | 50830157  | 50830519  | 2.34 | 0.000888 | 0.00303  |
| chr17 | TAOK1      | 29390357  | 29390587  | 2.34 | 0.000311 | 0.00149  |
| chr18 | DYM        | 49459900  | 49460681  | 2.34 | 2.00E-07 | 2.36E-05 |
| chr19 | ZNF302     | 34677739  | 34678394  | 2.34 | 6.26E-05 | 0.000551 |
| chr2  | ROCK2      | 11345099  | 11345463  | 2.34 | 0.00103  | 0.00335  |

|       |              |           |           |      |          |          |
|-------|--------------|-----------|-----------|------|----------|----------|
| chr22 | SFI1         | 31495982  | 31496392  | 2.34 | 0.000359 | 0.00163  |
| chr4  | NELFA        | 2007983   | 2009861   | 2.34 | 2.78E-08 | 8.21E-06 |
| chr7  | SNX8         | 2304972   | 2305296   | 2.34 | 0.0021   | 0.00556  |
| chr8  | ZNF703       | 37697752  | 37698409  | 2.34 | 0.00104  | 0.00337  |
| chr1  | CEP104       | 3856990   | 3858282   | 2.33 | 7.08E-08 | 1.35E-05 |
| chr11 | B4GAT1       | 66346770  | 66347608  | 2.33 | 1.23E-05 | 0.000213 |
| chr19 | ZNF134       | 57614264  | 57614962  | 2.33 | 2.67E-06 | 9.44E-05 |
| chr2  | HJURP        | 233853831 | 233854518 | 2.33 | 4.77E-05 | 0.000465 |
| chr2  | CNNM4        | 96761095  | 96761607  | 2.33 | 0.000124 | 0.000829 |
| chr8  | PTK2         | 141000101 | 141001019 | 2.33 | 2.05E-07 | 2.41E-05 |
| chrX  | USP27X-DT    | 49878320  | 49878971  | 2.33 | 0.000188 | 0.00107  |
| chr1  | PSRC1        | 109283328 | 109284035 | 2.32 | 0.000167 | 0.000997 |
| chr1  | EPHA2        | 16154849  | 16156082  | 2.32 | 1.29E-06 | 6.45E-05 |
| chr1  | LEPR         | 65525527  | 65526112  | 2.32 | 0.000649 | 0.00243  |
| chr10 | ARHGAP22     | 48655549  | 48656106  | 2.32 | 0.000424 | 0.00182  |
| chr11 | C11orf80     | 66744787  | 66745142  | 2.32 | 0.000397 | 0.00174  |
| chr12 | ZNF140       | 133080903 | 133081280 | 2.32 | 0.000176 | 0.00104  |
| chr12 | PTHLH        | 27969758  | 27970286  | 2.32 | 0.00282  | 0.00688  |
| chr16 | C16orf46     | 81076807  | 81077845  | 2.32 | 5.03E-06 | 0.000127 |
| chr17 | DGKE         | 56834315  | 56834787  | 2.32 | 0.00141  | 0.00419  |
| chr17 | PHF23        | 7238703   | 7239539   | 2.32 | 1.46E-07 | 1.93E-05 |
| chr19 | ODF3L2       | 489258    | 489976    | 2.32 | 0.000105 | 0.000744 |
| chr2  | AGBL5-AS1    | 27049755  | 27050703  | 2.32 | 1.31E-05 | 0.000221 |
| chr20 | LOC101926935 | 25854159  | 25854450  | 2.32 | 0.00341  | 0.0079   |
| chr22 | JOSD1        | 38701296  | 38701770  | 2.32 | 0.000921 | 0.00311  |
| chr3  | TEX264       | 51671252  | 51672663  | 2.32 | 2.79E-07 | 2.83E-05 |
| chr4  | SPRY1        | 123397899 | 123398236 | 2.32 | 0.000365 | 0.00165  |
| chr4  | MAPK10       | 86594323  | 86594646  | 2.32 | 0.000853 | 0.00293  |
| chr5  | SEPTIN8      | 132777450 | 132778126 | 2.32 | 2.17E-05 | 0.000296 |
| chr5  | MIR4638      | 181222550 | 181222845 | 2.32 | 0.00114  | 0.00361  |
| chr6  | PHIP         | 79077925  | 79078244  | 2.32 | 0.000683 | 0.0025   |

|       |              |           |           |      |          |          |
|-------|--------------|-----------|-----------|------|----------|----------|
| chr7  | SNHG26       | 22854349  | 22854992  | 2.32 | 8.25E-05 | 0.00065  |
| chr8  | KLF10        | 102654548 | 102655712 | 2.32 | 1.56E-08 | 7.12E-06 |
| chr9  | HDHD3        | 113376462 | 113376935 | 2.32 | 0.000115 | 0.00079  |
| chr9  | CEMIP2       | 71769088  | 71769663  | 2.32 | 0.000232 | 0.00124  |
| chr1  | DENND2C      | 114670245 | 114670535 | 2.31 | 0.00186  | 0.00508  |
| chr1  | CDK11B       | 1658064   | 1658962   | 2.31 | 0.0191   | 0.0306   |
| chr11 | PTP4A2P2     | 134124870 | 134125302 | 2.31 | 0.00148  | 0.00433  |
| chr12 | LOC105369666 | 13101404  | 13101880  | 2.31 | 0.00303  | 0.00724  |
| chr15 | LOXL1        | 73925826  | 73927669  | 2.31 | 1.79E-06 | 7.70E-05 |
| chr18 | ZNF521       | 25350006  | 25350971  | 2.31 | 2.99E-06 | 0.000101 |
| chr18 | SETBP1-DT    | 44679197  | 44679542  | 2.31 | 0.00138  | 0.00412  |
| chr2  | FAHD2B       | 97094977  | 97095459  | 2.31 | 0.00349  | 0.00805  |
| chr4  | RUFY3        | 70703757  | 70704125  | 2.31 | 0.00224  | 0.00582  |
| chr9  | CNTRL        | 121074999 | 121075688 | 2.31 | 2.58E-06 | 9.24E-05 |
| chr10 | LIPJ         | 88582817  | 88583541  | 2.3  | 3.25E-05 | 0.000376 |
| chr11 | PRR5L        | 36376411  | 36377880  | 2.3  | 3.71E-05 | 0.000401 |
| chr11 | FADS2        | 61815432  | 61816730  | 2.3  | 1.79E-07 | 2.20E-05 |
| chr14 | AK7          | 96391262  | 96391527  | 2.3  | 0.00248  | 0.00627  |
| chr16 | PKD1P6       | 15152194  | 15154287  | 2.3  | 0.00749  | 0.0144   |
| chr17 | LOC105371836 | 56960824  | 56960998  | 2.3  | 0.00277  | 0.00679  |
| chr17 | KDM6B        | 7841912   | 7844847   | 2.3  | 0.00718  | 0.0139   |
| chr19 | RFX1         | 14006832  | 14007452  | 2.3  | 1.02E-05 | 0.000193 |
| chr2  | ZNF514       | 95158566  | 95159540  | 2.3  | 1.81E-06 | 7.73E-05 |
| chr3  | LINC02618    | 141659782 | 141660220 | 2.3  | 0.00113  | 0.00358  |
| chr5  | ARHGAP26     | 142770802 | 142771647 | 2.3  | 2.16E-06 | 8.37E-05 |
| chr7  | CDCA7L       | 21945492  | 21946107  | 2.3  | 0.00107  | 0.00345  |
| chr7  | GLCC1        | 7968816   | 7969191   | 2.3  | 0.00286  | 0.00693  |
| chr9  | ARPC5L       | 124862138 | 124862832 | 2.3  | 3.63E-05 | 0.000397 |
| chr1  | OSCP1        | 36450010  | 36450428  | 2.29 | 3.31E-05 | 0.000378 |
| chr10 | BMS1P2       | 47553083  | 47554054  | 2.29 | 0.000113 | 0.000786 |
| chr11 | TM7SF2       | 65111868  | 65113418  | 2.29 | 1.77E-08 | 7.48E-06 |

|       |              |           |           |      |          |          |
|-------|--------------|-----------|-----------|------|----------|----------|
| chr11 | CTSC         | 88337234  | 88337730  | 2.29 | 1.31E-05 | 0.000221 |
| chr12 | NFYB         | 104138424 | 104138898 | 2.29 | 0.00211  | 0.00558  |
| chr14 | CBLN3        | 24429192  | 24429839  | 2.29 | 0.000215 | 0.00118  |
| chr16 | CHMP1A       | 89657182  | 89657676  | 2.29 | 0.000481 | 0.00198  |
| chr17 | SLC25A35     | 8295544   | 8295887   | 2.29 | 0.00315  | 0.00745  |
| chr19 | DIRAS1       | 2720111   | 2720981   | 2.29 | 1.42E-05 | 0.000232 |
| chr19 | TRAPPC6A     | 45178795  | 45179448  | 2.29 | 2.56E-05 | 0.000327 |
| chr22 | CDPF1        | 46249752  | 46250271  | 2.29 | 4.27E-05 | 0.000434 |
| chr4  | FRYL         | 48779926  | 48780220  | 2.29 | 0.000621 | 0.00235  |
| chr5  | CDKN2AIPNL   | 134412026 | 134412400 | 2.29 | 0.000322 | 0.00152  |
| chr6  | UST          | 148747277 | 148748901 | 2.29 | 9.05E-11 | 8.28E-07 |
| chr6  | NUP153       | 17705949  | 17706892  | 2.29 | 8.89E-08 | 1.49E-05 |
| chrX  | LOC105373311 | 109732513 | 109733218 | 2.29 | 7.47E-06 | 0.000159 |
| chrX  | LINC00632    | 140764462 | 140764916 | 2.29 | 0.000191 | 0.00109  |
| chrX  | ZMYM3        | 71253933  | 71254138  | 2.29 | 0.00188  | 0.00512  |
| chr1  | SLC25A24     | 108200437 | 108200916 | 2.28 | 0.00309  | 0.00735  |
| chr1  | CCDC24       | 43990933  | 43992445  | 2.28 | 1.82E-05 | 0.000268 |
| chr10 | FAM107B      | 14604632  | 14604812  | 2.28 | 0.00452  | 0.00973  |
| chr17 | TMEM220      | 10729526  | 10730083  | 2.28 | 0.000478 | 0.00197  |
| chr18 | MBP          | 77131924  | 77132674  | 2.28 | 3.29E-06 | 0.000105 |
| chr19 | LIN7B        | 49114603  | 49115329  | 2.28 | 5.74E-06 | 0.000137 |
| chr2  | METTL21A     | 207625584 | 207626000 | 2.28 | 0.00061  | 0.00233  |
| chr2  | SNED1        | 240999382 | 240999812 | 2.28 | 0.00139  | 0.00414  |
| chr2  | C2orf81      | 74421212  | 74421579  | 2.28 | 0.00416  | 0.00915  |
| chr22 | ZNF74        | 20394171  | 20394726  | 2.28 | 0.000171 | 0.00101  |
| chr22 | H1-0         | 37802471  | 37803038  | 2.28 | 0.000106 | 0.000749 |
| chr4  | LCORL        | 18021256  | 18021682  | 2.28 | 0.000582 | 0.00225  |
| chr6  | CCDC170      | 151493831 | 151494490 | 2.28 | 0.00349  | 0.00805  |
| chr9  | BNC2         | 16871765  | 16871960  | 2.28 | 0.00266  | 0.00659  |
| chr1  | RNVU1-21     | 148334609 | 148335233 | 2.27 | 0.000197 | 0.00111  |
| chr1  | OSCP1        | 36450599  | 36451057  | 2.27 | 0.00199  | 0.00534  |

|       |              |           |           |      |          |          |
|-------|--------------|-----------|-----------|------|----------|----------|
| chr17 | SPHK1        | 76382602  | 76383230  | 2.27 | 7.66E-05 | 0.000622 |
| chr19 | DYRK1B       | 39833791  | 39834125  | 2.27 | 0.00475  | 0.0101   |
| chr19 | EML2-AS1     | 45641611  | 45642150  | 2.27 | 0.000292 | 0.00143  |
| chr2  | FKBP1B       | 24049898  | 24050644  | 2.27 | 1.09E-05 | 0.000201 |
| chr2  | ANKMY1       | 240557174 | 240557650 | 2.27 | 0.000609 | 0.00232  |
| chr2  | FANCL        | 58240947  | 58241312  | 2.27 | 0.00216  | 0.00566  |
| chr22 | PITPNB       | 27918357  | 27918892  | 2.27 | 2.10E-05 | 0.000291 |
| chr3  | ABHD6        | 58237580  | 58238875  | 2.27 | 4.03E-06 | 0.000114 |
| chr3  | EIF4E3       | 71724481  | 71724985  | 2.27 | 0.000291 | 0.00142  |
| chr6  | MDGA1        | 37698432  | 37699047  | 2.27 | 0.000666 | 0.00247  |
| chr7  | HBP1         | 107169032 | 107169708 | 2.27 | 3.20E-05 | 0.000374 |
| chr7  | GATAD1       | 92447482  | 92447849  | 2.27 | 0.000218 | 0.00119  |
| chr8  | SOX17        | 54458324  | 54459130  | 2.27 | 1.43E-05 | 0.000233 |
| chrX  | PNPLA4       | 7926922   | 7927353   | 2.27 | 0.00116  | 0.00366  |
| chr1  | COP1         | 176206880 | 176207142 | 2.26 | 0.00119  | 0.00372  |
| chr1  | RRAGC        | 38858704  | 38859675  | 2.26 | 2.70E-06 | 9.50E-05 |
| chr10 | LOC101929846 | 63629756  | 63630212  | 2.26 | 0.000421 | 0.00181  |
| chr12 | TUBA1C       | 49264368  | 49264760  | 2.26 | 0.00171  | 0.00478  |
| chr13 | CRYL1        | 20525083  | 20525620  | 2.26 | 0.000681 | 0.0025   |
| chr16 | MAPK8IP3     | 1706271   | 1706629   | 2.26 | 0.000524 | 0.00209  |
| chr16 | ADCY9        | 4115119   | 4115508   | 2.26 | 0.00277  | 0.00679  |
| chr17 | LRR37A3      | 64919615  | 64920026  | 2.26 | 0.0271   | 0.0408   |
| chr17 | COG1         | 73192232  | 73192802  | 2.26 | 0.000975 | 0.00323  |
| chr2  | HPCAL1       | 10303178  | 10304000  | 2.26 | 3.16E-05 | 0.000372 |
| chr2  | EPHA4        | 221570911 | 221571184 | 2.26 | 0.00445  | 0.00962  |
| chr2  | NDUFA10      | 240025426 | 240025926 | 2.26 | 0.000388 | 0.00172  |
| chr22 | IL17RA       | 17085166  | 17086111  | 2.26 | 3.41E-05 | 0.000384 |
| chr3  | DVL3         | 184154926 | 184155220 | 2.26 | 0.00189  | 0.00514  |
| chr7  | KIAA1549     | 138980423 | 138981122 | 2.26 | 0.000237 | 0.00125  |
| chr9  | NINJ1        | 93132414  | 93134955  | 2.26 | 9.30E-09 | 5.16E-06 |
| chr1  | NOTCH2NLR    | 120723978 | 120726702 | 2.25 | 2.81E-05 | 0.000347 |

|       |                |           |           |      |          |          |
|-------|----------------|-----------|-----------|------|----------|----------|
| chr10 | HHEX           | 92689076  | 92689425  | 2.25 | 0.00253  | 0.00637  |
| chr12 | SCARB1         | 124862418 | 124863889 | 2.25 | 2.23E-08 | 7.84E-06 |
| chr12 | PTHLH          | 27968993  | 27969614  | 2.25 | 2.84E-05 | 0.000348 |
| chr15 | HACD3          | 65530515  | 65531174  | 2.25 | 0.000149 | 0.000934 |
| chr16 | FANCA          | 89816801  | 89817386  | 2.25 | 0.00412  | 0.0091   |
| chr19 | DHPS           | 12680973  | 12681834  | 2.25 | 0.00102  | 0.00334  |
| chr19 | CALR           | 12937682  | 12938203  | 2.25 | 0.000315 | 0.0015   |
| chr19 | ZNF792         | 34963036  | 34964325  | 2.25 | 2.66E-06 | 9.44E-05 |
| chr2  | MARCHF4        | 216370997 | 216371666 | 2.25 | 0.000236 | 0.00125  |
| chr3  | WNT5A          | 55485376  | 55485677  | 2.25 | 0.00201  | 0.00538  |
| chr4  | SLC4A4         | 71186728  | 71187120  | 2.25 | 0.000555 | 0.00217  |
| chr5  | EGR1           | 138464305 | 138464943 | 2.25 | 6.45E-05 | 0.000561 |
| chr6  | VEGFA          | 43770196  | 43771852  | 2.25 | 2.63E-07 | 2.74E-05 |
| chr9  | KDM4C          | 6758096   | 6759222   | 2.25 | 3.67E-06 | 0.00011  |
| chrX  | HTATSF1        | 136497699 | 136498059 | 2.25 | 0.00262  | 0.00653  |
| chr1  | RCOR3          | 211260174 | 211261154 | 2.24 | 2.01E-06 | 7.96E-05 |
| chr1  | GPR3           | 27392791  | 27393174  | 2.24 | 0.000132 | 0.000861 |
| chr11 | PARVA          | 12377103  | 12377446  | 2.24 | 0.00203  | 0.00541  |
| chr16 | CCDC102A       | 57536660  | 57537129  | 2.24 | 0.00273  | 0.00672  |
| chr17 | FGF11          | 7440282   | 7440777   | 2.24 | 0.000401 | 0.00175  |
| chr17 | CSNK1D         | 82273203  | 82274447  | 2.24 | 6.51E-06 | 0.000147 |
| chr18 | CTIF           | 48539159  | 48540241  | 2.24 | 7.40E-08 | 1.35E-05 |
| chr19 | FAM98C         | 38403198  | 38403873  | 2.24 | 0.000314 | 0.0015   |
| chr2  | KHK            | 27085367  | 27086543  | 2.24 | 6.55E-05 | 0.000565 |
| chr4  | METAP1         | 98995765  | 98996070  | 2.24 | 0.00326  | 0.00765  |
| chr5  | TRIO           | 14144063  | 14144695  | 2.24 | 1.35E-05 | 0.000226 |
| chr9  | TJP2           | 69174227  | 69174840  | 2.24 | 0.000162 | 0.000981 |
| chrX  | ARMCX5-GPRASP2 | 102659525 | 102659857 | 2.24 | 0.00152  | 0.0044   |
| chr10 | SFXN2          | 102714654 | 102715105 | 2.23 | 0.00246  | 0.00624  |
| chr10 | CHST3          | 71963437  | 71964413  | 2.23 | 1.51E-05 | 0.00024  |
| chr11 | LOC101928053   | 10809162  | 10809674  | 2.23 | 0.00045  | 0.00189  |

|       |              |           |           |      |          |          |
|-------|--------------|-----------|-----------|------|----------|----------|
| chr12 | PRICKLE1     | 42482462  | 42483954  | 2.23 | 2.04E-05 | 0.000285 |
| chr12 | MSRB3        | 65278501  | 65279323  | 2.23 | 2.80E-06 | 9.70E-05 |
| chr14 | KLC1         | 103629249 | 103630221 | 2.23 | 2.47E-06 | 8.98E-05 |
| chr14 | LOC105370461 | 39432717  | 39433165  | 2.23 | 0.000433 | 0.00184  |
| chr17 | HS3ST3A1     | 13601021  | 13601883  | 2.23 | 3.85E-05 | 0.00041  |
| chr17 | SGSM2        | 2336606   | 2337421   | 2.23 | 6.90E-05 | 0.000583 |
| chr17 | ANKRD40      | 50707024  | 50707669  | 2.23 | 4.16E-06 | 0.000115 |
| chr17 | TBX2-AS1     | 61398065  | 61399583  | 2.23 | 2.62E-06 | 9.34E-05 |
| chr17 | CYB561       | 63445624  | 63446041  | 2.23 | 3.00E-04 | 0.00145  |
| chr18 | SERPINB8     | 63970116  | 63970496  | 2.23 | 9.99E-05 | 0.000724 |
| chr2  | PFN4         | 24123811  | 24124199  | 2.23 | 0.000972 | 0.00323  |
| chr22 | LOC107985532 | 21652150  | 21653062  | 2.23 | 4.40E-06 | 0.000118 |
| chr22 | HDAC10       | 50247984  | 50248316  | 2.23 | 0.006    | 0.0121   |
| chr3  | STT3B        | 31532646  | 31533305  | 2.23 | 0.000859 | 0.00295  |
| chr6  | FRK          | 116100377 | 116100679 | 2.23 | 0.00216  | 0.00566  |
| chr6  | LRRRC73      | 43510494  | 43511014  | 2.23 | 0.000774 | 0.00273  |
| chr7  | LOC102723758 | 1124264   | 1124494   | 2.23 | 0.0137   | 0.0233   |
| chr7  | CDK13        | 39949811  | 39951074  | 2.23 | 4.61E-07 | 3.66E-05 |
| chrX  | TAB3         | 30888248  | 30889068  | 2.23 | 1.61E-05 | 0.000251 |
| chr1  | FAM72C       | 143972682 | 143976657 | 2.22 | 0.0302   | 0.0447   |
| chr11 | BRSK2        | 1389054   | 1389549   | 2.22 | 0.000704 | 0.00256  |
| chr11 | RPS6KB2      | 67427953  | 67428319  | 2.22 | 0.00176  | 0.00489  |
| chr17 | RAI1         | 17682042  | 17682872  | 2.22 | 8.75E-06 | 0.000175 |
| chr17 | TRR-CCT2-1   | 75034567  | 75035017  | 2.22 | 0.00103  | 0.00336  |
| chr19 | ANKRD24      | 4182718   | 4183042   | 2.22 | 0.000665 | 0.00246  |
| chr2  | GLS          | 190880295 | 190880582 | 2.22 | 0.00154  | 0.00446  |
| chr20 | SLC2A4RG     | 63740513  | 63741691  | 2.22 | 3.57E-05 | 0.000393 |
| chr3  | IQSEC1       | 12993505  | 12993856  | 2.22 | 0.00313  | 0.00742  |
| chr3  | DZIP1L       | 138115236 | 138116427 | 2.22 | 3.31E-06 | 0.000105 |
| chr4  | SMARCA5      | 143513145 | 143513319 | 2.22 | 0.00551  | 0.0113   |
| chr4  | ADD1         | 2842755   | 2843714   | 2.22 | 4.66E-06 | 0.000122 |

|       |              |           |           |      |          |          |
|-------|--------------|-----------|-----------|------|----------|----------|
| chr4  | CRACD        | 56049516  | 56050112  | 2.22 | 0.000276 | 0.00138  |
| chr5  | ERAP1        | 96935294  | 96935863  | 2.22 | 0.000277 | 0.00138  |
| chr9  | PKN3         | 128702276 | 128702708 | 2.22 | 0.00431  | 0.00938  |
| chr9  | PPP1R26      | 135480357 | 135481084 | 2.22 | 5.38E-05 | 0.000501 |
| chrX  | SLC9A6       | 135985027 | 135985372 | 2.22 | 0.00251  | 0.00634  |
| chr1  | LRRC71       | 156920102 | 156920468 | 2.21 | 0.00351  | 0.00807  |
| chr1  | CHML         | 241639857 | 241640103 | 2.21 | 0.0109   | 0.0195   |
| chr1  | LDLRAP1      | 25543877  | 25545136  | 2.21 | 5.71E-07 | 4.12E-05 |
| chr10 | ARHGAP21     | 24722930  | 24723202  | 2.21 | 0.00323  | 0.00759  |
| chr11 | LOC105369422 | 87037328  | 87037674  | 2.21 | 0.00318  | 0.00752  |
| chr12 | LOC105369663 | 12724489  | 12725077  | 2.21 | 0.000129 | 0.000853 |
| chr12 | PAWR         | 79690114  | 79690994  | 2.21 | 3.18E-07 | 3.03E-05 |
| chr12 | SLC6A15      | 84912233  | 84912748  | 2.21 | 0.00465  | 0.00995  |
| chr15 | CRTC3-AS1    | 90716775  | 90717112  | 2.21 | 0.000476 | 0.00196  |
| chr17 | ADORA2B      | 15945263  | 15945709  | 2.21 | 0.00015  | 0.000934 |
| chr17 | PER1         | 8151361   | 8152388   | 2.21 | 3.01E-06 | 0.000101 |
| chr19 | MRI1         | 13764159  | 13764707  | 2.21 | 0.0015   | 0.00437  |
| chr2  | CUL3         | 224584859 | 224585389 | 2.21 | 0.00239  | 0.00611  |
| chr3  | NGLY1        | 25782788  | 25783302  | 2.21 | 3.32E-05 | 0.000379 |
| chr3  | SHISA5       | 48503522  | 48504087  | 2.21 | 0.00149  | 0.00435  |
| chr5  | GFPT2        | 180352637 | 180353352 | 2.21 | 0.000279 | 0.00139  |
| chr7  | PTPN12       | 77536336  | 77536830  | 2.21 | 0.000101 | 0.000728 |
| chr9  | RFX3         | 3526102   | 3527418   | 2.21 | 6.53E-06 | 0.000147 |
| chrX  | ATRX         | 77785847  | 77786163  | 2.21 | 0.00384  | 0.00863  |
| chrX  | RPS6KA6      | 84187497  | 84187880  | 2.21 | 0.000974 | 0.00323  |
| chr1  | KCNC4        | 110210864 | 110211653 | 2.2  | 5.00E-05 | 0.000479 |
| chr1  | SHC1         | 154973926 | 154974389 | 2.2  | 0.000112 | 0.000781 |
| chr1  | SLC6A9       | 44030461  | 44031540  | 2.2  | 1.51E-05 | 0.00024  |
| chr13 | ANKRD10      | 110914681 | 110914991 | 2.2  | 0.0017   | 0.00477  |
| chr13 | TSC22D1      | 44576878  | 44577311  | 2.2  | 0.000514 | 0.00207  |
| chr14 | EFCAB11      | 89954286  | 89954667  | 2.2  | 0.000214 | 0.00118  |



|       |              |           |           |      |          |          |
|-------|--------------|-----------|-----------|------|----------|----------|
| chr15 | TIPIN        | 66386481  | 66386667  | 2.2  | 0.00385  | 0.00865  |
| chr16 | LPCAT2       | 55509677  | 55509899  | 2.2  | 0.00509  | 0.0106   |
| chr17 | FAM171A2     | 44362848  | 44363606  | 2.2  | 6.23E-05 | 0.00055  |
| chr19 | ZNF460-AS1   | 57280010  | 57280334  | 2.2  | 0.000476 | 0.00196  |
| chr2  | GPN1         | 27628262  | 27628867  | 2.2  | 3.74E-05 | 0.000402 |
| chr4  | ING2         | 183505222 | 183506608 | 2.2  | 6.83E-07 | 4.57E-05 |
| chr4  | ADH5         | 99088528  | 99088765  | 2.2  | 0.00222  | 0.00579  |
| chr6  | TRI-AAT5-2   | 27177435  | 27177812  | 2.2  | 0.00067  | 0.00247  |
| chr10 | BBIP1        | 110918715 | 110919132 | 2.19 | 0.000365 | 0.00165  |
| chr11 | C1QTNF5      | 119340320 | 119341076 | 2.19 | 3.83E-05 | 0.000409 |
| chr14 | GPHN         | 66508196  | 66509677  | 2.19 | 4.33E-08 | 1.04E-05 |
| chr16 | RRN3         | 15093076  | 15094216  | 2.19 | 0.0195   | 0.031    |
| chr17 | LOC105371770 | 39573725  | 39574290  | 2.19 | 0.00029  | 0.00142  |
| chr17 | TBKBP1       | 47694128  | 47695632  | 2.19 | 1.02E-06 | 5.56E-05 |
| chr17 | PFN1         | 4947589   | 4948361   | 2.19 | 3.66E-06 | 0.00011  |
| chr17 | LINC01970    | 82292175  | 82292786  | 2.19 | 0.000293 | 0.00143  |
| chr19 | PVR          | 44643919  | 44644891  | 2.19 | 1.91E-06 | 7.89E-05 |
| chr2  | SLC1A4       | 64988277  | 64988817  | 2.19 | 4.46E-05 | 0.000446 |
| chr22 | SNAP29       | 20859092  | 20859428  | 2.19 | 0.00086  | 0.00295  |
| chr3  | RPN1         | 128650451 | 128650799 | 2.19 | 0.00026  | 0.00133  |
| chr4  | NAAA         | 75939939  | 75940831  | 2.19 | 5.48E-05 | 0.000507 |
| chr5  | FBXL17       | 108381511 | 108382239 | 2.19 | 1.41E-05 | 0.000231 |
| chr7  | GET4         | 876677    | 877377    | 2.19 | 2.08E-05 | 0.000289 |
| chr8  | AP3M2        | 42152257  | 42152604  | 2.19 | 0.00808  | 0.0152   |
| chrX  | TCEAL3       | 103607411 | 103607773 | 2.19 | 0.0022   | 0.00574  |
| chr1  | CHD1L        | 147172753 | 147173185 | 2.18 | 0.000349 | 0.0016   |
| chr1  | NBPF9        | 149101954 | 149103975 | 2.18 | 0.00722  | 0.014    |
| chr1  | FMN2         | 240092049 | 240093910 | 2.18 | 2.12E-08 | 7.84E-06 |
| chr1  | MYCL         | 39900667  | 39901648  | 2.18 | 4.15E-05 | 0.000429 |
| chr10 | C10orf95     | 102450892 | 102451674 | 2.18 | 2.39E-05 | 0.000314 |
| chr10 | MEIG1        | 14959392  | 14960714  | 2.18 | 0.000159 | 0.000969 |

|       |           |           |           |      |          |          |
|-------|-----------|-----------|-----------|------|----------|----------|
| chr13 | MRPS31P5  | 52194139  | 52194395  | 2.18 | 0.00232  | 0.00597  |
| chr15 | TLN2      | 62390969  | 62392331  | 2.18 | 1.04E-06 | 5.64E-05 |
| chr16 | BCKDK     | 31108180  | 31109231  | 2.18 | 4.55E-07 | 3.66E-05 |
| chr16 | PDF       | 69330781  | 69331289  | 2.18 | 5.00E-04 | 0.00203  |
| chr16 | WVOX      | 78099724  | 78100153  | 2.18 | 0.00224  | 0.00581  |
| chr17 | SRR       | 2304009   | 2304331   | 2.18 | 0.000593 | 0.00228  |
| chr19 | JUND      | 18280013  | 18280801  | 2.18 | 3.62E-06 | 0.000109 |
| chr2  | UXS1      | 106193163 | 106194187 | 2.18 | 1.12E-05 | 0.000202 |
| chr2  | EML6      | 54723109  | 54723317  | 2.18 | 0.00159  | 0.00455  |
| chr2  | REL-DT    | 60881004  | 60881388  | 2.18 | 0.000589 | 0.00227  |
| chr20 | SNTA1     | 33443952  | 33444313  | 2.18 | 0.00437  | 0.00948  |
| chr21 | CFAP410   | 44339470  | 44339961  | 2.18 | 0.000334 | 0.00156  |
| chr3  | TNK2      | 195894574 | 195895907 | 2.18 | 2.55E-07 | 2.71E-05 |
| chr5  | RICTOR    | 39074556  | 39075205  | 2.18 | 0.000165 | 0.000993 |
| chr6  | CNKS3     | 154509449 | 154510301 | 2.18 | 9.00E-06 | 0.000178 |
| chr7  | FAM220A   | 6348295   | 6348814   | 2.18 | 0.000429 | 0.00183  |
| chr8  | TRAM1     | 70607873  | 70608294  | 2.18 | 0.000454 | 0.0019   |
| chr9  | FAM120AOS | 93450732  | 93451488  | 2.18 | 8.67E-06 | 0.000174 |
| chrX  | TRMT2B    | 101051102 | 101051547 | 2.18 | 0.00115  | 0.00363  |
| chr1  | NTNG1     | 107140272 | 107140614 | 2.17 | 0.00314  | 0.00744  |
| chr1  | IER5      | 181088794 | 181089402 | 2.17 | 0.000302 | 0.00146  |
| chr1  | NEXN      | 77888145  | 77889305  | 2.17 | 1.50E-07 | 1.97E-05 |
| chr11 | DDX6      | 118791290 | 118792172 | 2.17 | 7.89E-07 | 4.81E-05 |
| chr11 | PGAP2     | 3808057   | 3808950   | 2.17 | 2.29E-06 | 8.62E-05 |
| chr11 | INPPL1    | 72223611  | 72224426  | 2.17 | 2.21E-06 | 8.42E-05 |
| chr15 | CDAN1     | 42737265  | 42737587  | 2.17 | 5.15E-05 | 0.000488 |
| chr15 | MYEF2     | 48177727  | 48178089  | 2.17 | 0.000783 | 0.00276  |
| chr17 | MFS11     | 76736783  | 76737311  | 2.17 | 0.000225 | 0.00122  |
| chr19 | DOCK6     | 11261470  | 11262177  | 2.17 | 5.64E-06 | 0.000135 |
| chr2  | TLK1      | 171160333 | 171160691 | 2.17 | 0.0012   | 0.00375  |
| chr3  | RYK       | 134250957 | 134251256 | 2.17 | 0.0125   | 0.0217   |

|       |              |           |           |      |          |          |
|-------|--------------|-----------|-----------|------|----------|----------|
| chr3  | IL17RD       | 57164209  | 57165277  | 2.17 | 5.05E-05 | 0.000482 |
| chr4  | FBXL5        | 15655566  | 15655904  | 2.17 | 0.00243  | 0.00618  |
| chr4  | PDGFC        | 156971989 | 156972402 | 2.17 | 0.000838 | 0.0029   |
| chr4  | UBE2K        | 39697327  | 39697962  | 2.17 | 4.77E-05 | 0.000465 |
| chr4  | KCTD8        | 44448028  | 44448804  | 2.17 | 0.00014  | 0.000901 |
| chr7  | LOC107986862 | 151091331 | 151091652 | 2.17 | 0.00693  | 0.0136   |
| chr8  | ADCK5        | 144374085 | 144374447 | 2.17 | 0.000669 | 0.00247  |
| chr8  | ZNF703       | 37696051  | 37696932  | 2.17 | 1.34E-06 | 6.59E-05 |
| chr8  | ZNF703       | 37697097  | 37697641  | 2.17 | 0.000386 | 0.00171  |
| chr8  | RAD54B       | 94474550  | 94475044  | 2.17 | 0.00181  | 0.00499  |
| chr9  | VAV2         | 133992972 | 133993740 | 2.17 | 0.000114 | 0.000788 |
| chr9  | GCNT1        | 76459222  | 76459835  | 2.17 | 2.49E-05 | 0.000321 |
| chr1  | GNB1         | 1889901   | 1890357   | 2.16 | 7.86E-05 | 0.000631 |
| chr1  | ZC3H12A-DT   | 37471808  | 37472098  | 2.16 | 0.0081   | 0.0153   |
| chr11 | MIR4687      | 3855699   | 3856461   | 2.16 | 3.80E-05 | 0.000406 |
| chr11 | PTDSS2       | 448247    | 448679    | 2.16 | 0.001    | 0.00329  |
| chr13 | ING1         | 110712597 | 110712875 | 2.16 | 0.00423  | 0.00927  |
| chr15 | SIN3A        | 75454801  | 75455785  | 2.16 | 3.28E-06 | 0.000105 |
| chr16 | MEAK7        | 84504912  | 84505466  | 2.16 | 0.000112 | 0.000778 |
| chr17 | ENO3         | 4949198   | 4949502   | 2.16 | 0.0065   | 0.0128   |
| chr17 | PRKCA        | 66302908  | 66303948  | 2.16 | 3.69E-06 | 0.00011  |
| chr17 | SPHK1        | 76383511  | 76384192  | 2.16 | 9.76E-05 | 0.000717 |
| chr19 | ZNF551       | 57682025  | 57682886  | 2.16 | 6.10E-05 | 0.000541 |
| chr2  | EPHA4        | 221572696 | 221573582 | 2.16 | 3.87E-05 | 0.000412 |
| chr2  | RHBDD1       | 226835428 | 226835836 | 2.16 | 0.00167  | 0.00472  |
| chr2  | RAB11FIP5    | 73113110  | 73113542  | 2.16 | 0.00149  | 0.00436  |
| chr22 | ZDHHC8       | 20130999  | 20131556  | 2.16 | 0.000146 | 0.000922 |
| chr4  | MYL5         | 674525    | 675871    | 2.16 | 2.21E-08 | 7.84E-06 |
| chr5  | MAN2A1       | 109689913 | 109691077 | 2.16 | 7.12E-07 | 4.60E-05 |
| chr5  | LOC105379028 | 72107378  | 72108621  | 2.16 | 1.99E-05 | 0.00028  |
| chr5  | FOXD1        | 73447697  | 73447957  | 2.16 | 0.00182  | 0.00501  |

|       |              |           |           |      |          |          |
|-------|--------------|-----------|-----------|------|----------|----------|
| chr6  | MAN1A1       | 119348861 | 119349779 | 2.16 | 2.68E-05 | 0.000337 |
| chr6  | LOC105374907 | 7727887   | 7728405   | 2.16 | 0.00231  | 0.00593  |
| chr7  | LOC100996437 | 66653703  | 66654448  | 2.16 | 7.75E-05 | 0.000626 |
| chrX  | AMMECR1      | 110317221 | 110318032 | 2.16 | 9.06E-05 | 0.000686 |
| chrX  | RBBP7        | 16869389  | 16869671  | 2.16 | 0.000712 | 0.00257  |
| chrX  | NHS          | 17375275  | 17375814  | 2.16 | 0.000519 | 0.00208  |
| chr1  | RPL21P29     | 21906232  | 21906628  | 2.15 | 0.00122  | 0.00378  |
| chr1  | H3-3A        | 226061712 | 226062016 | 2.15 | 0.00283  | 0.00689  |
| chr1  | SERINC2      | 31413308  | 31414293  | 2.15 | 3.52E-06 | 0.000108 |
| chr10 | JCAD         | 30058465  | 30059151  | 2.15 | 9.60E-05 | 0.000711 |
| chr10 | DDIT4        | 72273122  | 72273630  | 2.15 | 6.78E-05 | 0.000579 |
| chr11 | ZNHIT2       | 65116446  | 65117669  | 2.15 | 9.03E-06 | 0.000178 |
| chr12 | SNRNP35      | 123458132 | 123458928 | 2.15 | 0.000503 | 0.00204  |
| chr12 | AMIGO2       | 47080084  | 47080613  | 2.15 | 0.000585 | 0.00226  |
| chr12 | RAP1B        | 68610076  | 68610694  | 2.15 | 0.000113 | 0.000785 |
| chr13 | CCDC122      | 43878813  | 43879496  | 2.15 | 0.000138 | 0.000895 |
| chr13 | ABCC4        | 95300572  | 95300984  | 2.15 | 0.000457 | 0.00191  |
| chr16 | GPT2         | 46884504  | 46885277  | 2.15 | 0.000198 | 0.00112  |
| chr17 | CACNB1       | 39196895  | 39197722  | 2.15 | 1.07E-05 | 0.000198 |
| chr17 | KCTD11       | 7350463   | 7351628   | 2.15 | 5.16E-07 | 3.90E-05 |
| chr18 | FHOD3        | 36296818  | 36297292  | 2.15 | 0.00416  | 0.00914  |
| chr19 | ZNF788P      | 12092276  | 12092803  | 2.15 | 0.000166 | 0.000996 |
| chr2  | RHOQ         | 46543022  | 46544082  | 2.15 | 4.86E-06 | 0.000125 |
| chr22 | CHKB         | 50581915  | 50582858  | 2.15 | 1.66E-06 | 7.48E-05 |
| chr3  | TM4SF19-AS1  | 196318381 | 196318693 | 2.15 | 0.0034   | 0.00788  |
| chr3  | NT5DC2       | 52534082  | 52534320  | 2.15 | 0.00328  | 0.00769  |
| chr5  | CDHR2        | 176542510 | 176542879 | 2.15 | 0.00161  | 0.0046   |
| chr7  | C7orf50      | 1137708   | 1138042   | 2.15 | 0.00207  | 0.00548  |
| chr7  | ITGB8        | 20330768  | 20331683  | 2.15 | 3.57E-07 | 3.30E-05 |
| chr8  | DPY19L4      | 94719368  | 94719732  | 2.15 | 0.000349 | 0.0016   |
| chr9  | CDKN2A       | 21993869  | 21994416  | 2.15 | 0.000183 | 0.00105  |

|       |              |           |           |      |          |          |
|-------|--------------|-----------|-----------|------|----------|----------|
| chr1  | ERO1B        | 236281185 | 236281968 | 2.14 | 0.000181 | 0.00105  |
| chr1  | AK5          | 77282293  | 77283264  | 2.14 | 9.66E-05 | 0.000712 |
| chr15 | CHST14       | 40471316  | 40472213  | 2.14 | 0.000152 | 0.000943 |
| chr16 | PRR14        | 30650867  | 30651417  | 2.14 | 0.000248 | 0.00129  |
| chr17 | TEN1         | 75979572  | 75980339  | 2.14 | 3.28E-05 | 0.000377 |
| chr17 | RNF213       | 80261174  | 80261846  | 2.14 | 3.24E-05 | 0.000376 |
| chr18 | MPPE1        | 11907969  | 11908825  | 2.14 | 8.29E-06 | 0.000169 |
| chr19 | ZNF564       | 12550650  | 12551492  | 2.14 | 8.10E-05 | 0.000643 |
| chr2  | SAP130       | 128028299 | 128028586 | 2.14 | 0.00806  | 0.0152   |
| chr22 | MIR1281      | 41091798  | 41092123  | 2.14 | 0.0012   | 0.00374  |
| chr3  | CGGBP1       | 88058148  | 88058939  | 2.14 | 3.44E-05 | 0.000386 |
| chr5  | TNPO1        | 72848177  | 72848500  | 2.14 | 0.00115  | 0.00362  |
| chr6  | CUL7         | 43052962  | 43053891  | 2.14 | 2.09E-07 | 2.42E-05 |
| chr6  | BCKDHB       | 80106685  | 80107265  | 2.14 | 0.000467 | 0.00194  |
| chr7  | KDM7A        | 140175805 | 140176220 | 2.14 | 0.00135  | 0.00407  |
| chr7  | LOC105375284 | 55019545  | 55020489  | 2.14 | 1.38E-05 | 0.000228 |
| chr7  | DAGLB        | 6446870   | 6447922   | 2.14 | 2.90E-07 | 2.89E-05 |
| chr8  | LOC112268016 | 98941445  | 98942134  | 2.14 | 0.000504 | 0.00204  |
| chr9  | SLC25A25     | 128097847 | 128098348 | 2.14 | 0.000506 | 0.00205  |
| chrX  | MTMR1        | 150693930 | 150694415 | 2.14 | 0.00334  | 0.00778  |
| chrX  | RPS6KA3      | 20265681  | 20266631  | 2.14 | 4.92E-05 | 0.000474 |
| chr1  | CSMD2        | 34163410  | 34164000  | 2.13 | 0.000651 | 0.00243  |
| chr1  | SSBP3        | 54404950  | 54405768  | 2.13 | 0.000473 | 0.00196  |
| chr1  | SLC35D1      | 67053819  | 67054566  | 2.13 | 3.70E-05 | 0.000401 |
| chr10 | VCL          | 73998129  | 73998326  | 2.13 | 0.00404  | 0.00896  |
| chr11 | FKBP2        | 64241663  | 64242778  | 2.13 | 3.05E-07 | 2.95E-05 |
| chr13 | STK24-AS1    | 98577451  | 98578121  | 2.13 | 6.13E-05 | 0.000543 |
| chr15 | ANP32A       | 68820701  | 68820891  | 2.13 | 0.00578  | 0.0117   |
| chr15 | POLG         | 89333737  | 89334811  | 2.13 | 3.25E-06 | 0.000105 |
| chr16 | XYLT1        | 17471074  | 17471360  | 2.13 | 0.00286  | 0.00694  |
| chr17 | PITPNC1      | 67377522  | 67378812  | 2.13 | 7.93E-05 | 0.000635 |

|       |              |           |           |      |          |          |
|-------|--------------|-----------|-----------|------|----------|----------|
| chr19 | ELL          | 18520733  | 18522084  | 2.13 | 1.83E-09 | 4.24E-06 |
| chr19 | ZNF57        | 2901301   | 2901852   | 2.13 | 0.00121  | 0.00375  |
| chr2  | SATB2        | 199458701 | 199459296 | 2.13 | 0.000515 | 0.00207  |
| chr2  | LRRFIP1      | 237626913 | 237627370 | 2.13 | 0.00111  | 0.00354  |
| chr2  | LINC01800    | 64865249  | 64865585  | 2.13 | 0.000959 | 0.0032   |
| chr3  | POLR2H       | 184362941 | 184363289 | 2.13 | 0.00175  | 0.00487  |
| chr4  | LCORL        | 18022305  | 18022901  | 2.13 | 0.000219 | 0.00119  |
| chr5  | LOC100996419 | 179858967 | 179859888 | 2.13 | 2.93E-06 | 9.93E-05 |
| chr6  | TFAP2A       | 10412554  | 10414360  | 2.13 | 4.54E-09 | 4.24E-06 |
| chr6  | AIG1         | 143060207 | 143060656 | 2.13 | 5.87E-05 | 0.000527 |
| chr7  | UBN2         | 139231250 | 139231597 | 2.13 | 0.0026   | 0.00649  |
| chr7  | CRPPA        | 16420750  | 16421664  | 2.13 | 2.41E-05 | 0.000316 |
| chr9  | MEGF9        | 120714744 | 120715262 | 2.13 | 0.000824 | 0.00286  |
| chr9  | TOR4A        | 137277316 | 137278556 | 2.13 | 8.06E-06 | 0.000167 |
| chrX  | TCEAL3       | 103608013 | 103608491 | 2.13 | 0.00296  | 0.00712  |
| chrX  | BCORL1       | 129983501 | 129983937 | 2.13 | 0.000789 | 0.00278  |
| chr1  | LINC01786    | 1274036   | 1275145   | 2.12 | 8.03E-06 | 0.000166 |
| chr1  | THEM4        | 151909729 | 151910103 | 2.12 | 0.00412  | 0.0091   |
| chr1  | PLEKHM2      | 15683759  | 15684286  | 2.12 | 0.000183 | 0.00105  |
| chr1  | LRRC8C       | 89632491  | 89632912  | 2.12 | 0.0127   | 0.0219   |
| chr10 | ZMIZ1        | 79067923  | 79068506  | 2.12 | 0.00366  | 0.00833  |
| chr13 | FBXL3        | 77027368  | 77027588  | 2.12 | 0.00967  | 0.0176   |
| chr14 | STYX         | 52730169  | 52731032  | 2.12 | 7.25E-06 | 0.000156 |
| chr14 | FOS          | 75278864  | 75280403  | 2.12 | 1.57E-06 | 7.20E-05 |
| chr15 | MEIS2        | 37100700  | 37102029  | 2.12 | 4.58E-06 | 0.000121 |
| chr16 | ZDHHC1       | 67415636  | 67416451  | 2.12 | 1.44E-05 | 0.000235 |
| chr16 | SPG7         | 89507133  | 89508233  | 2.12 | 4.34E-07 | 3.59E-05 |
| chr17 | CDK5R1       | 32483728  | 32484014  | 2.12 | 0.0054   | 0.0111   |
| chr17 | IGFBP4       | 40442854  | 40443454  | 2.12 | 0.000118 | 0.000805 |
| chr17 | VPS53        | 714957    | 715334    | 2.12 | 0.000675 | 0.00249  |
| chr19 | ZNF569       | 37466674  | 37467392  | 2.12 | 7.46E-05 | 0.000611 |

|       |                 |           |           |      |          |          |
|-------|-----------------|-----------|-----------|------|----------|----------|
| chr19 | ZNF329          | 58154216  | 58155103  | 2.12 | 1.29E-05 | 0.000219 |
| chr2  | ERBB4           | 212537196 | 212537541 | 2.12 | 0.00627  | 0.0125   |
| chr2  | C2orf81         | 74415262  | 74415651  | 2.12 | 0.00417  | 0.00916  |
| chr22 | TPST2           | 26589099  | 26589852  | 2.12 | 5.83E-05 | 0.000526 |
| chr22 | SELENOO         | 50199801  | 50200544  | 2.12 | 4.95E-05 | 0.000476 |
| chr3  | FAM86HP         | 130110772 | 130111438 | 2.12 | 6.97E-05 | 0.000586 |
| chr3  | FAM86DP         | 75434407  | 75435079  | 2.12 | 5.05E-05 | 0.000481 |
| chr4  | LOC107986250    | 2467852   | 2468913   | 2.12 | 3.40E-06 | 0.000107 |
| chr5  | PPP2CA          | 134226410 | 134227096 | 2.12 | 5.68E-05 | 0.000518 |
| chr6  | CDKN1A          | 36678795  | 36680313  | 2.12 | 2.55E-06 | 9.15E-05 |
| chr7  | TMEM178B        | 141073422 | 141073926 | 2.12 | 0.00197  | 0.0053   |
| chr7  | ADAP1           | 953286    | 953657    | 2.12 | 0.000989 | 0.00327  |
| chr9  | GBGT1           | 133163109 | 133164354 | 2.12 | 0.000145 | 0.000918 |
| chr9  | DPH7            | 137579075 | 137579577 | 2.12 | 0.000829 | 0.00287  |
| chr9  | MLLT3           | 20620715  | 20621814  | 2.12 | 1.82E-06 | 7.75E-05 |
| chr1  | CASP9           | 15523808  | 15524325  | 2.11 | 8.97E-05 | 0.00068  |
| chr11 | RAD9A           | 67391979  | 67392898  | 2.11 | 5.98E-06 | 0.00014  |
| chr12 | TUBA1C          | 49265116  | 49265718  | 2.11 | 0.000103 | 0.000738 |
| chr14 | ANKRD9          | 102508557 | 102509356 | 2.11 | 8.84E-05 | 0.000675 |
| chr15 | CDIN1           | 36579205  | 36579521  | 2.11 | 0.00415  | 0.00914  |
| chr16 | TELO2           | 1493425   | 1494884   | 2.11 | 1.02E-05 | 0.000193 |
| chr17 | UBTF            | 44220180  | 44220849  | 2.11 | 3.75E-05 | 0.000402 |
| chr17 | TBC1D16         | 80035192  | 80035671  | 2.11 | 9.96E-05 | 0.000723 |
| chr19 | CEBPA-DT        | 33302877  | 33304042  | 2.11 | 0.000143 | 0.000912 |
| chr19 | PIP5K1C         | 3699005   | 3700109   | 2.11 | 1.28E-06 | 6.41E-05 |
| chr2  | PHOSPHO2-KLHL23 | 169694514 | 169695153 | 2.11 | 3.24E-05 | 0.000376 |
| chr2  | PELI1           | 64144076  | 64144421  | 2.11 | 0.00223  | 0.00579  |
| chr22 | ARSA            | 50628341  | 50628786  | 2.11 | 0.00449  | 0.00968  |
| chr3  | STAG1           | 136751333 | 136751973 | 2.11 | 0.00058  | 0.00224  |
| chr3  | PBRM1           | 52685311  | 52685568  | 2.11 | 0.000452 | 0.0019   |
| chr4  | CPEB2           | 15002528  | 15003169  | 2.11 | 8.41E-05 | 0.000658 |

|       |              |           |           |      |          |          |
|-------|--------------|-----------|-----------|------|----------|----------|
| chr4  | HERC3        | 88592490  | 88593082  | 2.11 | 0.000134 | 0.000873 |
| chr5  | ZFR          | 32444107  | 32444704  | 2.11 | 9.61E-05 | 0.000711 |
| chr6  | BVES         | 105136215 | 105136965 | 2.11 | 0.000144 | 0.000915 |
| chr8  | TNFRSF10D    | 23163639  | 23163977  | 2.11 | 0.000411 | 0.00178  |
| chr9  | KLF4         | 107490123 | 107490655 | 2.11 | 0.000181 | 0.00105  |
| chrX  | WDR45        | 49079402  | 49080366  | 2.11 | 0.000162 | 0.000981 |
| chr1  | PACC1        | 212413936 | 212414859 | 2.1  | 6.53E-05 | 0.000564 |
| chr10 | HNRNPF       | 43407936  | 43408833  | 2.1  | 8.68E-05 | 0.00067  |
| chr10 | STAMBPL1     | 88880517  | 88881234  | 2.1  | 4.21E-05 | 0.000433 |
| chr11 | BDNF         | 27699241  | 27700325  | 2.1  | 8.33E-06 | 0.00017  |
| chr11 | PPFIBP2      | 7513991   | 7514664   | 2.1  | 8.10E-05 | 0.000643 |
| chr16 | NAE1         | 66830369  | 66830929  | 2.1  | 0.000255 | 0.00131  |
| chr16 | GSE1         | 85553690  | 85554125  | 2.1  | 0.00943  | 0.0172   |
| chr17 | LOC105371785 | 43369078  | 43369445  | 2.1  | 0.00594  | 0.012    |
| chr17 | HEXD         | 82418788  | 82419044  | 2.1  | 0.00431  | 0.00938  |
| chr18 | SEH1L        | 12946960  | 12947643  | 2.1  | 4.43E-05 | 0.000444 |
| chr19 | PGLS-DT      | 17511707  | 17512780  | 2.1  | 0.000147 | 0.000925 |
| chr20 | NAPB         | 23420138  | 23421461  | 2.1  | 2.86E-07 | 2.87E-05 |
| chr22 | LINC01521    | 31346794  | 31347515  | 2.1  | 0.000138 | 0.000893 |
| chr4  | SH3RF1       | 169271254 | 169272114 | 2.1  | 3.68E-06 | 0.00011  |
| chr5  | SHROOM1      | 132829430 | 132829755 | 2.1  | 0.00429  | 0.00936  |
| chr6  | PDE10A       | 165660269 | 165661988 | 2.1  | 5.34E-06 | 0.000131 |
| chr6  | RPL7L1       | 42877331  | 42877674  | 2.1  | 0.00849  | 0.0159   |
| chr7  | DNAJB6       | 157336351 | 157336872 | 2.1  | 0.000489 | 0.002    |
| chr9  | FBXO10       | 37576400  | 37576795  | 2.1  | 0.00126  | 0.00388  |
| chr9  | TRIM14       | 98118862  | 98119566  | 2.1  | 0.00121  | 0.00375  |
| chr1  | MAP3K6       | 27365700  | 27366295  | 2.09 | 0.000656 | 0.00244  |
| chr1  | LINC01135    | 58785403  | 58785817  | 2.09 | 0.00026  | 0.00133  |
| chr10 | NRP1         | 33335006  | 33336611  | 2.09 | 8.98E-07 | 5.21E-05 |
| chr10 | BMPRI1A      | 86755484  | 86756371  | 2.09 | 3.30E-06 | 0.000105 |
| chr11 | PITPNM1      | 67504566  | 67505189  | 2.09 | 0.000368 | 0.00166  |



|       |             |           |           |      |          |          |
|-------|-------------|-----------|-----------|------|----------|----------|
| chr12 | TUBA1B      | 49130861  | 49131419  | 2.09 | 0.000459 | 0.00192  |
| chr13 | UBAC2       | 99199957  | 99200690  | 2.09 | 2.79E-05 | 0.000345 |
| chr14 | ZNF219      | 21103804  | 21104579  | 2.09 | 0.00021  | 0.00116  |
| chr14 | PPP1R3E     | 23302471  | 23302907  | 2.09 | 0.00369  | 0.00837  |
| chr14 | SOS2        | 50231760  | 50232011  | 2.09 | 0.00764  | 0.0146   |
| chr16 | B3GNT9      | 67150464  | 67151377  | 2.09 | 0.000237 | 0.00125  |
| chr16 | TMEM170A    | 75463157  | 75464643  | 2.09 | 2.30E-06 | 8.62E-05 |
| chr16 | MPG         | 78524     | 79371     | 2.09 | 5.74E-05 | 0.000521 |
| chr17 | ATXN7L3-AS1 | 44222310  | 44222733  | 2.09 | 0.000627 | 0.00237  |
| chr18 | ATP8B1      | 57801812  | 57803808  | 2.09 | 6.52E-07 | 4.45E-05 |
| chr20 | CEP250      | 35455159  | 35455795  | 2.09 | 0.000284 | 0.0014   |
| chr22 | EFCAB6      | 43812438  | 43813221  | 2.09 | 0.000258 | 0.00132  |
| chr22 | SBF1        | 50475164  | 50475815  | 2.09 | 0.00147  | 0.00433  |
| chr3  | ZNF502      | 44712740  | 44713073  | 2.09 | 0.00413  | 0.00911  |
| chr4  | LARP1B      | 128062075 | 128062527 | 2.09 | 0.000171 | 0.00101  |
| chr7  | GTF2IRD1P1  | 66843821  | 66844823  | 2.09 | 9.14E-05 | 0.00069  |
| chr8  | RGS20       | 53880031  | 53882512  | 2.09 | 3.03E-09 | 4.24E-06 |
| chr9  | CTNNA1      | 109012543 | 109013433 | 2.09 | 2.15E-05 | 0.000295 |
| chr9  | LPAR1       | 111038393 | 111038881 | 2.09 | 0.000193 | 0.00109  |
| chrX  | TIMP1       | 47582448  | 47582719  | 2.09 | 0.00323  | 0.00759  |
| chr1  | ATXN7L2     | 109483995 | 109484419 | 2.08 | 0.0032   | 0.00754  |
| chr1  | OSBPL9      | 51617136  | 51618160  | 2.08 | 4.42E-06 | 0.000118 |
| chr1  | F3          | 94540647  | 94541703  | 2.08 | 1.91E-06 | 7.89E-05 |
| chr11 | DIXDC1      | 111936012 | 111936590 | 2.08 | 0.0041   | 0.00906  |
| chr11 | PHLDB1      | 118620873 | 118621231 | 2.08 | 0.00385  | 0.00865  |
| chr11 | EXT2        | 44095705  | 44096869  | 2.08 | 9.30E-07 | 5.29E-05 |
| chr11 | MIR7155     | 64342034  | 64342538  | 2.08 | 0.00178  | 0.00492  |
| chr11 | C11orf80    | 66744044  | 66744630  | 2.08 | 2.04E-05 | 0.000285 |
| chr11 | AQP11       | 77589676  | 77590653  | 2.08 | 0.00121  | 0.00377  |
| chr11 | PNPLA2      | 818353    | 819395    | 2.08 | 3.58E-06 | 0.000109 |
| chr13 | FOXO1       | 40665217  | 40665759  | 2.08 | 0.000239 | 0.00126  |

|       |              |           |           |      |          |          |
|-------|--------------|-----------|-----------|------|----------|----------|
| chr15 | CLN6         | 68229836  | 68230421  | 2.08 | 0.00753  | 0.0144   |
| chr16 | LOC105371050 | 2459418   | 2459972   | 2.08 | 0.000141 | 0.000906 |
| chr16 | TRAP1        | 3717671   | 3718097   | 2.08 | 0.00187  | 0.00511  |
| chr17 | VAT1         | 43021694  | 43022168  | 2.08 | 0.00016  | 0.000975 |
| chr17 | WBP2         | 75855656  | 75856633  | 2.08 | 0.000123 | 0.000827 |
| chr17 | LOC105371901 | 77141418  | 77141817  | 2.08 | 0.000983 | 0.00325  |
| chr17 | PYCR1        | 81935793  | 81936187  | 2.08 | 0.00276  | 0.00677  |
| chr2  | CCDC93       | 118012755 | 118014053 | 2.08 | 6.60E-08 | 1.29E-05 |
| chr2  | LOC100287387 | 238847360 | 238847793 | 2.08 | 2.83E-05 | 0.000348 |
| chr22 | HMGXB4       | 35257507  | 35258628  | 2.08 | 3.07E-05 | 0.000366 |
| chr3  | LOC101926886 | 115148057 | 115148602 | 2.08 | 0.000613 | 0.00233  |
| chr3  | HMCES        | 129278290 | 129278699 | 2.08 | 0.00189  | 0.00515  |
| chr3  | SHISA5       | 48504318  | 48504920  | 2.08 | 0.000368 | 0.00166  |
| chr3  | FAM107A      | 58584959  | 58585434  | 2.08 | 0.00273  | 0.00672  |
| chr4  | CCDC110      | 185471489 | 185472207 | 2.08 | 0.000328 | 0.00154  |
| chr4  | CPZ          | 8592814   | 8593822   | 2.08 | 0.000125 | 0.000837 |
| chr5  | EFNA5        | 107673229 | 107673589 | 2.08 | 0.00126  | 0.00388  |
| chr5  | CTNNA1       | 138753720 | 138754448 | 2.08 | 7.43E-05 | 0.00061  |
| chr6  | CCND3        | 41940537  | 41941665  | 2.08 | 3.65E-06 | 0.00011  |
| chr7  | PTPRZ1       | 121873193 | 121873763 | 2.08 | 0.000377 | 0.00168  |
| chr7  | PDGFA        | 517884    | 519342    | 2.08 | 2.69E-06 | 9.49E-05 |
| chr7  | ZNF789       | 99472854  | 99473281  | 2.08 | 0.000668 | 0.00247  |
| chr8  | DPYSL2       | 26514140  | 26514485  | 2.08 | 0.00169  | 0.00475  |
| chr8  | MRPS28       | 80029521  | 80030201  | 2.08 | 5.40E-05 | 0.000503 |
| chr9  | GADD45G      | 89605014  | 89605958  | 2.08 | 0.000625 | 0.00237  |
| chrX  | SLC16A2      | 74422043  | 74423080  | 2.08 | 0.000104 | 0.000742 |
| chr1  | MIIP         | 12019535  | 12020209  | 2.07 | 2.33E-05 | 0.00031  |
| chr1  | PLXNA2       | 208243560 | 208244277 | 2.07 | 5.67E-05 | 0.000518 |
| chr10 | MXI1         | 110210153 | 110210952 | 2.07 | 1.44E-06 | 6.88E-05 |
| chr10 | EDRF1-DT     | 125718774 | 125719443 | 2.07 | 7.22E-05 | 0.000598 |
| chr10 | RPP38        | 15096647  | 15096923  | 2.07 | 0.00671  | 0.0132   |

|       |              |           |           |      |          |          |
|-------|--------------|-----------|-----------|------|----------|----------|
| chr11 | UBASH3B      | 122655756 | 122656180 | 2.07 | 0.0022   | 0.00575  |
| chr11 | RELA-DT      | 65663297  | 65663926  | 2.07 | 2.02E-05 | 0.000283 |
| chr13 | DGKH         | 42048061  | 42048629  | 2.07 | 2.68E-05 | 0.000337 |
| chr14 | LOC105370680 | 102516539 | 102516972 | 2.07 | 0.000978 | 0.00324  |
| chr14 | GPR68        | 91243868  | 91244178  | 2.07 | 0.0029   | 0.00701  |
| chr15 | PKM          | 72230447  | 72231101  | 2.07 | 0.000202 | 0.00113  |
| chr16 | PAGR1        | 29816150  | 29817357  | 2.07 | 9.60E-06 | 0.000185 |
| chr16 | LOC105371038 | 648051    | 649235    | 2.07 | 1.01E-06 | 5.53E-05 |
| chr16 | ST3GAL2      | 70437568  | 70438822  | 2.07 | 2.47E-06 | 8.98E-05 |
| chr17 | ATP5PD       | 75046448  | 75046961  | 2.07 | 9.15E-05 | 0.00069  |
| chr19 | CDKN2D       | 10568214  | 10568691  | 2.07 | 0.00105  | 0.0034   |
| chr19 | LOC105372253 | 5293353   | 5293839   | 2.07 | 0.00118  | 0.0037   |
| chr19 | ZIK1         | 57584167  | 57584670  | 2.07 | 0.000666 | 0.00247  |
| chr2  | EPHA4        | 221571477 | 221572235 | 2.07 | 6.17E-05 | 0.000545 |
| chr4  | DGKQ         | 971734    | 973265    | 2.07 | 2.39E-07 | 2.61E-05 |
| chr6  | SAMD3        | 130365563 | 130366062 | 2.07 | 0.00113  | 0.00359  |
| chr7  | ARF5         | 127587760 | 127588283 | 2.07 | 0.000266 | 0.00135  |
| chr7  | LOC100506302 | 155643692 | 155644383 | 2.07 | 0.000107 | 0.000754 |
| chr7  | POR          | 75914330  | 75914929  | 2.07 | 0.00103  | 0.00336  |
| chr8  | PLEC         | 143947866 | 143948519 | 2.07 | 0.000349 | 0.0016   |
| chrX  | USP9X        | 41084919  | 41086341  | 2.07 | 8.50E-07 | 5.00E-05 |
| chr1  | NBPF8        | 120414634 | 120416442 | 2.06 | 7.72E-05 | 0.000625 |
| chr1  | RNF187       | 228486328 | 228486927 | 2.06 | 0.00317  | 0.00749  |
| chr1  | ECHDC2       | 52927044  | 52928406  | 2.06 | 1.98E-06 | 7.94E-05 |
| chr1  | JUN          | 58781862  | 58783981  | 2.06 | 6.18E-07 | 4.30E-05 |
| chr10 | LOC441666    | 42367295  | 42367956  | 2.06 | 0.00071  | 0.00257  |
| chr10 | HNRNPF       | 43407377  | 43407738  | 2.06 | 0.00206  | 0.00547  |
| chr10 | UNC5B        | 71212937  | 71213616  | 2.06 | 3.74E-05 | 0.000402 |
| chr10 | LINC00863    | 87342700  | 87343733  | 2.06 | 0.0023   | 0.00592  |
| chr10 | IFIT5        | 89414805  | 89415754  | 2.06 | 1.38E-06 | 6.69E-05 |
| chr10 | PANK1-AS1    | 89645336  | 89645538  | 2.06 | 0.0162   | 0.0267   |

|       |              |           |           |      |          |          |
|-------|--------------|-----------|-----------|------|----------|----------|
| chr11 | ARNTL        | 13278131  | 13279365  | 2.06 | 1.27E-05 | 0.000217 |
| chr11 | ARHGAP1      | 46699863  | 46700582  | 2.06 | 6.67E-06 | 0.000147 |
| chr12 | B4GALNT1     | 57631946  | 57632945  | 2.06 | 4.54E-05 | 0.00045  |
| chr14 | NIN          | 50831328  | 50831860  | 2.06 | 0.000991 | 0.00327  |
| chr14 | GPR68        | 91244388  | 91244675  | 2.06 | 0.00233  | 0.00599  |
| chr15 | PYGO1        | 55587413  | 55587962  | 2.06 | 0.00461  | 0.00988  |
| chr16 | TRM-CAT6-1   | 87384097  | 87384983  | 2.06 | 2.00E-04 | 0.00112  |
| chr16 | FBXO31       | 87391336  | 87392079  | 2.06 | 0.000106 | 0.000752 |
| chr17 | SLC16A13     | 7036158   | 7036901   | 2.06 | 0.000653 | 0.00243  |
| chr18 | CDH2         | 28178154  | 28178598  | 2.06 | 0.00276  | 0.00677  |
| chr19 | CCDC159      | 11346722  | 11347102  | 2.06 | 0.00178  | 0.00493  |
| chr19 | DBP          | 48636499  | 48637195  | 2.06 | 0.000118 | 0.000802 |
| chr19 | ARID3A       | 924595    | 925950    | 2.06 | 3.33E-07 | 3.11E-05 |
| chr2  | METAP1D      | 171999990 | 172000450 | 2.06 | 0.00299  | 0.00717  |
| chr21 | ADAMTS5      | 26967495  | 26967981  | 2.06 | 0.00161  | 0.00459  |
| chr21 | AGPAT3       | 43864186  | 43864539  | 2.06 | 0.00274  | 0.00674  |
| chr21 | LOC101928796 | 45973883  | 45974855  | 2.06 | 7.35E-05 | 0.000605 |
| chr22 | SLC25A1      | 19179086  | 19179527  | 2.06 | 0.00254  | 0.00638  |
| chr22 | TOM1         | 35300244  | 35300798  | 2.06 | 3.17E-05 | 0.000372 |
| chr3  | EOGT         | 69013425  | 69014253  | 2.06 | 7.64E-05 | 0.000621 |
| chr4  | NSD2         | 1869995   | 1870789   | 2.06 | 3.73E-05 | 0.000402 |
| chr4  | RAP1GDS1     | 98259993  | 98261124  | 2.06 | 2.60E-07 | 2.73E-05 |
| chr4  | DNAJB14      | 99946824  | 99947341  | 2.06 | 0.000534 | 0.00212  |
| chr6  | PNRC1        | 89080776  | 89081297  | 2.06 | 0.00187  | 0.00511  |
| chr7  | MDFIC        | 114922229 | 114922878 | 2.06 | 0.000222 | 0.0012   |
| chr7  | LOC100288712 | 5562930   | 5563696   | 2.06 | 0.000632 | 0.00238  |
| chr7  | SUMF2        | 56064311  | 56065355  | 2.06 | 1.87E-05 | 0.000272 |
| chr8  | PLEC         | 143942302 | 143943946 | 2.06 | 3.47E-05 | 0.000387 |
| chr8  | LACTB2       | 70668790  | 70669109  | 2.06 | 0.00265  | 0.00657  |
| chr9  | PTGR1        | 111599305 | 111599817 | 2.06 | 0.000439 | 0.00186  |
| chr9  | PHPT1        | 136847713 | 136849164 | 2.06 | 1.07E-06 | 5.72E-05 |

|       |             |           |           |      |          |          |
|-------|-------------|-----------|-----------|------|----------|----------|
| chr9  | GAS1        | 86945936  | 86946157  | 2.06 | 0.0208   | 0.0327   |
| chrX  | APEX2       | 55000383  | 55000557  | 2.06 | 0.00633  | 0.0126   |
| chr1  | TRK-CTT13-1 | 165598425 | 165598678 | 2.05 | 0.00296  | 0.00711  |
| chr1  | MDM4        | 204516444 | 204517145 | 2.05 | 0.000922 | 0.00311  |
| chr1  | ZBTB18      | 244047670 | 244048185 | 2.05 | 0.000309 | 0.00148  |
| chr10 | KIF11       | 92593168  | 92593583  | 2.05 | 0.00247  | 0.00625  |
| chr10 | ZDHHC16     | 97446189  | 97446679  | 2.05 | 0.000491 | 0.002    |
| chr11 | GPR137      | 64270228  | 64270876  | 2.05 | 0.000162 | 0.00098  |
| chr11 | PGM2L1      | 74397710  | 74398430  | 2.05 | 0.000118 | 0.000802 |
| chr12 | YBX3        | 10722292  | 10722816  | 2.05 | 0.000351 | 0.00161  |
| chr12 | LOC729291   | 28190996  | 28191275  | 2.05 | 0.00638  | 0.0127   |
| chr13 | BIVM        | 102799688 | 102800230 | 2.05 | 0.000584 | 0.00226  |
| chr14 | ATL1        | 50532755  | 50533094  | 2.05 | 0.00303  | 0.00724  |
| chr16 | NPRL3       | 138803    | 139136    | 2.05 | 0.00595  | 0.012    |
| chr16 | UBALD1      | 4616598   | 4617213   | 2.05 | 8.84E-05 | 0.000675 |
| chr16 | CIAO3       | 739739    | 740970    | 2.05 | 1.37E-07 | 1.91E-05 |
| chr16 | FANCA       | 89815798  | 89816260  | 2.05 | 0.00133  | 0.00404  |
| chr17 | FAM117A     | 49763167  | 49763659  | 2.05 | 0.0057   | 0.0116   |
| chr19 | ARHGEF1     | 41883425  | 41884102  | 2.05 | 0.000383 | 0.0017   |
| chr2  | RGPD8       | 112432345 | 112433122 | 2.05 | 0.00244  | 0.0062   |
| chr2  | DLX1        | 172084409 | 172085235 | 2.05 | 0.00011  | 0.000773 |
| chr2  | KIDINS220   | 8836964   | 8837573   | 2.05 | 0.000114 | 0.000788 |
| chr20 | CEBPB-AS1   | 50191740  | 50192069  | 2.05 | 0.000986 | 0.00326  |
| chr3  | RABL3       | 120741997 | 120742486 | 2.05 | 0.000644 | 0.00241  |
| chr4  | MFSD10      | 2933535   | 2934407   | 2.05 | 0.000551 | 0.00216  |
| chr4  | NAP1L5      | 88697206  | 88697819  | 2.05 | 0.000425 | 0.00182  |
| chr6  | HIVEP1      | 12012719  | 12013164  | 2.05 | 0.000182 | 0.00105  |
| chr6  | SUPT3H      | 45377036  | 45378039  | 2.05 | 0.000181 | 0.00105  |
| chr7  | GSAP        | 77415723  | 77416370  | 2.05 | 0.000169 | 0.00101  |
| chr9  | PTGS1       | 122370936 | 122371726 | 2.05 | 9.63E-05 | 0.000711 |
| chr9  | STKLD1      | 133376286 | 133376957 | 2.05 | 2.01E-05 | 0.000283 |

|       |              |           |           |      |          |          |
|-------|--------------|-----------|-----------|------|----------|----------|
| chrX  | PAK3         | 111096390 | 111096703 | 2.05 | 0.00553  | 0.0113   |
| chr1  | ATP13A2      | 17010499  | 17011745  | 2.04 | 3.83E-07 | 3.38E-05 |
| chr1  | PIK3C2B      | 204493601 | 204494664 | 2.04 | 3.72E-05 | 0.000402 |
| chr1  | TMEM200B     | 29124053  | 29124635  | 2.04 | 0.000226 | 0.00122  |
| chr1  | LOC107984966 | 64470834  | 64471644  | 2.04 | 0.00123  | 0.0038   |
| chr11 | MSANTD4      | 106021590 | 106022225 | 2.04 | 1.10E-05 | 0.000201 |
| chr11 | CD81-AS1     | 2377509   | 2379266   | 2.04 | 1.75E-09 | 4.24E-06 |
| chr12 | PTMS         | 6767048   | 6767524   | 2.04 | 0.000633 | 0.00238  |
| chr14 | ZBTB1        | 64504003  | 64504768  | 2.04 | 1.62E-05 | 0.000251 |
| chr16 | NUDT16L1     | 4694840   | 4695658   | 2.04 | 0.000221 | 0.0012   |
| chr16 | PLEKHG4      | 67277964  | 67278578  | 2.04 | 0.000254 | 0.00131  |
| chr17 | ALDH3A2      | 19647929  | 19648614  | 2.04 | 0.000508 | 0.00205  |
| chr17 | NLE1         | 35141640  | 35142262  | 2.04 | 6.79E-05 | 0.000579 |
| chr17 | CCDC40       | 80036009  | 80036520  | 2.04 | 0.000144 | 0.000915 |
| chr17 | FAAP100      | 81552491  | 81553150  | 2.04 | 9.83E-05 | 0.000719 |
| chr19 | DOT1L        | 2164193   | 2165687   | 2.04 | 4.26E-07 | 3.55E-05 |
| chr2  | PKP4         | 158457460 | 158458613 | 2.04 | 8.46E-05 | 0.00066  |
| chr2  | OSBPL6       | 178194690 | 178195741 | 2.04 | 8.93E-05 | 0.000679 |
| chr2  | PTMA         | 231706292 | 231706957 | 2.04 | 0.000274 | 0.00138  |
| chr2  | KLHL29       | 23385999  | 23387491  | 2.04 | 2.18E-07 | 2.45E-05 |
| chr20 | LOC107985400 | 25695592  | 25697187  | 2.04 | 6.46E-08 | 1.29E-05 |
| chr22 | LMF2         | 50506288  | 50507674  | 2.04 | 3.67E-08 | 9.34E-06 |
| chr3  | TMEM43       | 14125116  | 14125800  | 2.04 | 4.51E-05 | 0.000448 |
| chr3  | NLGN1        | 173395763 | 173396222 | 2.04 | 0.000457 | 0.00191  |
| chr3  | POLR2H       | 184361837 | 184362675 | 2.04 | 6.55E-06 | 0.000147 |
| chr5  | EFNA5        | 107671236 | 107671995 | 2.04 | 0.000498 | 0.00203  |
| chr5  | HNRNPAB      | 178203857 | 178204337 | 2.04 | 0.000708 | 0.00257  |
| chr7  | PDE1C        | 32071111  | 32071437  | 2.04 | 0.00465  | 0.00995  |
| Chr6  | SOX4         | 21594553  | 21595071  | 2.04 | 0.000313 | 0.0015   |
| chr8  | JRK          | 142668761 | 142669705 | 2.04 | 0.00045  | 0.0019   |
| chr9  | ZMYND19      | 137590750 | 137591530 | 2.04 | 0.000554 | 0.00217  |

|       |              |           |           |      |          |          |
|-------|--------------|-----------|-----------|------|----------|----------|
| chr9  | ANP32B       | 97982346  | 97983084  | 2.04 | 4.05E-06 | 0.000114 |
| chr1  | TUT4         | 52553581  | 52554039  | 2.03 | 0.000648 | 0.00242  |
| chr11 | LOC105379882 | 10931298  | 10931997  | 2.03 | 0.000872 | 0.00298  |
| chr11 | SLC22A18     | 2902288   | 2903661   | 2.03 | 0.000778 | 0.00275  |
| chr11 | BEST1        | 61954939  | 61956546  | 2.03 | 3.84E-07 | 3.38E-05 |
| chr11 | PTPRCAP      | 67434482  | 67434814  | 2.03 | 0.0108   | 0.0192   |
| chr11 | FUT4         | 94543966  | 94544363  | 2.03 | 0.00094  | 0.00315  |
| chr12 | GOLGA3       | 132827737 | 132828679 | 2.03 | 3.55E-05 | 0.000392 |
| chr12 | LOC102723983 | 51270133  | 51271003  | 2.03 | 0.000145 | 0.000917 |
| chr13 | TEX30        | 102772970 | 102773742 | 2.03 | 0.000531 | 0.00211  |
| chr15 | ADAL         | 43329325  | 43330159  | 2.03 | 1.94E-05 | 0.000276 |
| chr15 | RORA         | 60591006  | 60591734  | 2.03 | 9.53E-05 | 0.000709 |
| chr16 | DCTPP1       | 30429189  | 30430021  | 2.03 | 9.77E-05 | 0.000717 |
| chr17 | AKAP1        | 57085442  | 57086755  | 2.03 | 0.000112 | 0.000782 |
| chr17 | LOC107985034 | 75129391  | 75129675  | 2.03 | 0.017    | 0.0278   |
| chr19 | JUNB         | 12793795  | 12794278  | 2.03 | 0.000982 | 0.00325  |
| chr19 | MRPL34       | 17305843  | 17306787  | 2.03 | 9.84E-06 | 0.000189 |
| chr19 | ZNF446       | 58476175  | 58477116  | 2.03 | 0.000472 | 0.00195  |
| chr2  | PAX8-AS1     | 113235576 | 113236269 | 2.03 | 0.00378  | 0.00852  |
| chr2  | FNDC4        | 27494457  | 27494849  | 2.03 | 0.00315  | 0.00746  |
| chr2  | MSH2         | 47403260  | 47404187  | 2.03 | 0.000164 | 0.000987 |
| chr20 | RIN2         | 19757153  | 19759401  | 2.03 | 6.01E-08 | 1.23E-05 |
| chr22 | NUP50-DT     | 45163027  | 45163703  | 2.03 | 0.000311 | 0.00149  |
| chr3  | CHCHD6       | 126703763 | 126704073 | 2.03 | 0.0074   | 0.0142   |
| chr3  | EPHB1        | 134795407 | 134797362 | 2.03 | 1.01E-05 | 0.000191 |
| chr3  | ACTL6A       | 179562970 | 179563854 | 2.03 | 9.91E-05 | 0.000721 |
| chr6  | SMIM13       | 11093076  | 11093595  | 2.03 | 0.00112  | 0.00357  |
| chr7  | GNB2         | 100675288 | 100676131 | 2.03 | 2.25E-05 | 0.000302 |
| chr8  | HEY1         | 79767327  | 79767820  | 2.03 | 0.000607 | 0.00232  |
| chr8  | CFAP418      | 95268520  | 95269374  | 2.03 | 0.000153 | 0.000947 |
| chr9  | NACC2        | 136095941 | 136096500 | 2.03 | 0.00127  | 0.00389  |

|       |              |           |           |      |          |          |
|-------|--------------|-----------|-----------|------|----------|----------|
| chr9  | INPP5E       | 136438173 | 136439428 | 2.03 | 8.30E-07 | 4.93E-05 |
| chr9  | SMARCA2      | 2014397   | 2015065   | 2.03 | 9.99E-05 | 0.000724 |
| chr1  | GNB1-DT      | 1891549   | 1892204   | 2.02 | 9.45E-05 | 0.000705 |
| chr1  | FAAP20       | 2194874   | 2195776   | 2.02 | 0.000319 | 0.00151  |
| chr10 | FRMD4A       | 13892065  | 13892426  | 2.02 | 0.00171  | 0.0048   |
| chr12 | PRICKLE1     | 42588562  | 42589426  | 2.02 | 4.46E-05 | 0.000446 |
| chr12 | HOXC6        | 54017588  | 54018133  | 2.02 | 0.00105  | 0.0034   |
| chr14 | GCH1         | 54901115  | 54902473  | 2.02 | 3.54E-06 | 0.000108 |
| chr15 | GPR176       | 39918908  | 39920857  | 2.02 | 3.58E-09 | 4.24E-06 |
| chr16 | ZNF597       | 3442871   | 3443435   | 2.02 | 0.00151  | 0.00438  |
| chr16 | ZFPM1        | 88453895  | 88455495  | 2.02 | 2.25E-09 | 4.24E-06 |
| chr17 | JUP          | 41785741  | 41786349  | 2.02 | 0.0078   | 0.0148   |
| chr17 | USP36        | 78841065  | 78841558  | 2.02 | 0.00249  | 0.00629  |
| chr19 | HOOK2        | 12773521  | 12773947  | 2.02 | 0.00226  | 0.00585  |
| chr19 | KLF16        | 1864263   | 1865414   | 2.02 | 9.71E-06 | 0.000187 |
| chr19 | INSR         | 7292991   | 7293784   | 2.02 | 2.82E-05 | 0.000347 |
| chr2  | RAB10        | 26033130  | 26033734  | 2.02 | 0.00018  | 0.00105  |
| chr20 | LOC105372505 | 2652068   | 2652377   | 2.02 | 0.00301  | 0.00721  |
| chr22 | RTL10        | 19855058  | 19855990  | 2.02 | 2.03E-05 | 0.000284 |
| chr22 | DUSP18       | 30667968  | 30668557  | 2.02 | 0.00229  | 0.0059   |
| chr3  | RAF1         | 12664328  | 12664657  | 2.02 | 0.00054  | 0.00213  |
| chr3  | GMPPB        | 49724196  | 49724544  | 2.02 | 0.00309  | 0.00735  |
| chr3  | CDHR4        | 49802521  | 49803130  | 2.02 | 0.00127  | 0.0039   |
| chr5  | CTNNA1-AS1   | 138752523 | 138753274 | 2.02 | 2.60E-05 | 0.000332 |
| chr5  | DAB2         | 39424725  | 39425052  | 2.02 | 0.00271  | 0.00669  |
| chr6  | RAET1G       | 149922759 | 149923076 | 2.02 | 0.00749  | 0.0144   |
| chr6  | JARID2       | 15245517  | 15245867  | 2.02 | 0.00256  | 0.00643  |
| chr7  | C7orf50      | 1138474   | 1138822   | 2.02 | 0.00558  | 0.0114   |
| chr7  | GUSB         | 65981746  | 65982207  | 2.02 | 0.00311  | 0.00738  |
| chr7  | SLC25A40     | 87875662  | 87876334  | 2.02 | 0.00138  | 0.00414  |
| chr9  | MEGF9        | 120714298 | 120714468 | 2.02 | 0.00961  | 0.0175   |



|       |              |           |           |      |          |          |
|-------|--------------|-----------|-----------|------|----------|----------|
| chr9  | FBXW5        | 136943367 | 136944253 | 2.02 | 3.23E-05 | 0.000375 |
| chr9  | UAP1L1       | 137077830 | 137078962 | 2.02 | 3.37E-05 | 0.000381 |
| chr9  | KDM4C        | 6757130   | 6757838   | 2.02 | 0.000533 | 0.00212  |
| chrX  | XIAP         | 123860153 | 123860900 | 2.02 | 0.000112 | 0.000778 |
| chrX  | TMEM47       | 34655712  | 34657074  | 2.02 | 3.44E-06 | 0.000107 |
| chr1  | KIF14        | 200620416 | 200620733 | 2.01 | 0.00474  | 0.0101   |
| chr1  | LOC105372888 | 208244610 | 208244884 | 2.01 | 0.00738  | 0.0142   |
| chr1  | LOC101929626 | 46133231  | 46133780  | 2.01 | 0.000637 | 0.00239  |
| chr10 | SIRT1        | 67885027  | 67885416  | 2.01 | 0.00163  | 0.00464  |
| chr11 | SNX19        | 130915307 | 130916440 | 2.01 | 1.65E-07 | 2.08E-05 |
| chr11 | FANCF        | 22624910  | 22625804  | 2.01 | 0.000145 | 0.000919 |
| chr11 | BDNF         | 27700595  | 27701484  | 2.01 | 1.12E-05 | 0.000202 |
| chr12 | TRS-CGA4-1   | 56189770  | 56190305  | 2.01 | 0.00014  | 0.000903 |
| chr13 | ANKRD10      | 110915374 | 110916117 | 2.01 | 0.000112 | 0.00078  |
| chr13 | WASF3        | 26558169  | 26558683  | 2.01 | 0.000769 | 0.00273  |
| chr15 | ZFAND6       | 80060167  | 80060653  | 2.01 | 0.000613 | 0.00233  |
| chr15 | MEX3B        | 82044085  | 82045509  | 2.01 | 3.25E-06 | 0.000105 |
| chr15 | ARPIN        | 89911931  | 89913341  | 2.01 | 2.66E-05 | 0.000336 |
| chr16 | SOCS1        | 11256361  | 11256988  | 2.01 | 0.000803 | 0.00281  |
| chr16 | TBL3         | 1971414   | 1971907   | 2.01 | 0.00041  | 0.00178  |
| chr16 | POLR3E       | 22297457  | 22298249  | 2.01 | 4.92E-05 | 0.000474 |
| chr16 | C16orf87     | 46830023  | 46831155  | 2.01 | 1.77E-05 | 0.000264 |
| chr16 | PHAF1        | 67109936  | 67110820  | 2.01 | 9.44E-07 | 5.30E-05 |
| chr16 | ATP6V0D1     | 67480215  | 67481119  | 2.01 | 7.00E-07 | 4.59E-05 |
| chr17 | C17orf58     | 67993907  | 67994429  | 2.01 | 0.000522 | 0.00208  |
| chr17 | SMIM5        | 75632649  | 75633004  | 2.01 | 0.0117   | 0.0206   |
| chr19 | MOB3A        | 2095869   | 2096248   | 2.01 | 0.0055   | 0.0113   |
| chr19 | RABAC1       | 41958049  | 41959377  | 2.01 | 6.63E-06 | 0.000147 |
| chr19 | BICRA        | 47607810  | 47608704  | 2.01 | 3.13E-05 | 0.00037  |
| chr2  | LOC105369164 | 24792844  | 24793292  | 2.01 | 0.00429  | 0.00936  |
| chr22 | LIMK2        | 31212239  | 31212762  | 2.01 | 0.000442 | 0.00187  |

|       |                 |           |           |      |          |          |
|-------|-----------------|-----------|-----------|------|----------|----------|
| chr22 | MCAT            | 43142591  | 43143372  | 2.01 | 5.05E-05 | 0.000482 |
| chr3  | CTNNB1          | 41199516  | 41199736  | 2.01 | 0.00919  | 0.0169   |
| chr3  | FHIT            | 61250958  | 61251427  | 2.01 | 5.00E-04 | 0.00203  |
| chr4  | DDX60L          | 168479835 | 168480461 | 2.01 | 0.00263  | 0.00655  |
| chr4  | SEPSECS         | 25159967  | 25160438  | 2.01 | 0.000927 | 0.00312  |
| chr5  | FNIP1           | 131797236 | 131797789 | 2.01 | 0.00151  | 0.00439  |
| chr5  | EGR1            | 138465782 | 138467614 | 2.01 | 5.61E-05 | 0.000515 |
| chr5  | ANKHD1-EIF4EBP3 | 140401844 | 140402926 | 2.01 | 5.07E-07 | 3.85E-05 |
| chr5  | PIK3R1          | 68288527  | 68289170  | 2.01 | 0.00107  | 0.00345  |
| chr6  | JARID2          | 15248928  | 15249472  | 2.01 | 0.00121  | 0.00377  |
| chr6  | DSP             | 7541595   | 7543226   | 2.01 | 1.25E-06 | 6.38E-05 |
| chr7  | ELN-AS1         | 74061616  | 74062261  | 2.01 | 7.24E-05 | 0.000598 |
| chr8  | NSD3            | 38381590  | 38382169  | 2.01 | 0.000101 | 0.000728 |
| chr9  | C9orf50         | 129620503 | 129620900 | 2.01 | 0.00117  | 0.00368  |
| chr9  | FRG1HP          | 40991415  | 40992056  | 2.01 | 0.000798 | 0.0028   |
| chr9  | LOC107984035    | 41358160  | 41360096  | 2.01 | 0.007    | 0.0136   |
| chr1  | PPM1J-DT        | 112715581 | 112716027 | 2    | 0.00103  | 0.00336  |
| chr1  | CD101-AS1       | 117059488 | 117060074 | 2    | 0.000569 | 0.00221  |
| chr1  | ACADM           | 75724188  | 75725178  | 2    | 1.38E-05 | 0.000228 |
| chr10 | MINDY3          | 15859759  | 15860472  | 2    | 4.71E-05 | 0.000462 |
| chr10 | CCNJ            | 96043590  | 96045364  | 2    | 2.13E-08 | 7.84E-06 |
| chr11 | ARHGEF17        | 73308477  | 73308721  | 2    | 0.00523  | 0.0109   |
| chr11 | AKIP1           | 8911237   | 8912159   | 2    | 1.17E-05 | 0.000208 |
| chr12 | RAB3IP          | 69739394  | 69739950  | 2    | 0.00142  | 0.0042   |
| chr12 | ERC1            | 990389    | 991004    | 2    | 0.00051  | 0.00206  |
| chr14 | AJUBA           | 22980974  | 22982592  | 2    | 4.41E-06 | 0.000118 |
| chr14 | FUT8            | 65411875  | 65412423  | 2    | 0.000513 | 0.00207  |
| chr14 | EXD2            | 69191332  | 69192163  | 2    | 4.29E-05 | 0.000436 |
| chr15 | TUBGCP4         | 43370216  | 43371796  | 2    | 1.93E-06 | 7.89E-05 |
| chr15 | RORA            | 61227388  | 61228011  | 2    | 0.000489 | 0.002    |
| chr15 | SPG21           | 64990012  | 64990467  | 2    | 0.00445  | 0.00962  |

|       |         |           |           |   |          |          |
|-------|---------|-----------|-----------|---|----------|----------|
| chr15 | TTLL13  | 90249560  | 90249917  | 2 | 0.00309  | 0.00735  |
| chr16 | VPS35L  | 19555030  | 19555408  | 2 | 0.00578  | 0.0117   |
| chr16 | RABEP2  | 28925303  | 28926072  | 2 | 0.000571 | 0.00222  |
| chr16 | PDF     | 69329434  | 69330426  | 2 | 0.000216 | 0.00118  |
| chr18 | GALNT1  | 35580840  | 35581293  | 2 | 0.00187  | 0.00511  |
| chr19 | MPND    | 4342242   | 4342715   | 2 | 0.00156  | 0.00451  |
| chr19 | ZNF132  | 58439497  | 58440123  | 2 | 0.000564 | 0.0022   |
| chr2  | PLEKHB2 | 131104664 | 131105011 | 2 | 0.00285  | 0.00692  |
| chr2  | SH3YL1  | 263945    | 264521    | 2 | 0.000271 | 0.00137  |
| chr2  | USP39   | 85602873  | 85603548  | 2 | 8.97E-05 | 0.00068  |
| chr21 | RCAN1   | 34614159  | 34614565  | 2 | 0.000675 | 0.00249  |
| chr3  | TBC1D5  | 17741950  | 17742537  | 2 | 0.000594 | 0.00228  |
| chr3  | KAT2B   | 20040922  | 20041653  | 2 | 0.000327 | 0.00154  |
| chr4  | IL15    | 141636232 | 141637410 | 2 | 0.000168 | 0.001    |
| chr4  | CCDC149 | 24912312  | 24912697  | 2 | 0.00416  | 0.00914  |
| chr6  | MAN1A1  | 119349995 | 119350543 | 2 | 0.000245 | 0.00128  |
| chr6  | TFB1M   | 155313397 | 155314486 | 2 | 1.07E-05 | 0.000198 |
| chr6  | SOD2    | 159693611 | 159694198 | 2 | 7.88E-05 | 0.000633 |
| chr6  | PDCD2   | 170584722 | 170585264 | 2 | 0.000918 | 0.0031   |
| chr6  | GPLD1   | 24495347  | 24495771  | 2 | 0.00279  | 0.00683  |
| chr7  | RNY5    | 148940679 | 148941188 | 2 | 0.000112 | 0.000778 |
| chr8  | PTK2    | 141001511 | 141002426 | 2 | 1.68E-05 | 0.000256 |
| chr8  | SLC52A2 | 144358667 | 144360477 | 2 | 5.67E-07 | 4.12E-05 |
| chrX  | MOSPD1  | 134914351 | 134915234 | 2 | 0.00028  | 0.00139  |
| chrX  | FHL1    | 136146838 | 136147121 | 2 | 0.00769  | 0.0147   |
| chrX  | DKC1    | 154762962 | 154764122 | 2 | 5.68E-05 | 0.000518 |

Table 2. Differentially acetylated upstream loci regulated by EMAP II/ SPHK2.

|              |           |              |           |          |            |          |          |
|--------------|-----------|--------------|-----------|----------|------------|----------|----------|
| MPG          | PRR14     | FKBP2        | GAP43     | INTS11   | PRR5L      | PHAF1    | ARPC5L   |
| NPRL3        | TAB3      | GPR137       | PTGFRN    | CLCN7    | CDKN1A     | GPHN     | TRIB1    |
| PUF60        | BCKDK     | PRDX5        | FBXW8     | ERC1     | FHOD3      | KDM2A    | CHCHD6   |
| SLC9A3-AS1   | LINC01521 | MIR7155      | CD101-AS1 | TELO2    | CDIN1      | PLEKHG4  | ARF5     |
| ODF3L2       | SERINC2   | LOC107984966 | CCDC93    | MAFK     | MEIS2      | RAD9A    | LARP1B   |
| DIP2C        | SFI1      | ZBTB1        | PHLDB1    | CRAMP1   | ZNF569     | ZDHHC1   | SLC25A25 |
| PDGFA        | RNF138    | SPG21        | CEP85L    | MAPK8IP3 | ZC3H12A-DT | RPS6KB2  | RPN1     |
| CDC34        | MTMR9LP   | SLC1A4       | DDX6      | KLF16    | RELL1      | ATP6V0D1 | IER5L    |
| LOC105371038 | ZFR       | GNA13        | DENND10   | GNB1     | MDGA1      | AIP      | HMCES    |
| MYL5         | NRG1      | CCT6P3       | MAN1A1    | NSD2     | ZNF703     | PITPNM1  | BCORL1   |
| JMJD8        | NRP1      | TM7SF2       | NKRF      | TBL3     | H1-0       | CTCF     | FAM86HP  |
| VPS53        | CEBPG     | MSRB3        | NBPF8     | NELFA    | NSD3       | PITPNC1  | SAMD3    |
| CIAO3        | HMGA1     | SPRED2       | MEGF9     | MOB3A    | KLF3-AS1   | FAM86C2P | IMP4     |
| PNPLA2       | SMIM29    | LTBP3        | NOTCH2NLR | SMARCA2  | JOSD1      | SIRT1    | SNX19    |
| SUN1         | TMEM47    | LEPR         | CNTRL     | FAAP20   | RRAGC      | C17orf58 | PLEKHB2  |
| GET4         | ZNF302    | PDE7A        | PTGS1     | DOT1L    | LASP1      | CLN6     | NTNG2    |
| CHID1        | ZNF792    | GUSB         | KPNA1     | OAZ1     | RICTOR     | DNA2     | PWWP2B   |
| R3HDM4       | NLE1      | TRY-GTA5-2   | UBASH3B   | SNX8     | CACNB1     | ANP32A   | SEPTIN8  |
| ADAP1        | SFPQ      | B4GAT1       | ZHX1      | CD81-AS1 | FBXL20     | PJA1     | AFF4     |

|                |             |                |                |                  |                  |               |                |
|----------------|-------------|----------------|----------------|------------------|------------------|---------------|----------------|
| DGKQ           | TOM1        | TIPIN          | SPRY1          | LOC10798<br>6250 | LOC10537<br>1770 | EXD2          | ZNF140         |
| ARID3A         | NFKBIA      | PRKCA          | SNRNP35        | MIR3178          | LOC10537<br>0461 | TJP2          | GBGT1          |
| C7orf50        | GALNT<br>1  | C11orf80       | XIAP           | VLDLR-AS1        | DYRK1B           | PDF           | VAV2           |
| CBARP          | BRMS1<br>L  | GTF2IRD1P<br>1 | TMEM65         | PAFAH1B1         | GPR176           | FADD          | CDKN2AIP<br>NL |
| LINC01786      | OSCP1       | SLC35D1        | SCARB1         | SLC22A18         | MOCS1            | ST3GAL2       | PABIR3         |
| ADD1           | CAP1        | TRAM1          | EPHB1          | DAGLB            | ZNF239           | COMTD1        | HIVEP2         |
| ZNF77          | CDK13       | UNC5B          | MACROH<br>2A1  | KLHL21           | VEGFA            | MIF4GD-<br>DT | CHST2          |
| MMP25-<br>AS1  | NR1D1       | CEMIP2         | PPP1R26        | CHD4             | EFCAB6           | FOS           | GAB1           |
| TRP-TGG3-<br>3 | N4BP2       | FAM86C1P       | NACC2          | THAP3            | CCDC122          | FAM86DP       | SMARCA5        |
| ZNF597         | IGFBP4      | CHST3          | MSL2           | PTMS             | CCDC24           | SIN3A         | PLEC           |
| NAA60          | FOXO1       | PKM            | PHPT1          | KIAA0232         | SLC6A9           | TMEM170<br>A  | SHARPIN        |
| RFX3           | MED14       | INPPL1         | EDF1           | SLC16A13         | POLD2            | TMEM231       | MROH1          |
| PIP5K1C        | FRG1H<br>P  | DDIT4          | FBXW5          | GRPEL1           | UBTF             | ACADM         | DGAT1          |
| TAX1BP3        | USP9X       | DPF3           | UAP1L1         | KDM4C            | ATXN7L3-<br>AS1  | WBP2          | SLC52A2        |
| TRAP1          | CTNNB<br>1  | TNPO1          | TOR4A          | PHF23            | EXT2             | TRIM47        | ZNF827         |
| PGAP2          | BACE2       | POM121         | ZMYND1<br>9    | INSR             | TSC22D1          | POR           | RNVU1-21       |
| CEP104         | EIF1        | RAB11FIP5      | DZIP1L         | KCTD11           | KCTD8            | TEN1          | ADRB2          |
| MIR4687        | ARHGE<br>F1 | COG1           | EGR1           | DSP              | PVR              | SPHK1         | EZH2           |
| ZBTB7A         | CCND3       | CDC42EP4       | CTNNA1-<br>AS1 | PPFIBP2          | SETBP1-DT        | ZNF516-DT     | UST            |

|                  |              |                |                     |        |                  |                  |                  |
|------------------|--------------|----------------|---------------------|--------|------------------|------------------|------------------|
| ANKRD24          | RABAC<br>1   | FOXD1          | CTNNA1              | KDM6B  | NUP50-DT         | GCNT1            | GINM1            |
| MPND             | DGKH         | ELN-AS1        | UBN2                | PER1   | TRAPPC6A         | MFSD11           | PCMT1            |
| UBE2G1           | PRICKL<br>E1 | TET3           | SETD7               | CPZ    | SUPT3H           | LOC10798<br>4638 | MAMLD1           |
| MYBBP1A          | CYB5R3       | VCL            | CYSTM1              | AKIP1  | VASP             | MBP              | MTHFD1L          |
| UBALD1           | CDAN1        | MTHFD2         | ANKHD1-<br>EIF4EBP3 | ERI1   | EML2-AS1         | PTPN12           | LOC10798<br>6862 |
| PFN1             | RPL7L1       | PDPR2P         | LINC0063<br>2       | WEE1   | IRF2BP1          | RSBN1L           | GALNT11          |
| INCA1            | CUL7         | PGM2L1         | PTK2                | VAPA   | LOC10192<br>9626 | CNOT6L           | ARL6IP6          |
| EEF2KMT          | MCAT         | SEMA7A         | TMEM17<br>8B        | RAVER1 | CDPF1            | NEXN             | RPL10            |
| LOC72839<br>2    | SRF          | SLC16A2        | LINC0261<br>8       | TFAP2A | ELMO2            | SOCS3            | CNKSR3           |
| LOC10028<br>8712 | ADAL         | TRR-CCT2-<br>1 | IL15                | PGD    | RHOQ             | GAB2             | DKC1             |
| FBH1             | TUBGC<br>P4  | ATP5PD         | JRK                 | KEAP1  | HARBI1           | USP36            | LARP1            |
| TMEM220          | ARHGA<br>P1  | ZMIZ1          | SHC1                |        |                  |                  |                  |
