# Supplementary material
Source: PubMed Central journal article supplement (PMC10543610)
Supplement: NIHMS1928619-supplement-322740_Major_Resource_Table.pdf [file NIHMS1928619-supplement-322740_Major_Resource_Table.pdf]

## Major Resources Table

In order to allow validation and replication of experiments, all essential research materials listed in the Methods should be included in the Major Resources Table below. Authors are encouraged to use public repositories for protocols, data, code, and other materials and provide persistent identifiers and/or links to repositories when available. Authors may add or delete rows as needed.

### Animals (in vivo studies)

| Species                                                       | Vendor or Source          | Background Strain | Sex | Persistent ID / URL                                                               |
|---------------------------------------------------------------|---------------------------|-------------------|-----|-----------------------------------------------------------------------------------|
| SPHK2 KO :<br>B6N.129S6-<br><i>Sphk2</i> <sup>tm1Rlp</sup> /J | The Jackson<br>Laboratory | C57BL/6NJ         | M   | <a href="https://www.jax.org/strain/019140">https://www.jax.org/strain/019140</a> |
| C57BL/6NJ                                                     | The Jackson<br>Laboratory | C57BL/6NJ         | M   | <a href="https://www.jax.org/strain/005304">https://www.jax.org/strain/005304</a> |
|                                                               |                           |                   |     |                                                                                   |

### Genetically Modified Animals

|                        | Species                                                      | Vendor or Source          | Background Strain | Other Information | Persistent ID / URL                                                               |
|------------------------|--------------------------------------------------------------|---------------------------|-------------------|-------------------|-----------------------------------------------------------------------------------|
| <b>Parent - Male</b>   | SPHK2 KO:<br>B6N.129S6-<br><i>Sphk2</i> <sup>tm1Rlp</sup> /J | The Jackson<br>Laboratory | C57BL/6NJ         |                   | <a href="https://www.jax.org/strain/019140">https://www.jax.org/strain/019140</a> |
| <b>Parent - Female</b> | SPHK2 KO:<br>B6N.129S6-<br><i>Sphk2</i> <sup>tm1Rlp</sup> /J | The Jackson<br>Laboratory | C57BL/6NJ         |                   |                                                                                   |

### Antibodies

| Target antigen        | Vendor or Source          | Catalog #  | Working concentration | Lot # (preferred but not required) | Persistent ID / URL                                                                                                                                                                                                                                                                                                                                                             |
|-----------------------|---------------------------|------------|-----------------------|------------------------------------|---------------------------------------------------------------------------------------------------------------------------------------------------------------------------------------------------------------------------------------------------------------------------------------------------------------------------------------------------------------------------------|
| Ac-H3K9               | Cell Signaling Technology | 9649T      | 1:1000                |                                    | <a href="https://www.cellsignal.com/products/primary-antibodies/acetyl-histone-h3-lys9-c5b11-rabbit-mab/9649">https://www.cellsignal.com/products/primary-antibodies/acetyl-histone-h3-lys9-c5b11-rabbit-mab/9649</a>                                                                                                                                                           |
| Total H3              | Cell Signaling Technology | 9715S      | 1:1000                |                                    | <a href="https://www.cellsignal.com/products/primary-antibodies/histone-h3-antibody/9715?site-search-type=Products&amp;N=4294956287&amp;Ntt=9715s&amp;fromPage=plp&amp;_requestid=1844484">https://www.cellsignal.com/products/primary-antibodies/histone-h3-antibody/9715?site-search-type=Products&amp;N=4294956287&amp;Ntt=9715s&amp;fromPage=plp&amp;_requestid=1844484</a> |
| SPHK2                 | Cell Signaling Technology | 32346      | 1:1000                |                                    | <a href="https://www.cellsignal.com/products/primary-antibodies/sphk2-d2v3g-rabbit-mab/32346">https://www.cellsignal.com/products/primary-antibodies/sphk2-d2v3g-rabbit-mab/32346</a>                                                                                                                                                                                           |
| SPHK2                 | Proteintech               | 17096-1-AP | 1:1000                |                                    | <a href="https://www.ptglab.com/products/SPHK2-Antibody-17096-1-AP.htm">https://www.ptglab.com/products/SPHK2-Antibody-17096-1-AP.htm</a>                                                                                                                                                                                                                                       |
| phosphoSPHK2 (Thr614) | Thermo Fischer Scientific | PA5-39812  | 1:50                  |                                    | <a href="https://www.fishersci.com/shop/products/phosphosphk2-thr614-polyclonal-antibody-invitrogen/PIPA539812">https://www.fishersci.com/shop/products/phosphosphk2-thr614-polyclonal-antibody-invitrogen/PIPA539812</a>                                                                                                                                                       |
| phosphoSPHK2 (Thr614) | Abcam                     | Ab212750   | 1:1000                |                                    | <a href="https://www.abcam.com/products/primary-antibodies/sphk2-phospho-t614-antibody-ab111948.html">https://www.abcam.com/products/primary-antibodies/sphk2-phospho-t614-antibody-ab111948.html</a>                                                                                                                                                                           |

|                                          |                           |             |        |  |                                                                                                                                                                                                                                                                                                                                                                                                                                                                     |
|------------------------------------------|---------------------------|-------------|--------|--|---------------------------------------------------------------------------------------------------------------------------------------------------------------------------------------------------------------------------------------------------------------------------------------------------------------------------------------------------------------------------------------------------------------------------------------------------------------------|
| $\alpha$ -tubulin                        | Cell Signaling Technology | 3873T       | 1:1000 |  | <a href="https://www.cellsignal.com/products/primary-antibodies/a-tubulin-dm1a-mouse-mab/3873">https://www.cellsignal.com/products/primary-antibodies/a-tubulin-dm1a-mouse-mab/3873</a>                                                                                                                                                                                                                                                                             |
| Lamin B                                  | Santa Cruz                | sc-6217     | 1:800  |  | <a href="https://www.scbt.com/p/lamin-b-antibody-m-20">https://www.scbt.com/p/lamin-b-antibody-m-20</a>                                                                                                                                                                                                                                                                                                                                                             |
| KLF4                                     | Cell Signaling Technology | 4038S       | 1:1000 |  | <a href="https://www.cellsignal.com/products/primary-antibodies/klf4-antibody/4038?gclid=Cj0KCQjw756lBhDMARIsAEi0AglKGHRiZiXmLSxFSP23Rcehvrac1_oBXOnjHZr4xllzWoXaupQzcywaAiyMEALw_wcB&amp;gclsrc=aw.ds">https://www.cellsignal.com/products/primary-antibodies/klf4-antibody/4038?gclid=Cj0KCQjw756lBhDMARIsAEi0AglKGHRiZiXmLSxFSP23Rcehvrac1_oBXOnjHZr4xllzWoXaupQzcywaAiyMEALw_wcB&amp;gclsrc=aw.ds</a>                                                           |
| Alexa Fluor 488 Phalloidin               | Thermo Fischer Scientific | A12379      | 1:500  |  | <a href="https://www.thermofisher.com/order/catalog/product/A12379">https://www.thermofisher.com/order/catalog/product/A12379</a>                                                                                                                                                                                                                                                                                                                                   |
| HRP-conjugated rabbit secondary antibody | Cell Signaling Technology | 7074S       | 1:4000 |  | <a href="https://www.cellsignal.com/products/secondary-antibodies/anti-rabbit-igg-hrp-linked-antibody/7074">https://www.cellsignal.com/products/secondary-antibodies/anti-rabbit-igg-hrp-linked-antibody/7074</a>                                                                                                                                                                                                                                                   |
| HRP-conjugated mouse secondary antibody  | Cell Signaling Technology | 7076S       | 1:4000 |  | <a href="https://www.cellsignal.com/products/secondary-antibodies/anti-mouse-igg-hrp-linked-antibody/7076">https://www.cellsignal.com/products/secondary-antibodies/anti-mouse-igg-hrp-linked-antibody/7076</a>                                                                                                                                                                                                                                                     |
| AIMP1                                    | Bethyl Laboratories       | A304-896a   | 1:1000 |  | <a href="https://www.thermofisher.com/antibody/product/AIMP1-EMAPII-SCYE1-Antibody-Polyclonal/A304-896A">https://www.thermofisher.com/antibody/product/AIMP1-EMAPII-SCYE1-Antibody-Polyclonal/A304-896A</a>                                                                                                                                                                                                                                                         |
| EMAP II (546-2)                          | Santa Cruz                | Sc-32723    | 1:100  |  | <a href="https://www.scbt.com/p/emap-ii-antibody-546-2">https://www.scbt.com/p/emap-ii-antibody-546-2</a>                                                                                                                                                                                                                                                                                                                                                           |
| Vinculin                                 | Cell Signaling Technology | 13901T      | 1:1000 |  | <a href="https://www.cellsignal.com/products/secondary-antibodies/anti-mouse-igg-hrp-linked-antibody/7076">https://www.cellsignal.com/products/secondary-antibodies/anti-mouse-igg-hrp-linked-antibody/7076</a>                                                                                                                                                                                                                                                     |
| HDAC1                                    | Cell Signaling Technology | 65816T      | 1:1000 |  | <a href="https://www.cellsignal.com/products/primary-antibodies/class-i-hdac-antibody-sampler-kit/65816">https://www.cellsignal.com/products/primary-antibodies/class-i-hdac-antibody-sampler-kit/65816</a>                                                                                                                                                                                                                                                         |
| HDAC2                                    | Bethyl Laboratories       | A300-705A-T | 1:1000 |  | <a href="https://www.cellsignal.com/products/primary-antibodies/class-i-hdac-antibody-sampler-kit/65816">https://www.cellsignal.com/products/primary-antibodies/class-i-hdac-antibody-sampler-kit/65816</a>                                                                                                                                                                                                                                                         |
| OCT4A                                    | Cell Signaling Technology | 2840T       | 1:1000 |  | <a href="https://www.cellsignal.com/products/primary-antibodies/oct-4a-c30a3-rabbit-mab/2840">https://www.cellsignal.com/products/primary-antibodies/oct-4a-c30a3-rabbit-mab/2840</a>                                                                                                                                                                                                                                                                               |
| SOX2                                     | Cell Signaling Technology | 4195        | 1:1000 |  | <a href="https://www.cellsignal.com/products/primary-antibodies/sox2-l73b4-mouse-mab/4195">https://www.cellsignal.com/products/primary-antibodies/sox2-l73b4-mouse-mab/4195</a>                                                                                                                                                                                                                                                                                     |
| Actin                                    | Sigma-Aldrich             | A5228-25ul  | 1:1000 |  | <a href="https://www.sigmaaldrich.com/US/en/substance/antiactinasmoothmuscleantibodymousemonooclonal1234598765?gclid=Cj0KCQjw756lBhDMARIsAEi0AgnCBX5AOrbQp1i6L-Nx1gRdDOVXjrZYxFEXYVvkqZeLIV6is2LLc0kAaAnp6EALw_wcB&amp;gclsrc=aw.ds">https://www.sigmaaldrich.com/US/en/substance/antiactinasmoothmuscleantibodymousemonooclonal1234598765?gclid=Cj0KCQjw756lBhDMARIsAEi0AgnCBX5AOrbQp1i6L-Nx1gRdDOVXjrZYxFEXYVvkqZeLIV6is2LLc0kAaAnp6EALw_wcB&amp;gclsrc=aw.ds</a> |
| Ac-H4K5                                  | Cell Signaling Technology | 8647S       | 1:1000 |  | <a href="https://www.cellsignal.com/products/primary-antibodies/acetyl-histone-h4-lys5-d12b3-rabbit-mab/8647">https://www.cellsignal.com/products/primary-antibodies/acetyl-histone-h4-lys5-d12b3-rabbit-mab/8647</a>                                                                                                                                                                                                                                               |

|                                         |                           |          |  |  |                                                                                                                                                                                                                                                   |
|-----------------------------------------|---------------------------|----------|--|--|---------------------------------------------------------------------------------------------------------------------------------------------------------------------------------------------------------------------------------------------------|
| Prolong Gold Antifade Reagent with DAPI | Cell Signaling Technology | 89615    |  |  | <a href="https://www.cellsignal.com/products/buffers-dyes/prolong-gold-antifade-reagent-with-dapi/8961">https://www.cellsignal.com/products/buffers-dyes/prolong-gold-antifade-reagent-with-dapi/8961</a>                                         |
| TripleStain IHC Kit: R&R&M on human     | Abcam                     | Ab183290 |  |  | <a href="https://www.abcam.com/products/ihc-kits/triplestain-ihc-kit-mrg-on-human-tissue-dab-apred--hrpgreen-ab183290.html">https://www.abcam.com/products/ihc-kits/triplestain-ihc-kit-mrg-on-human-tissue-dab-apred--hrpgreen-ab183290.html</a> |
| CAS Block™ Histochemical reagent        | Life Technologies         | 00-8120  |  |  | <a href="https://www.thermofisher.com/order/catalog/product/008120">https://www.thermofisher.com/order/catalog/product/008120</a>                                                                                                                 |
| Citrate 6.0 retrieval                   | Life Technologies         | 00-5000  |  |  | <a href="https://www.thermofisher.com/order/catalog/product/005000">https://www.thermofisher.com/order/catalog/product/005000</a>                                                                                                                 |
|                                         |                           |          |  |  |                                                                                                                                                                                                                                                   |

### DNA/cDNA Clones

| Clone Name | Sequence | Source / Repository | Persistent ID / URL |
|------------|----------|---------------------|---------------------|
|            |          |                     |                     |
|            |          |                     |                     |
|            |          |                     |                     |

### Cultured Cells

| Name            | Vendor or Source | Sex (F, M, or unknown) | Persistent ID / URL                                                                                                                                                                                                                                                                                                     |
|-----------------|------------------|------------------------|-------------------------------------------------------------------------------------------------------------------------------------------------------------------------------------------------------------------------------------------------------------------------------------------------------------------------|
| Human PASMCMC   | Lonza            | Male and Female donors | <a href="https://bioscience.lonza.com/lonza_bs/US/en/Primary-and-Stem-Cells/p/000000000000185155/PASMC---Human-Pulmonary-Artery-Smooth-Muscle-Cells">https://bioscience.lonza.com/lonza_bs/US/en/Primary-and-Stem-Cells/p/000000000000185155/PASMC---Human-Pulmonary-Artery-Smooth-Muscle-Cells</a>                     |
| Human Lung MVEC | Lonza            | Male and Female donors | <a href="https://bioscience.lonza.com/lonza_bs/US/en/Primary-and-Stem-Cells/p/000000000000184961/HMVEC-L-%E2%80%93-Human-Lung-Microvascular-Endothelial-Cells">https://bioscience.lonza.com/lonza_bs/US/en/Primary-and-Stem-Cells/p/000000000000184961/HMVEC-L-%E2%80%93-Human-Lung-Microvascular-Endothelial-Cells</a> |
|                 |                  |                        |                                                                                                                                                                                                                                                                                                                         |

### Data & Code Availability

| Description | Source / Repository | Persistent ID / URL |
|-------------|---------------------|---------------------|
|             |                     |                     |
|             |                     |                     |
|             |                     |                     |

### Other

| Description                                  | Source / Repository                | Persistent ID / URL                                                                                                                                                                                                                                                       |
|----------------------------------------------|------------------------------------|---------------------------------------------------------------------------------------------------------------------------------------------------------------------------------------------------------------------------------------------------------------------------|
| ON-TARGETplus Human SPHK2 siRNA (SMART pool) | Dharmacon L-004831-00-0005 (56848) | <a href="https://horizondiscovery.com/en/gene-modulation/knockdown/sirna/products/on-targetplus-sirna-reagents?nodeid=entrezgene-56848">https://horizondiscovery.com/en/gene-modulation/knockdown/sirna/products/on-targetplus-sirna-reagents?nodeid=entrezgene-56848</a> |
| ON-TARGETplus Non-targeting Control Pool     | Dharmacon D-001810-10-20           | <a href="https://horizondiscovery.com/en/gene-modulation/knockdown/controls/products/on-targetplus-non-targeting-control-pool">https://horizondiscovery.com/en/gene-modulation/knockdown/controls/products/on-targetplus-non-targeting-control-pool</a>                   |

DOI [to be added]

|                                                            |                          |                                                                                                                                                                                                                                               |
|------------------------------------------------------------|--------------------------|-----------------------------------------------------------------------------------------------------------------------------------------------------------------------------------------------------------------------------------------------|
| S1P Elisa Kit: General Sphingosine-1-Phosphate (ELISA kit) | MyBioSource<br>MB2700637 | <a href="https://www.mybiosource.com/general-elisa-kits/sphingosine-1-phosphate-s1p/2700637">https://www.mybiosource.com/general-elisa-kits/sphingosine-1-phosphate-s1p/2700637</a>                                                           |
| Histone Deacetylase (HDAC) Activity Assay Kit              | Abcam<br>Ab156064        | <a href="https://www.abcam.com/products/chip-kits/histone-deacetylase-hdac-activity-assay-kit-fluorometric-ab156064.html">https://www.abcam.com/products/chip-kits/histone-deacetylase-hdac-activity-assay-kit-fluorometric-ab156064.html</a> |

## ARRIVE GUIDELINES

The ARRIVE guidelines (<https://arriveguidelines.org/>) are a checklist of recommendations to improve the reporting of research involving animals. Key elements of the study design should be included below to better enable readers to scrutinize the research adequately, evaluate its methodological rigor, and reproduce the methods or findings.

### Study Design

| Groups             | Sex  | Age         | Number (prior to experiment) | Number (after termination) | Littermates (Yes/No) | Other description |
|--------------------|------|-------------|------------------------------|----------------------------|----------------------|-------------------|
| Group 1 (Control)  | Male | 12-14 weeks |                              |                            | yes                  |                   |
| Group 2            | Male | 12-14 weeks |                              |                            | yes                  |                   |
| Add more if needed |      |             |                              |                            |                      |                   |

**Sample Size:** Please explain how the sample size was decided Please provide details of any a *prior* sample size calculation, if done.

Based on data from similar studies by colleagues and from related published studies, sample size necessary to achieve significance identified the mean change for multiple parameters. Using these mean differences, 5-8 samples for human tissue and 6-10 mice/ group, to achieve a power=0.8-0.9 and alpha=0.01. Using these sample sizes, we calculate that we will have sufficient power to achieve an alpha of 0.05. The level of significance was defined with a cutoff of  $p < 0.05$ .

### Inclusion Criteria

Male and 12-14 weeks of age and littermates.

### Exclusion Criteria

none

### Randomization

Randomization on littermate cohorts was performed by using a coin flip methodology and distribution of littermates across all experimental groups.

### Blinding

Samples were randomized by an individual not involved in the study and analyzed by a different student not involved in the collection of the data. Results were then unblinded and analyzed.

DOI [to be added]
